# Supplementary material for: Enantioselective synthesis of δ-/γ-alkoxy-β-hydroxy-α-alkyl-substituted Weinreb amides via DKR–ATH: application to the synthesis of advanced intermediate of (−)-brevisamide
Source: Royal Society of Chemistry journal article supplement (doi:10.1039/c3ob41088a), 2013-01-01
Supplement: c3ob41088a.pdf [file c3ob41088a.pdf]

## Electronic Supplementary Information (ESI)

### **Enantioselective Synthesis of $\delta$ -/ $\gamma$ -Alkoxy- $\beta$ -hydroxy- $\alpha$ -alkylsubstituted Weinreb amides via DKR-ATH: Application to the Synthesis of Advanced Intermediate of (-)-Brevisamide**

Gullapalli Kumaraswamy,\* Akula Narayana Murthy, Vykunthapu Narayanarao, Sahithya PhaniBabu  
Vemulapalli and Jagadeesh Bharatam

**S2**      **General Information**

**S3-S4**    **General procedure for the synthesis of racemic compounds**

**S5– S39**    **$^1\text{H}$  NMR and  $^{13}\text{C}$ NMR Spectra's**

**S40-S65**   **HPLC data**

**S66– S70**   **NMR (NOE) - study**

### General information:

All reactions were conducted under an atmosphere of nitrogen (IOLAR Grade I). Apparatus used for reactions were oven dried. THF was distilled over sodium benzophenone ketyl before use and 2-propanol distilled over calcium hydride. All other chemicals used were commercially available. Progress of the reactions was monitored by TLC on pre-coated silica gel 60 F-254. Evaporation of solvents was performed at reduced pressure on a rotary evaporator. Column chromatography was carried out with silica gel grade 60-120 and 100-200 mesh.  $^1\text{H}$  NMR spectra were recorded at 300 & 500 MHz and  $^{13}\text{C}$  NMR 75 MHz in  $\text{CDCl}_3$ . 1D ( $^1\text{H}$ ,  $^1\text{H}$ - $^1\text{H}$  homo-nuclear decoupling and  $^{13}\text{C}$ ) and 2D (gDQCOSY, NOESY, TOCSY and HSQC) NMR spectra of Compounds **9**, **11**, and **13** were recorded on a Avance 500 MHz ( $^{13}\text{C}$  at 125 MHz) spectrometer in  $\text{CDCl}_3$  at 298 K. Chemical shifts ( $\delta$ ) are reported in ppm. Tetramethylsilane ( $\delta = 0.00$  ppm for  $^1\text{H}$ ) and  $\text{CDCl}_3$  ( $\delta = 77.00$  ppm for  $^{13}\text{C}$ ) were used as the internal standard. Scalar coupling constants ( $J$ ) are reported in hertz (Hz). The following abbreviations are used to designate the multiplicities: s = singlet, d = doublet, t = triplet, dd = doublet of doublet, ddd = doublet of doublet of doublet, td = triplet of doublet, m = multiplet, br.s = broad singlet. Mass spectral data were compiled using MS (ESI), and High resolution mass spectra (HRMS) were recorded by ESI probe in positive mode using ORBITRAP analyser. Optical rotations were recorded on high sensitive polarimeter with 1mL cell. The enantiomeric purity was determined by chiral HPLC using Chiral OD-H, AS-H and IA columns.

### General procedure for the synthesis of racemic Weinreb amides 3a-m:

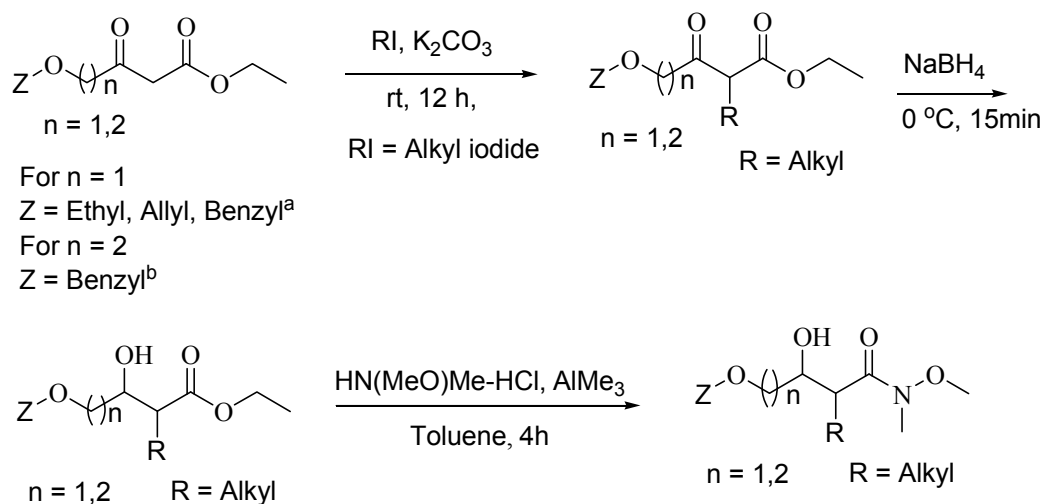

#### Ethyl 4-(aloxo)-2-alkyl-3-oxobutanoate:

To a stirred solution of aloxy keto ester (1 mmol) and K<sub>2</sub>CO<sub>3</sub> (2.5 mmol) in acetone, Alkyl iodide (2 mmol) was added allowed to stir for 12 h at room temperature. The reaction mixture was quenched and filtered through cellite pad and concentrated to give crude residue. The crude residue was purified by column chromatography using hexane / ethyl acetate (95/5) as an eluent, Yield: 60 - 88%.

#### Ethyl 4-(aloxo)-3-hydroxy-2-alkylbutanoate:

To a stirred solution of Ethyl 4-(aloxo)-2-alkyl-3-oxobutanoate (1 mmol) in methanol, NaBH<sub>4</sub> (0.3 mmol) was added allowed to stir for 15min at 0 °C. The reaction mixture was quenched with aq.NH<sub>4</sub>Cl, extracted with EtOAc, dried, and concentrated to give crude residue. The crude residue was purified by column chromatography using hexane / ethyl acetate (90/10) as an eluent, Yield: 80- 95%.

#### 4-(aloxo)-N-methoxy-N-methyl 2-alkyl -3-oxobutanamide :

To a suspension of *N,O*-dimethylhydroxylamine hydrochloride (2.50 mmol) in benzene, was added trimethyl aluminium (2.50 mmol, 2M in toluene) was added dropwise at 0 °C and the resulting solution was stirred at rt for 1 h. To this Ethyl 4-(aloxo)-3-hydroxy-2-alkylbutanoate

(1 mmol) was added, and the resulting reaction mixture was heated to reflux for 3 h. The reaction mixture was cooled to 0 °C, and was quenched with 1N HCl, extracted with DCM, dried over NaSO<sub>4</sub>, and concentrated to give crude residue. The crude residue was purified by column chromatography using hexane / ethyl acetate (70/30) as an eluent, Yield: 60 - 80%.

**References:**

- a) W. Fan, W. Li, X. Ma, X. Tao, X. Li, Y. Yao, X. Xie, Z. Zhang, *J. Org. Chem.* 2011, **76**, 9444-9451;
- b) T. Allen A, J.D. Meese, Y.L. Huerou, B. Steven A, R. Todd T, G. Steven S, G. Indrani, K. Tomas, S. Francis, C. Kevin, L. Joseph P, *Bioorg. Med. Chem. Lett.* 2008, **18**, 509-512.

## $^1\text{H}$ NMR and $^{13}\text{C}$ NMR Spectr's:

### $^1\text{H}$ NMR spectra of, **3b** (300 MHz):

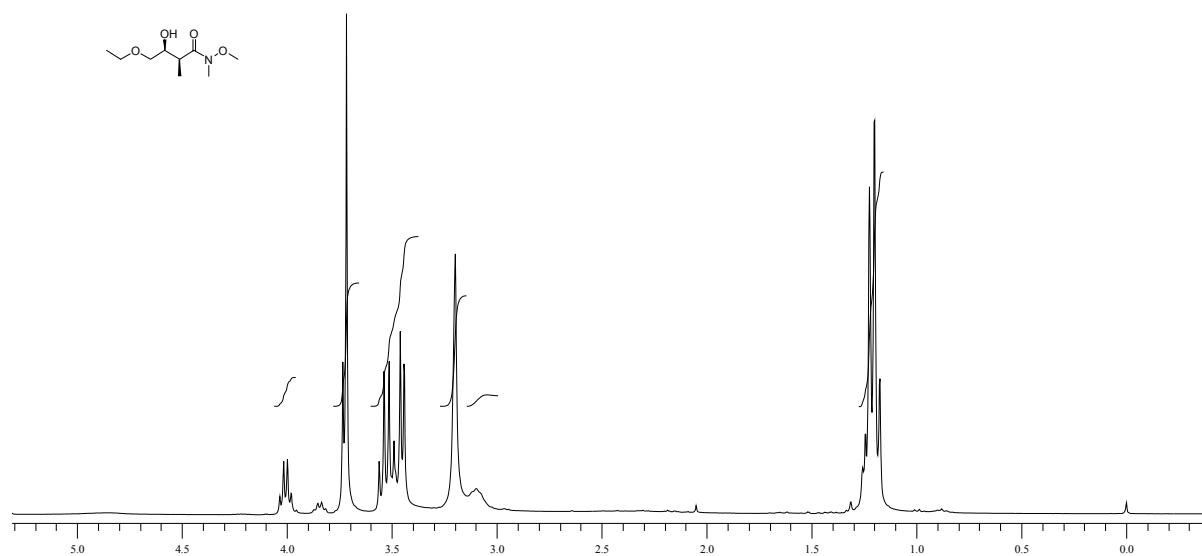

### $^{13}\text{C}$ NMR of compound **3b** (75 MHz):

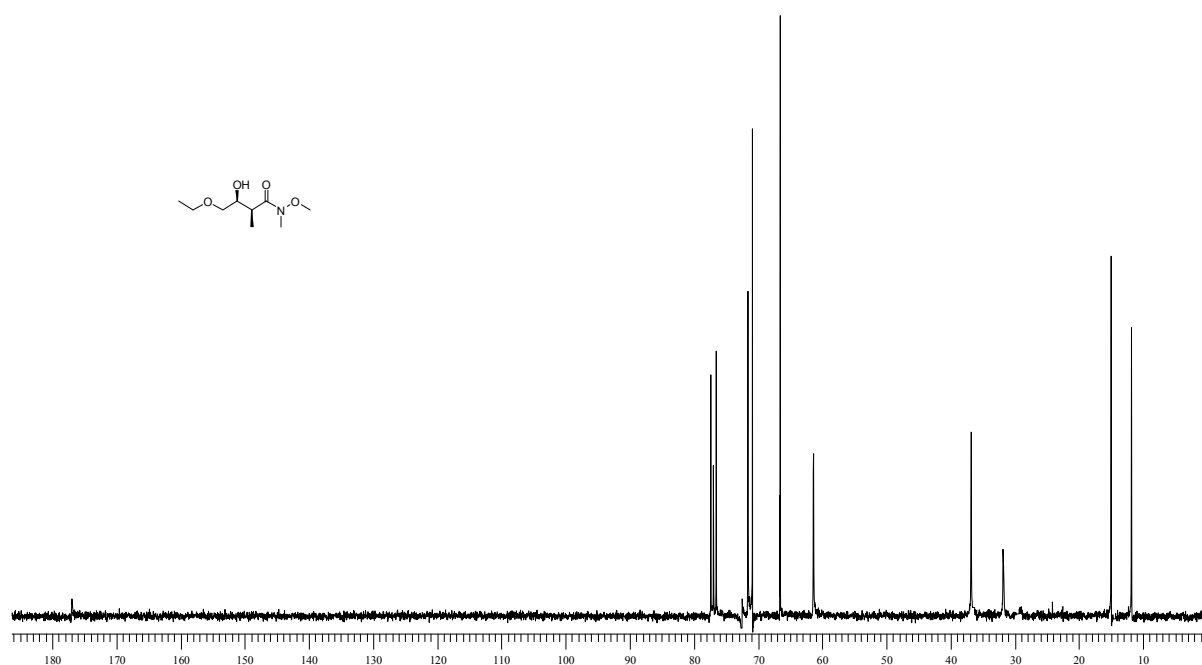

### $^1\text{H}$ NMR spectra of, 3c (300 MHz)

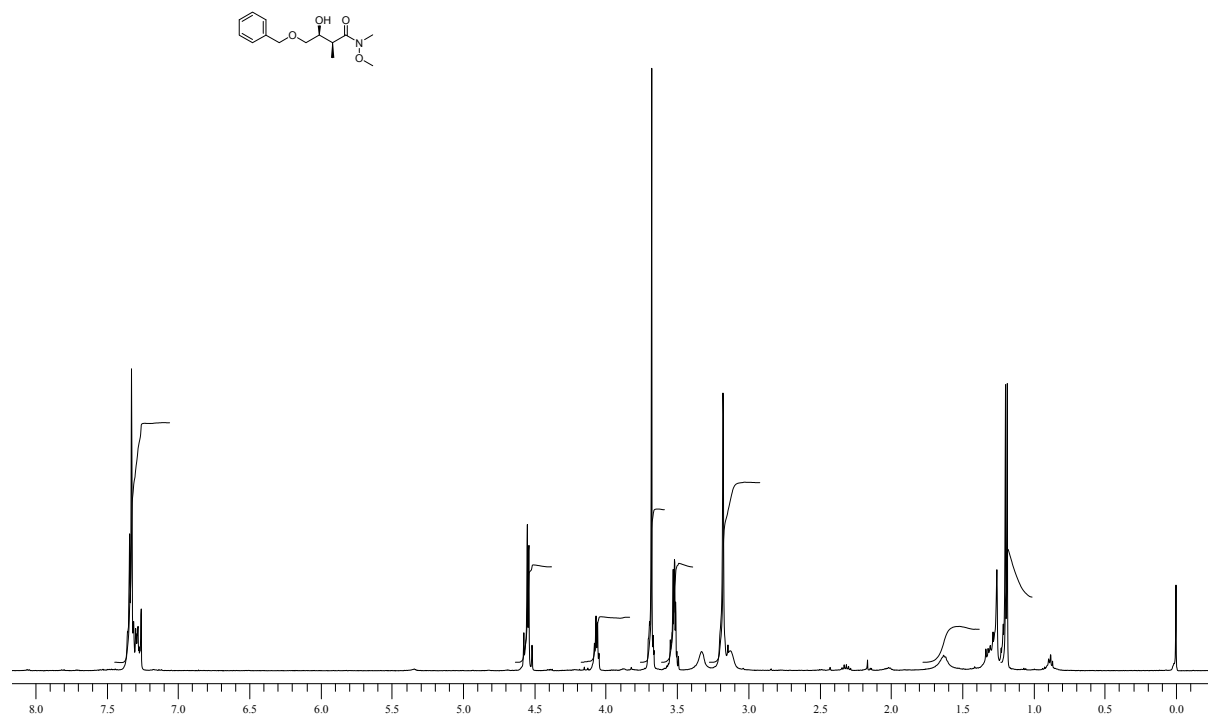

### $^{13}\text{C}$ NMR of compound, 3c (75 MHz)

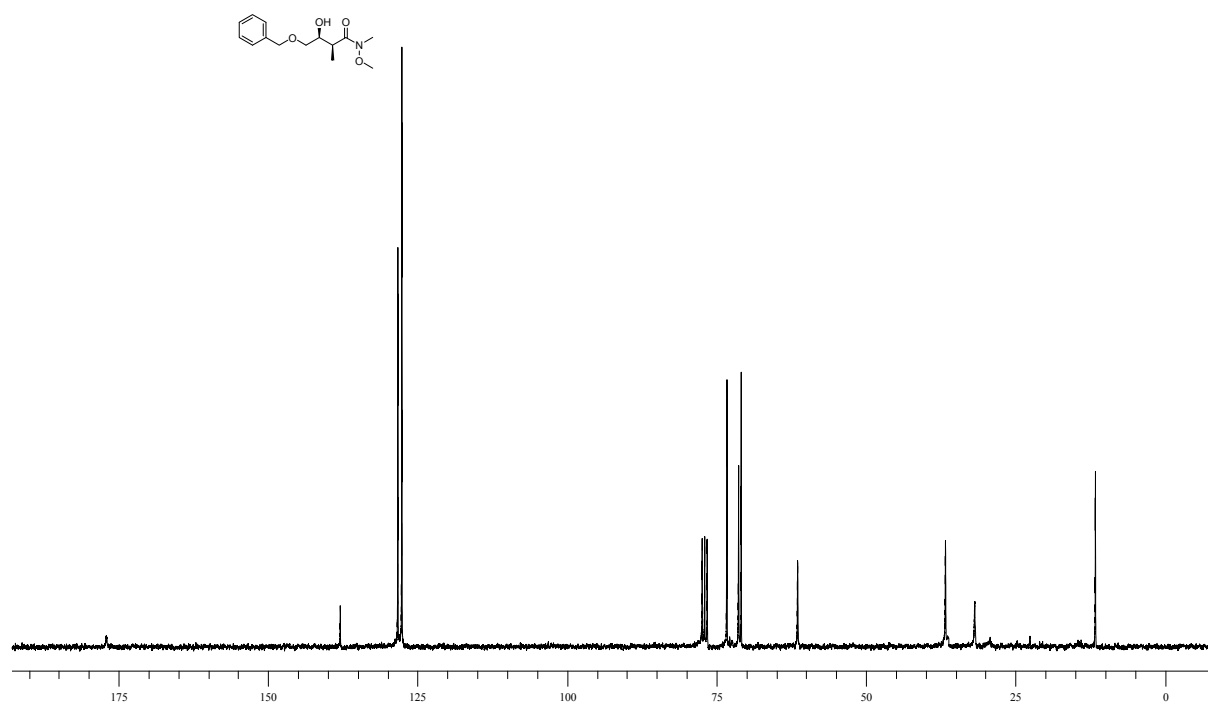

**<sup>1</sup>H NMR spectra of, 3d (500 MHz):**

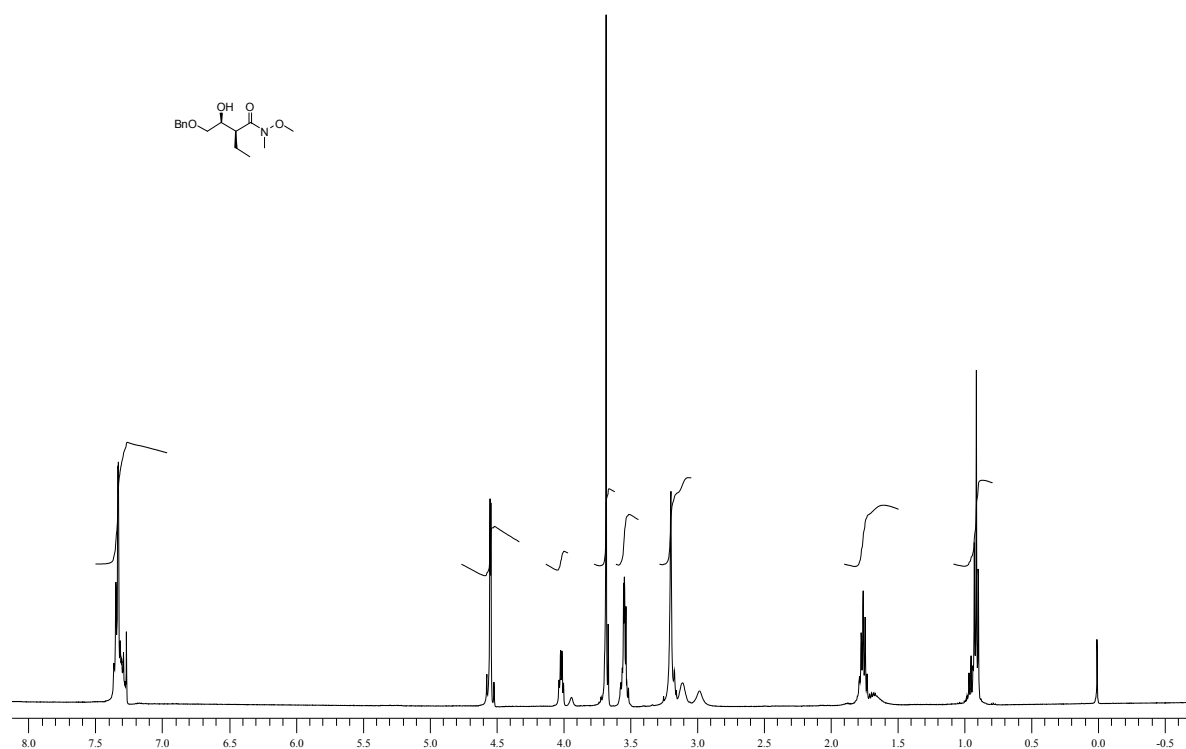

**<sup>13</sup>C NMR of compound 3d (75 MHz):**

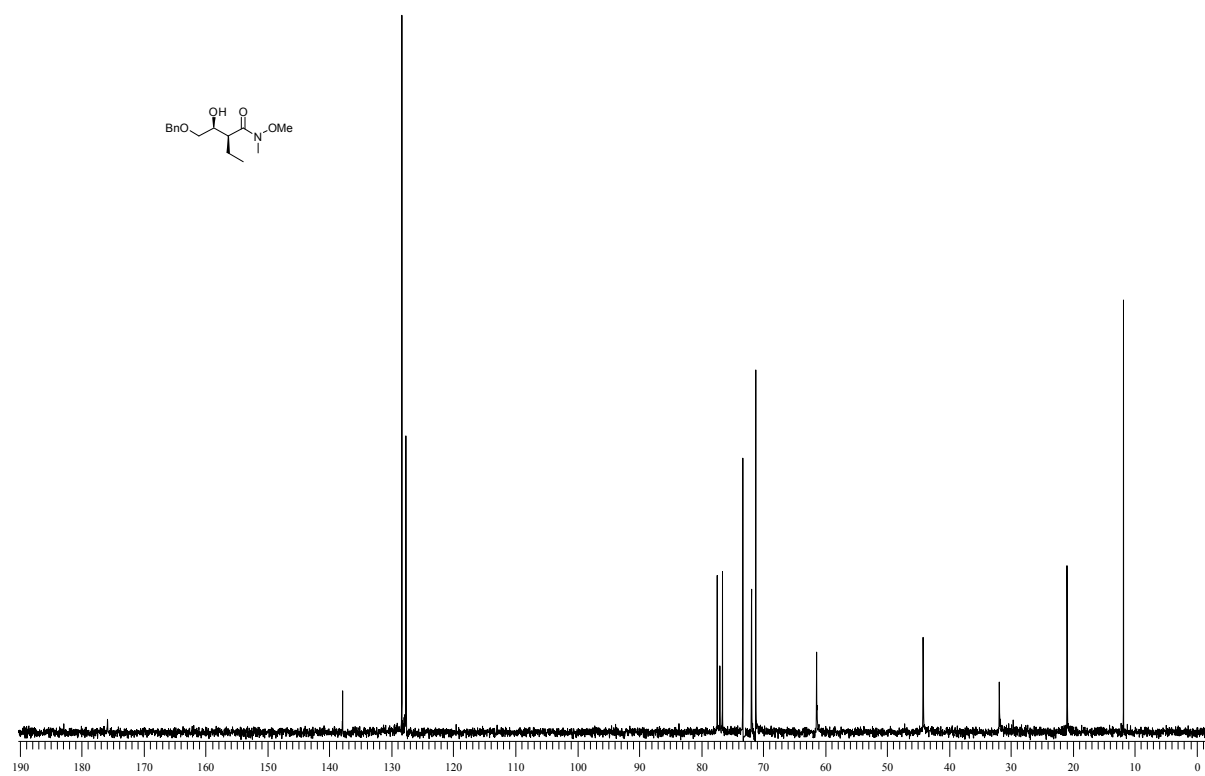

**<sup>1</sup>H NMR spectra of, 3e (500 MHz):**

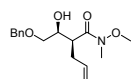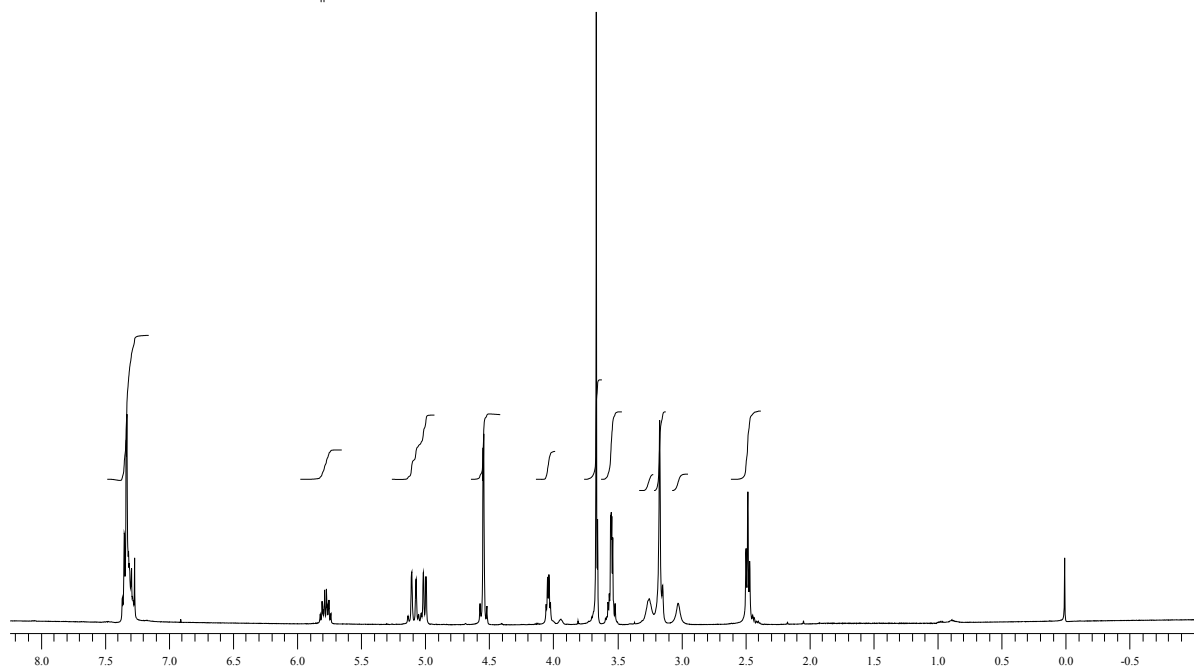

**<sup>13</sup>C NMR of compound 3e (75 MHz):**

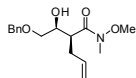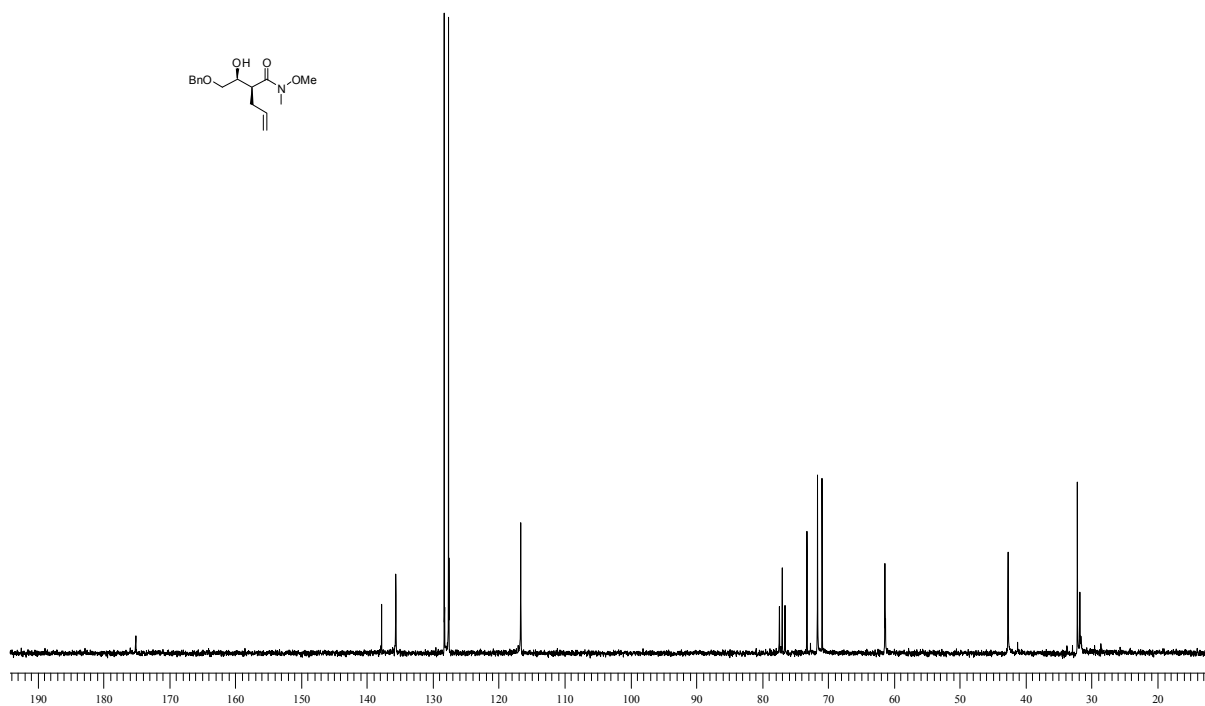



**<sup>1</sup>H NMR spectra of, 3f (500 MHz):**

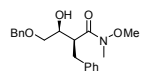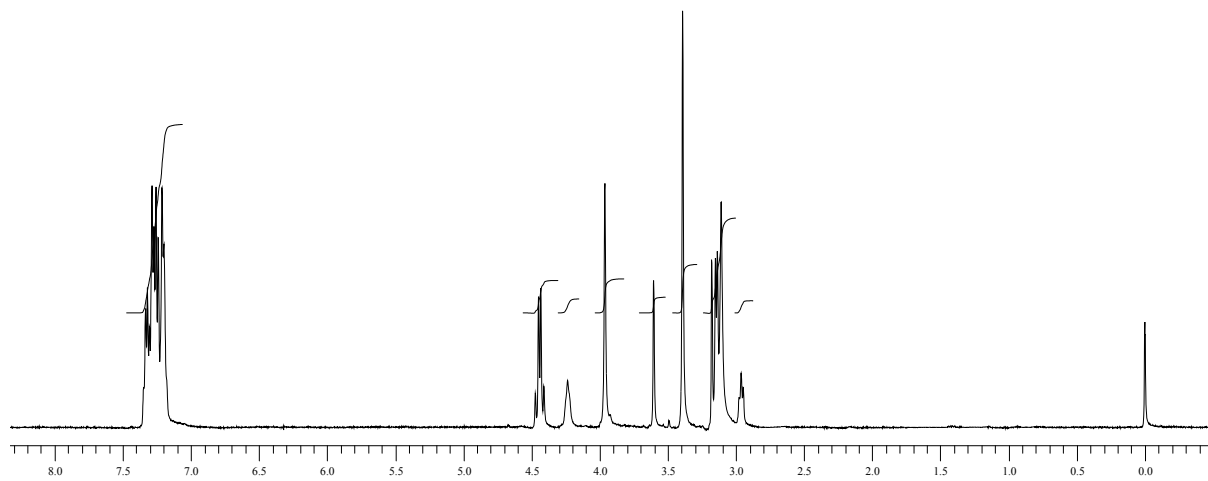

**<sup>13</sup>C NMR of compound 3f (75 MHz):**

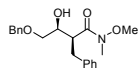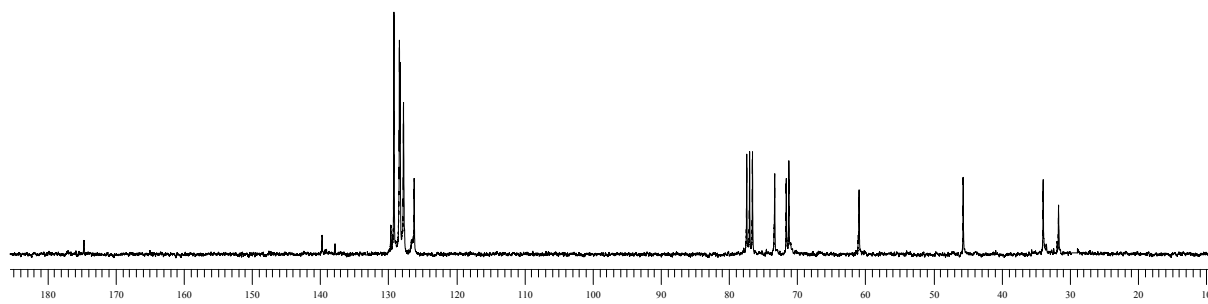

**<sup>1</sup>H NMR spectra of, 3g (300 MHz):**

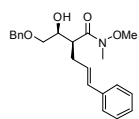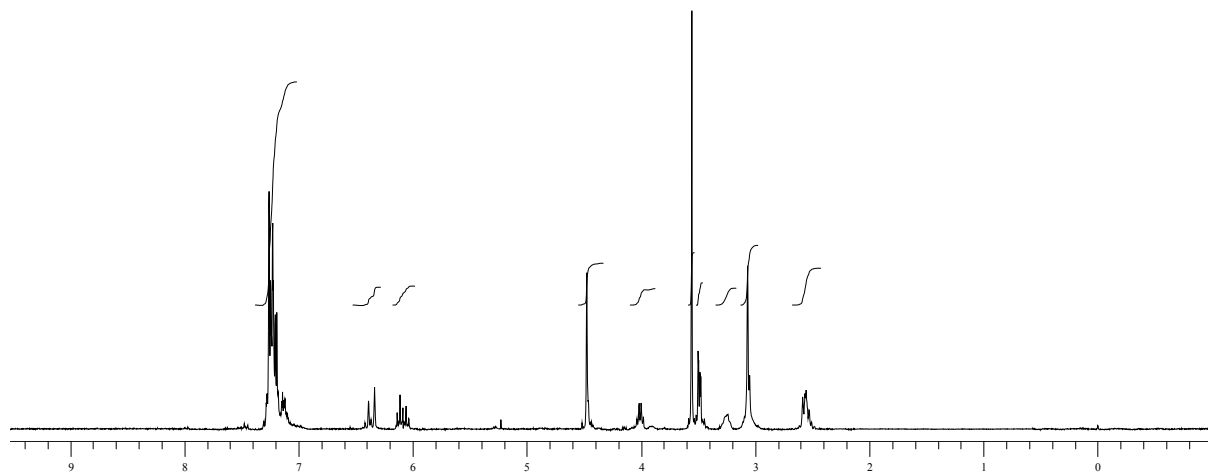

**<sup>13</sup>C NMR of compound 3g (75 MHz):**

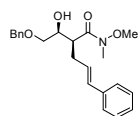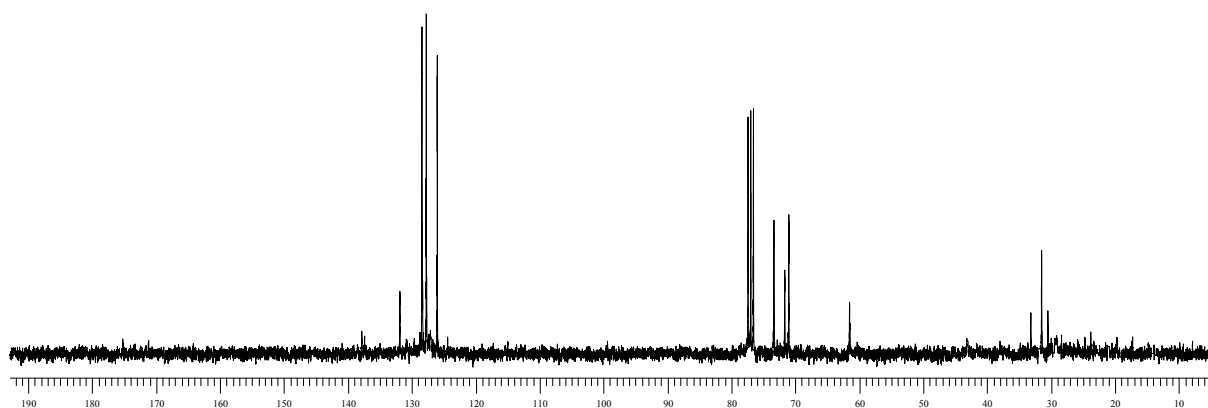

**<sup>1</sup>H NMR spectra of, 3h (300 MHz):**

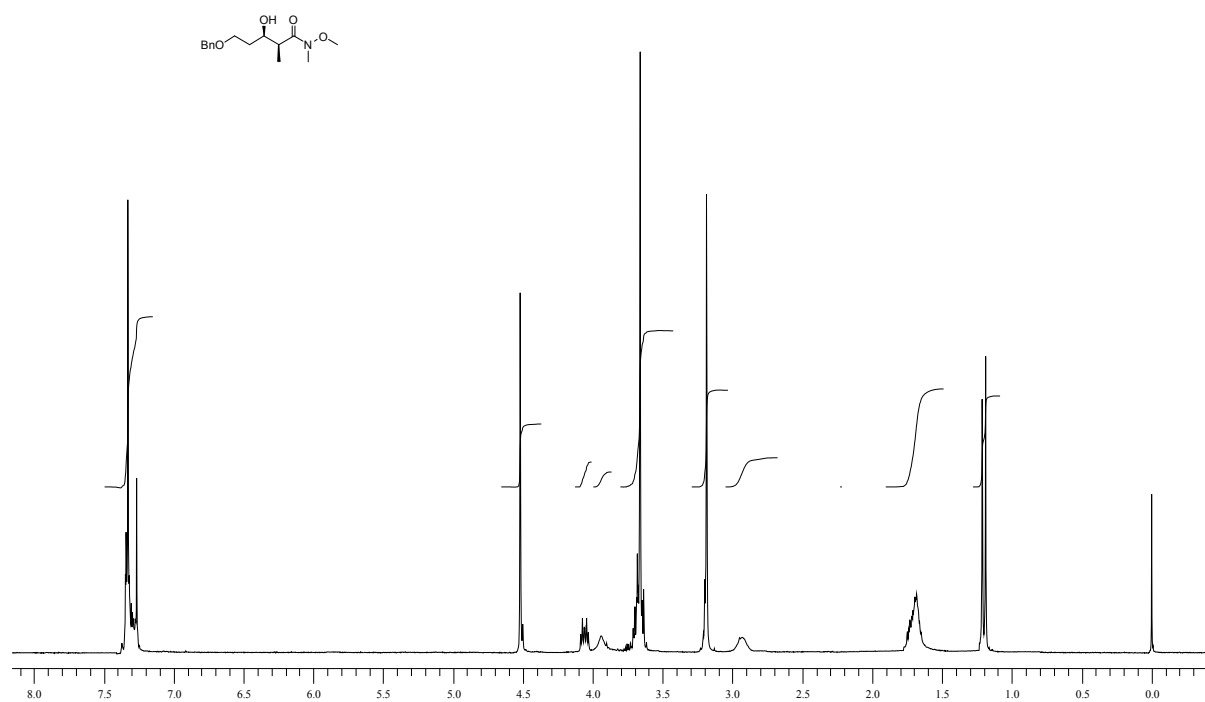

**<sup>13</sup>C NMR of compound 3h (75 MHz):**

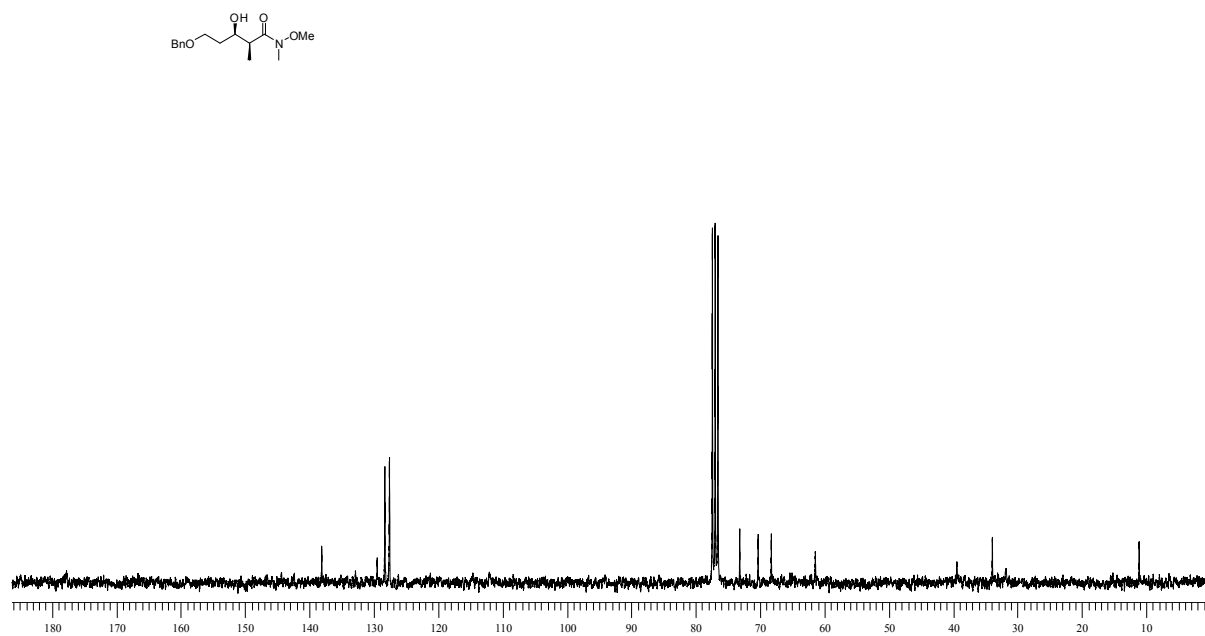

**<sup>1</sup>H NMR spectra of, 3i (300 MHz):**

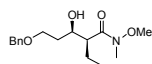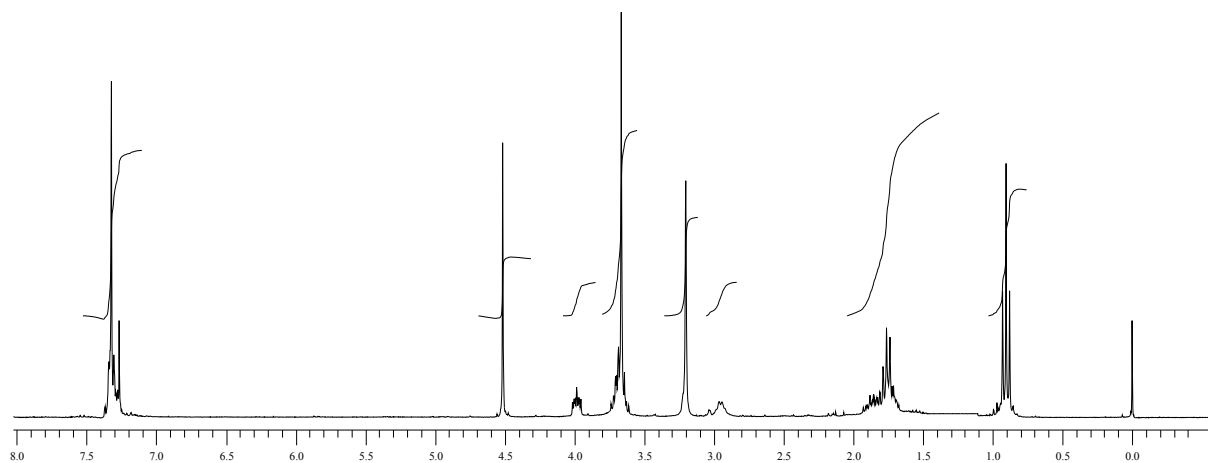

**<sup>13</sup>C NMR of compound 3i (75 MHz):**

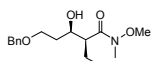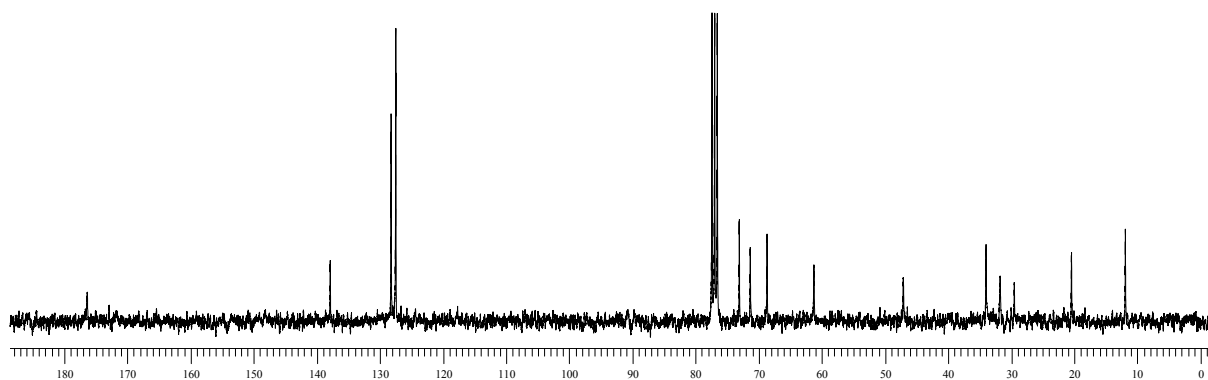

**<sup>1</sup>H NMR spectra of, 3j (500 MHz):**

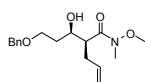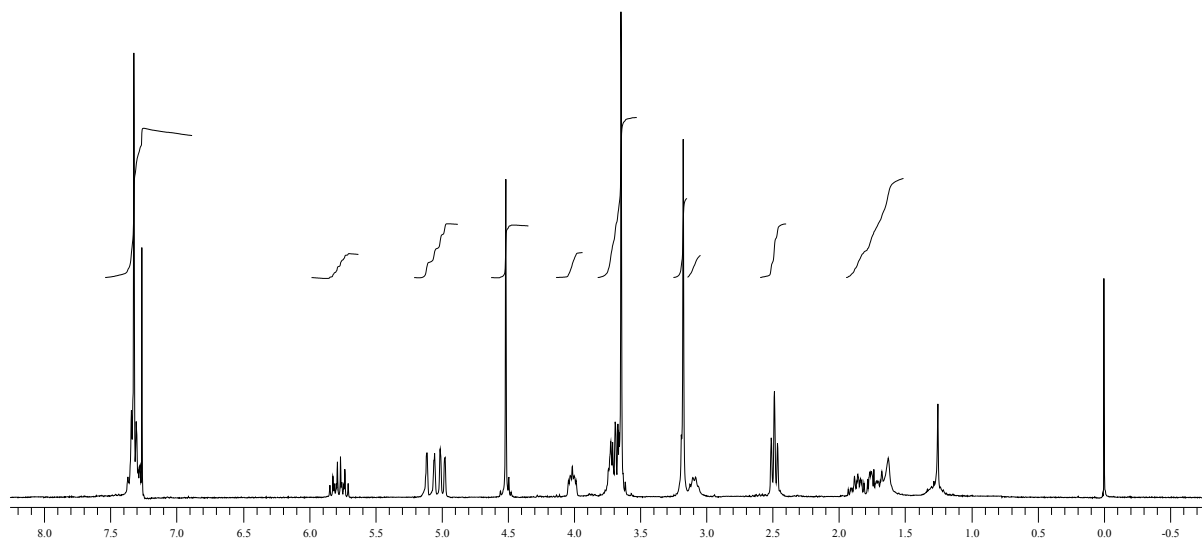

**<sup>13</sup>C NMR of compound 3j (75 MHz)::**

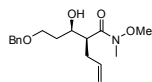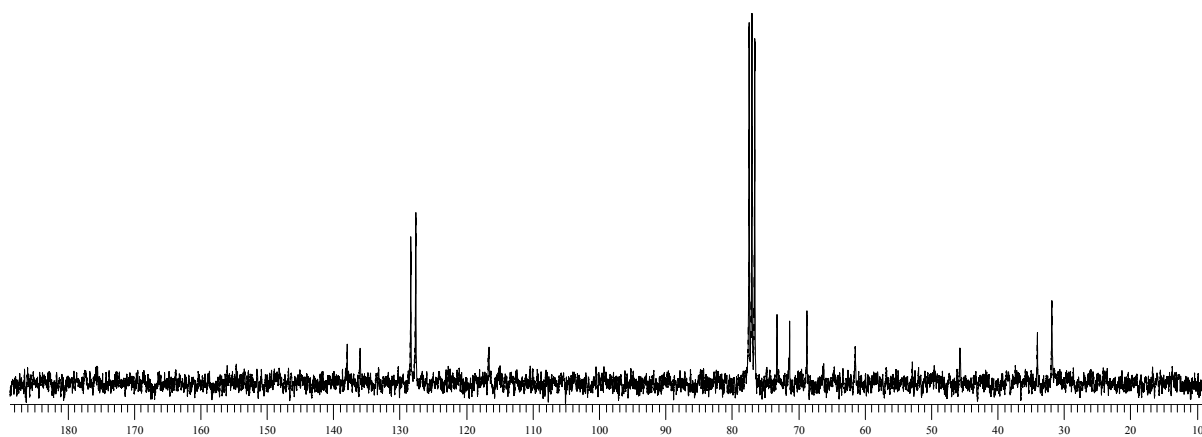

**<sup>1</sup>H NMR spectra of, 3k (500 MHz):**

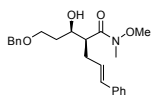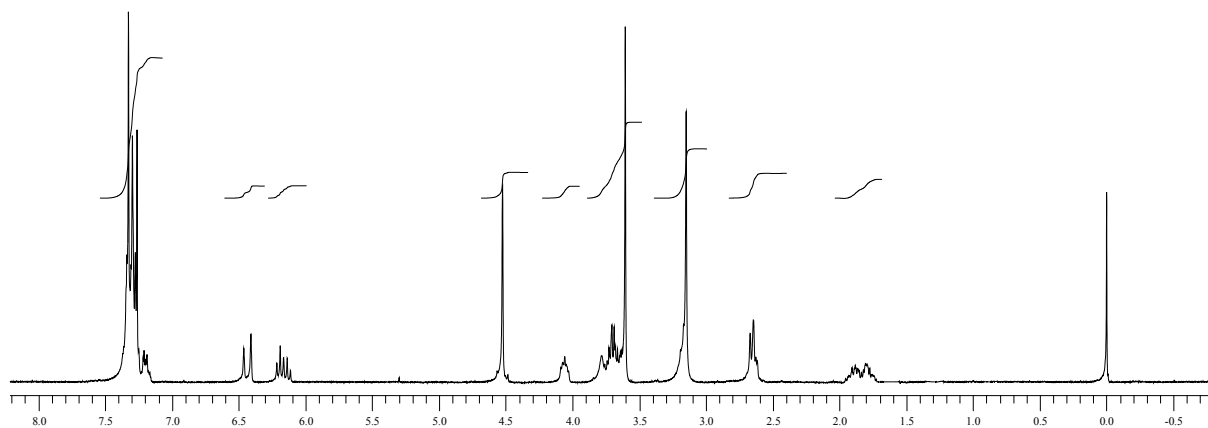

**<sup>13</sup>C NMR of compound 3k (75 MHz):**

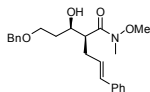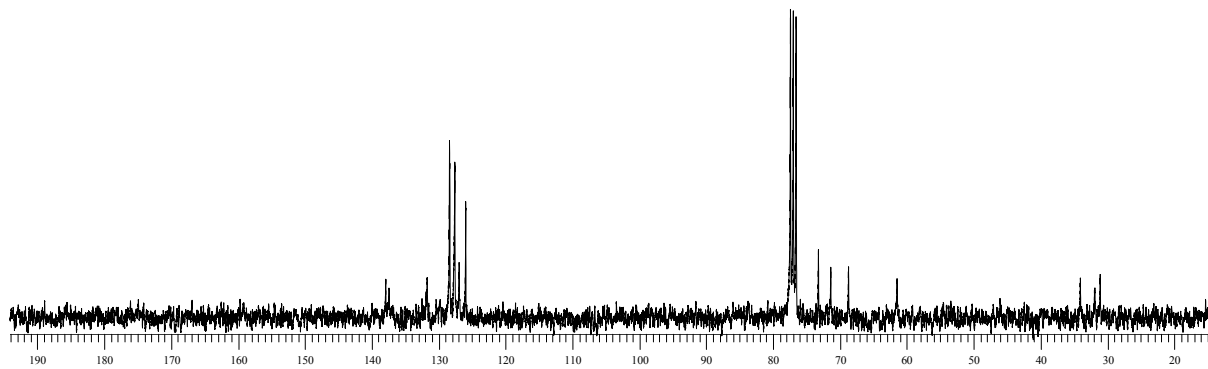

**<sup>1</sup>H NMR spectra of, 31 (300 MHz):**

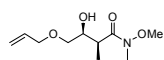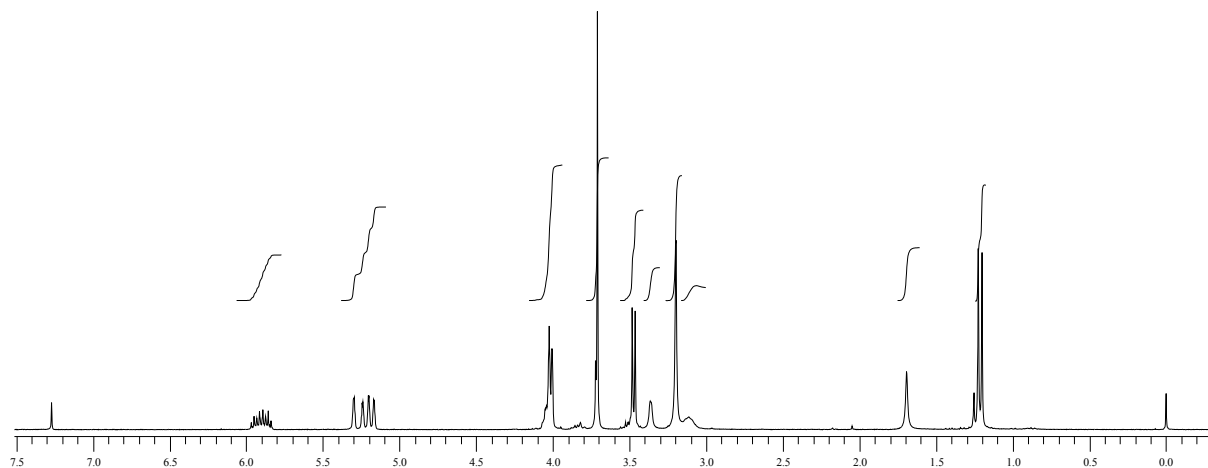

**<sup>13</sup>C NMR of compound 31 (75 MHz):**

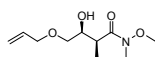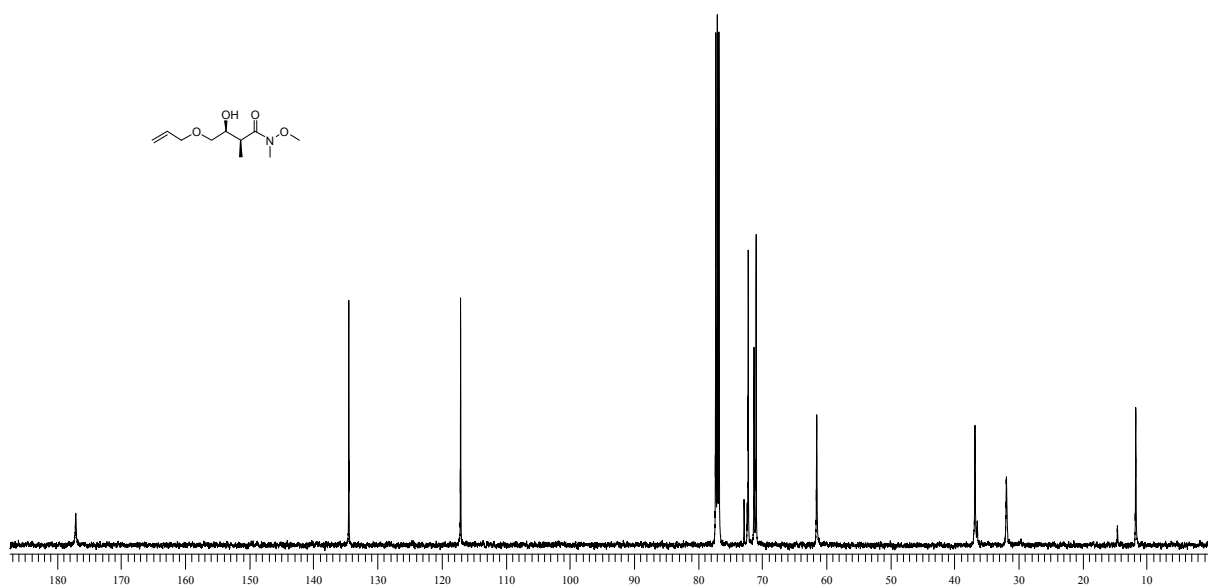

**<sup>1</sup>H NMR spectra of, 3m (500 MHz):**

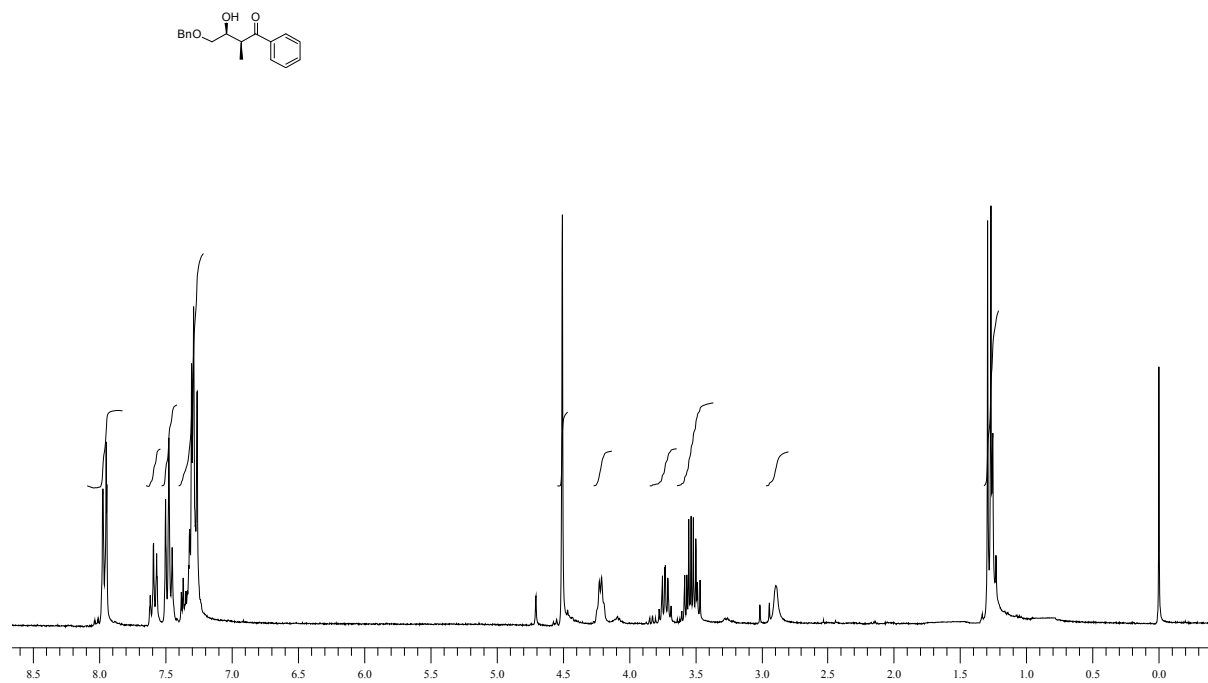

**<sup>13</sup>C NMR of compound 3m (75 MHz):**

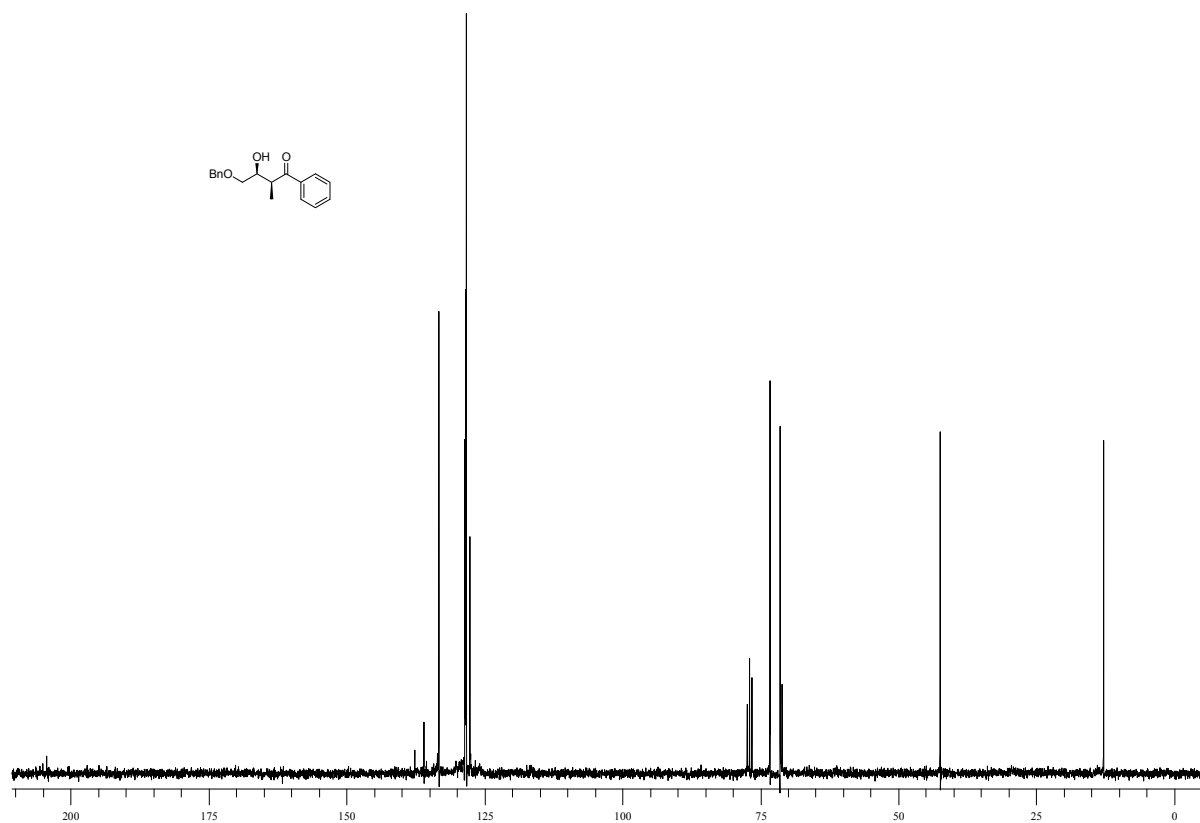



**<sup>1</sup>H NMR spectra of 3n (300 MHz):**

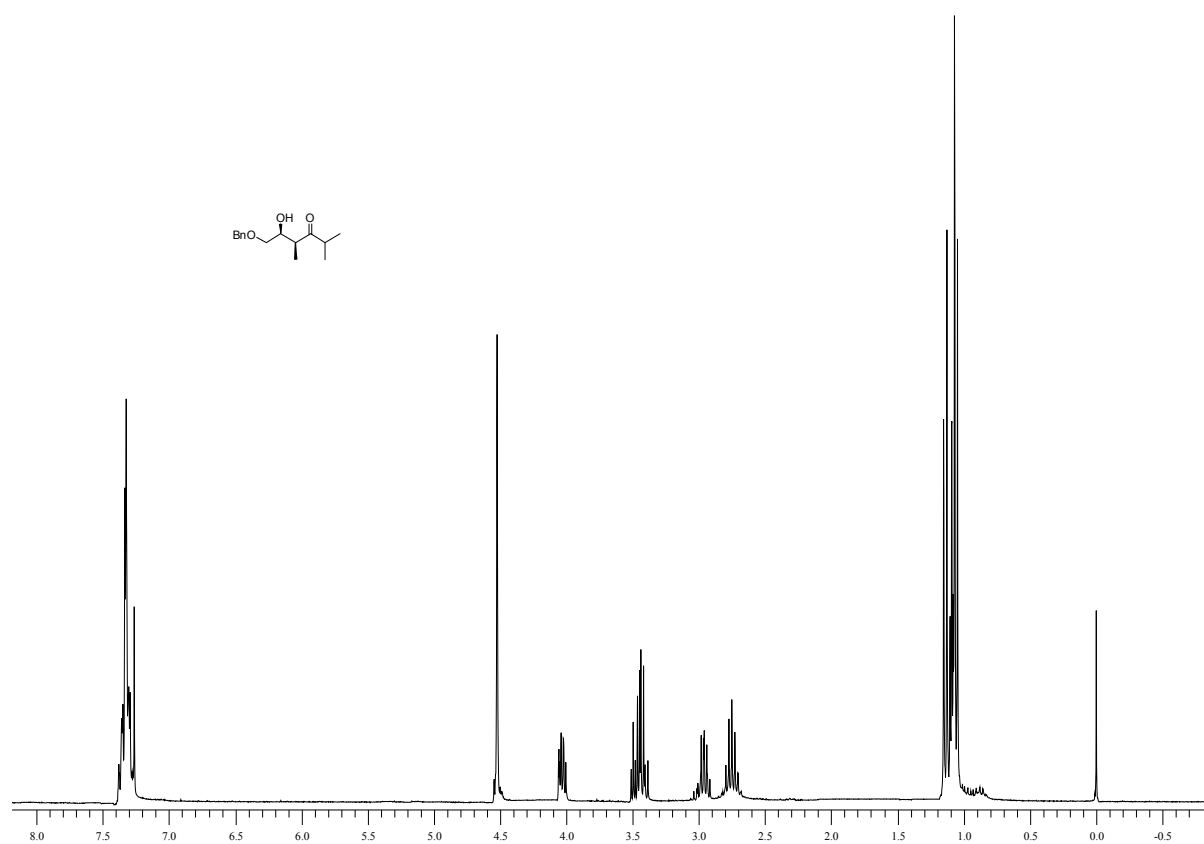

**<sup>13</sup>C NMR of compound 3n (75 MHz):**

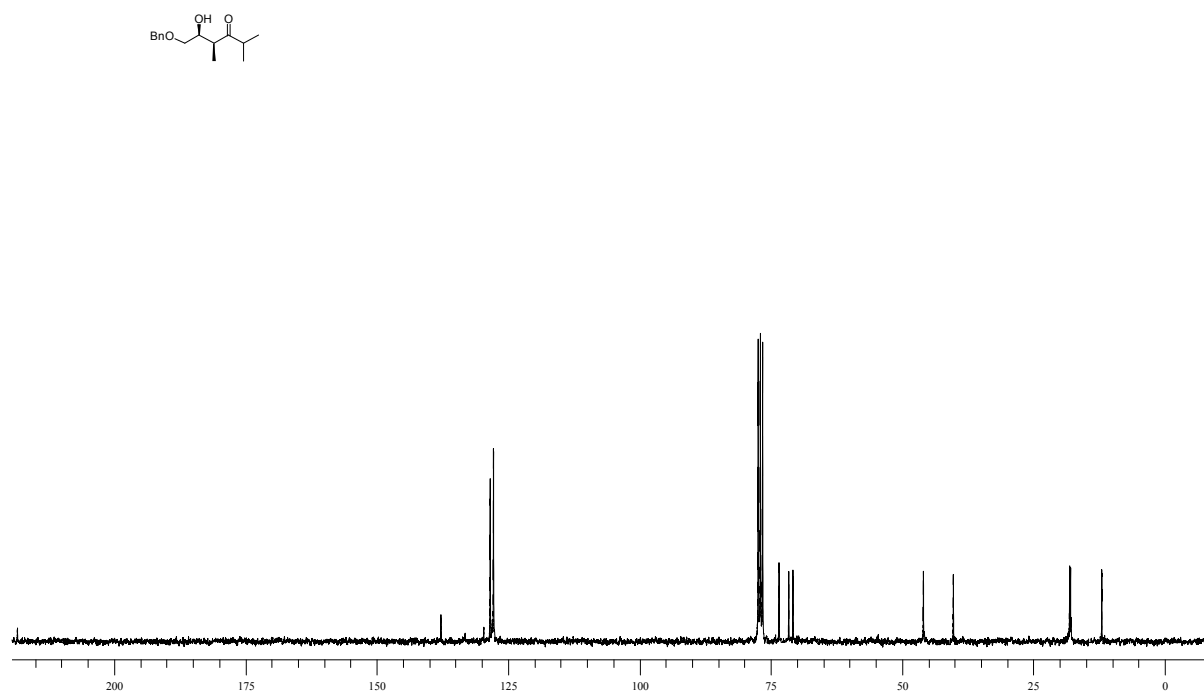

### <sup>1</sup>H NMR spectra (300 MHz)

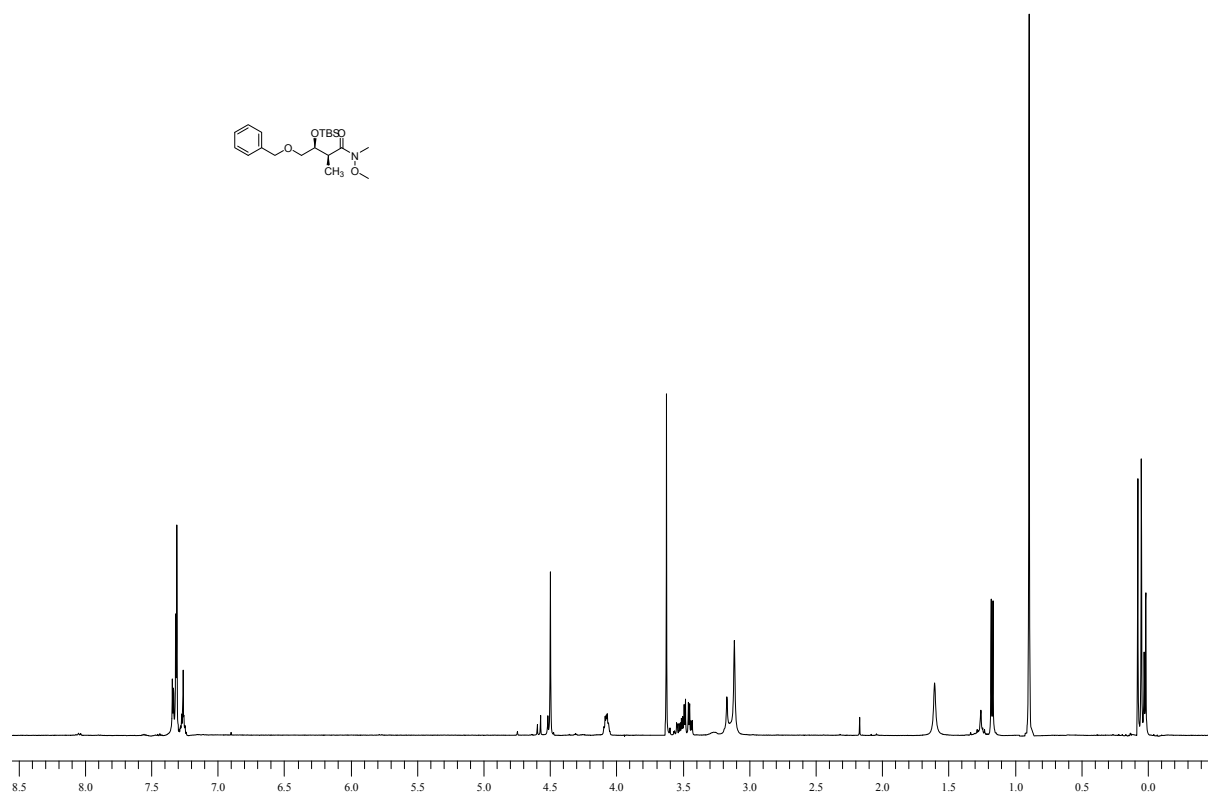

### <sup>13</sup>C NMR of compound (75 MHz)

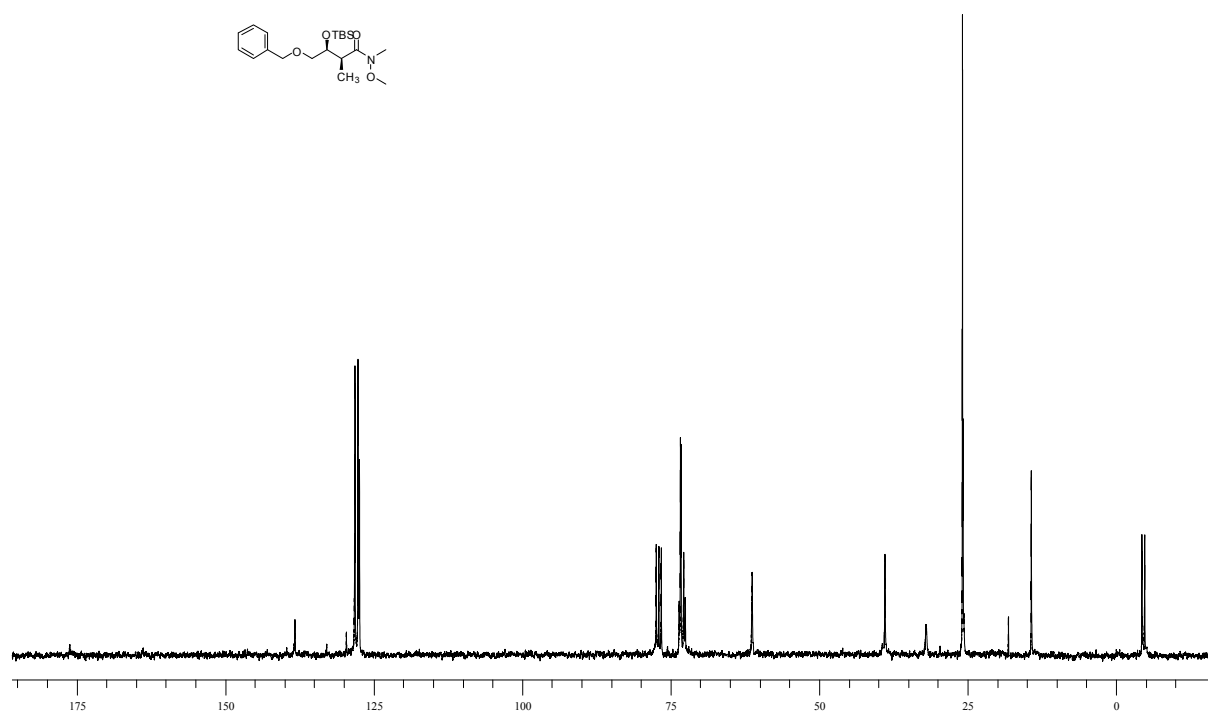

**<sup>1</sup>H NMR spectra of (300 MHz)**

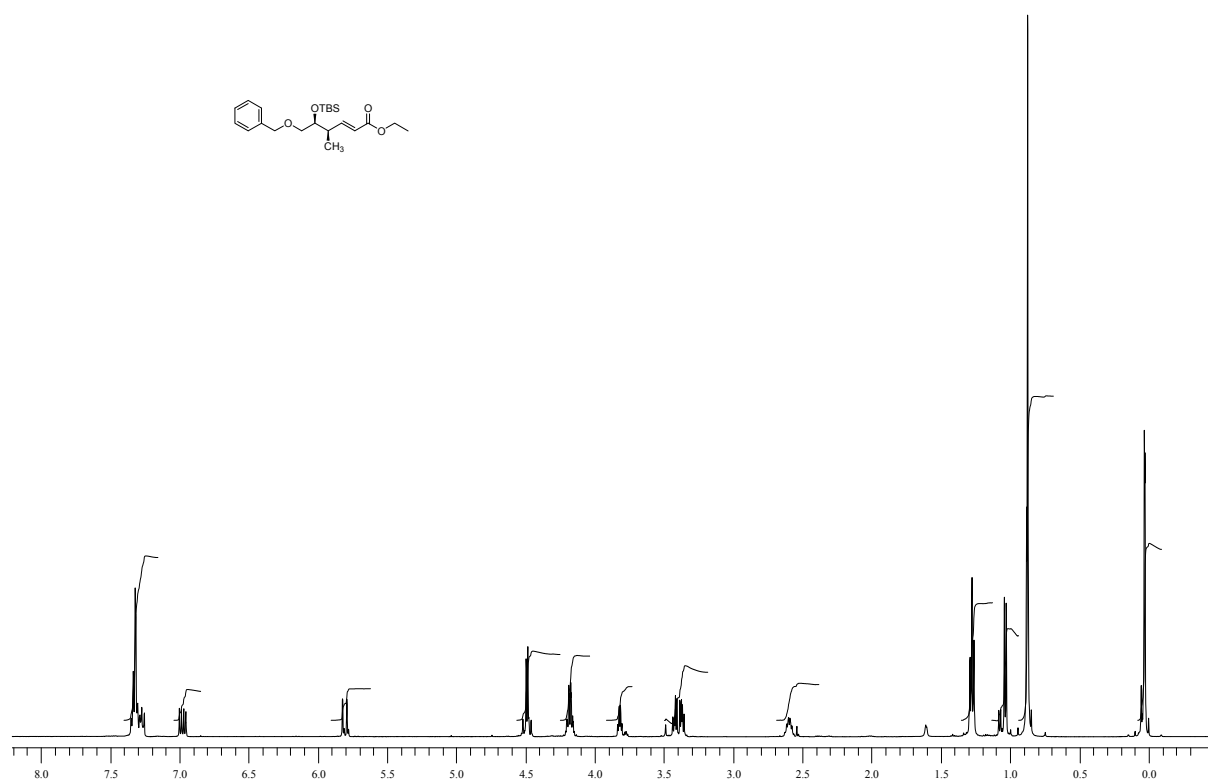

**<sup>13</sup>C NMR of compound (75 MHz)**

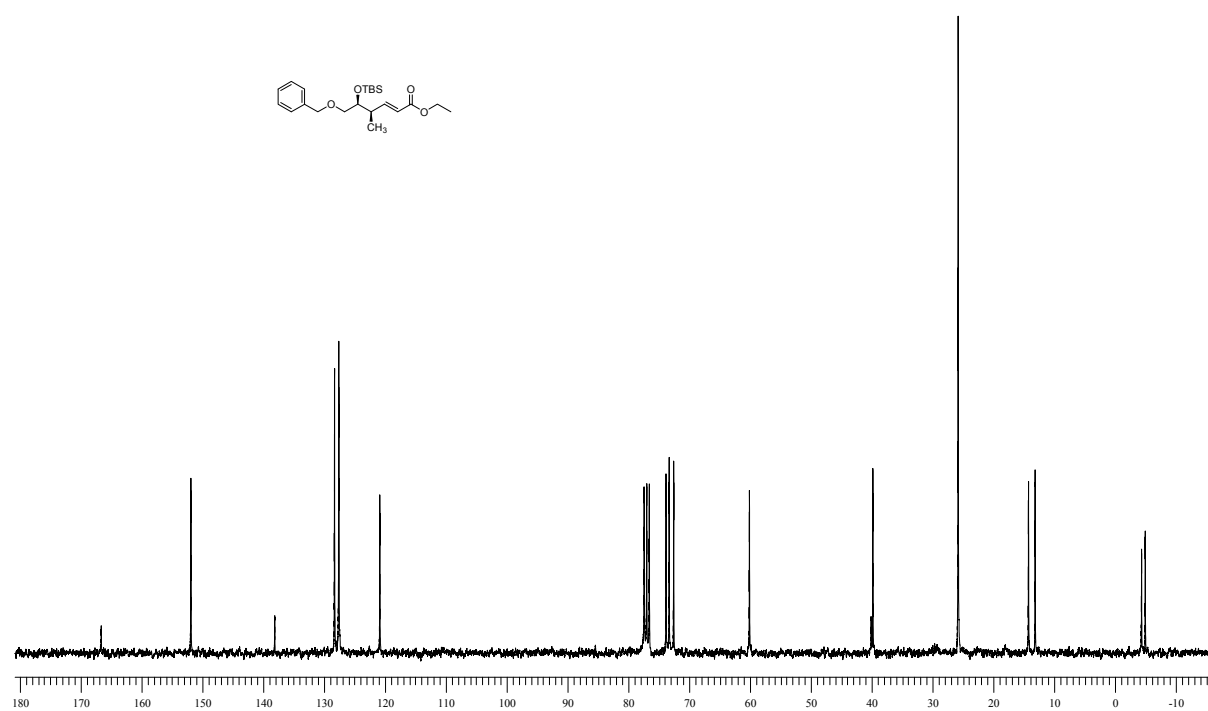

**<sup>1</sup>H NMR spectra of, 4 (300 MHz)**

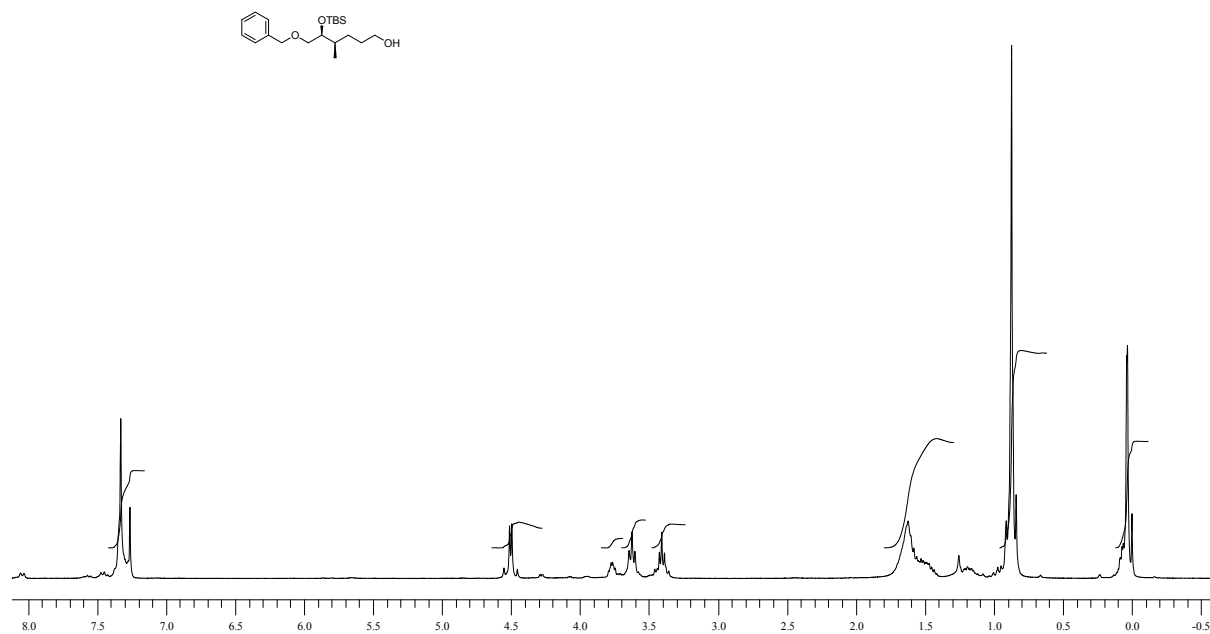

**<sup>13</sup>C NMR of compound, 4 (75 MHz)**

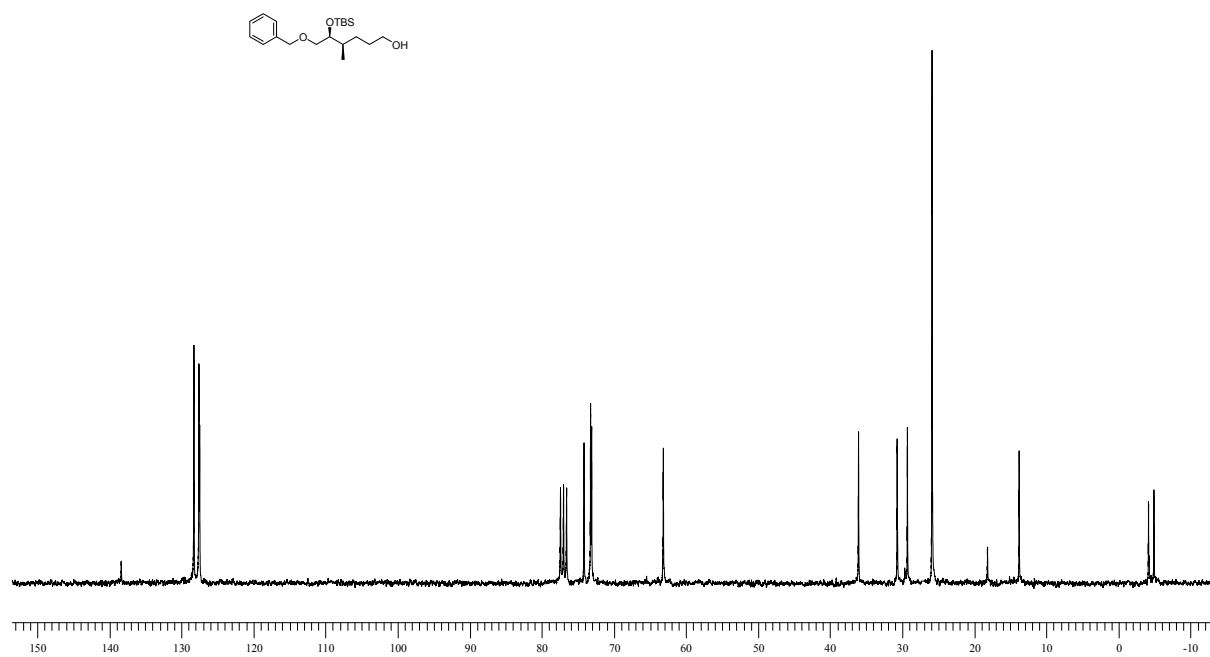

**<sup>1</sup>H NMR spectra of, 5 (300 MHz)**

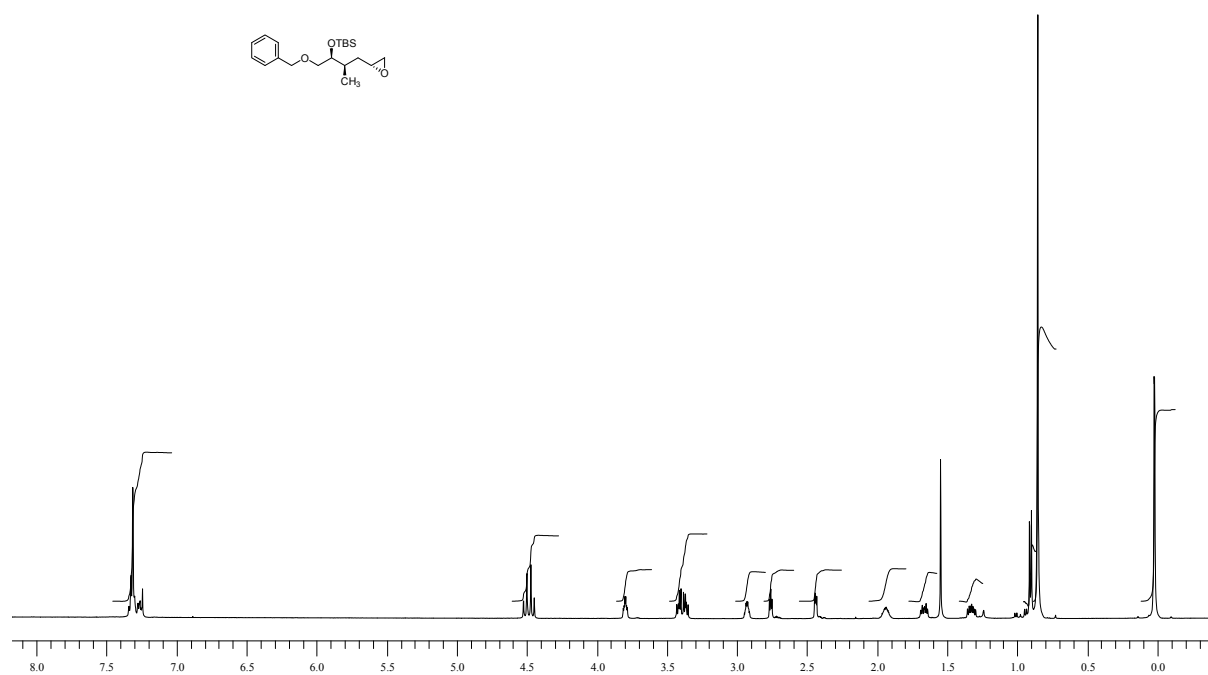

**<sup>13</sup>C NMR of compound, 5 (75 MHz)**

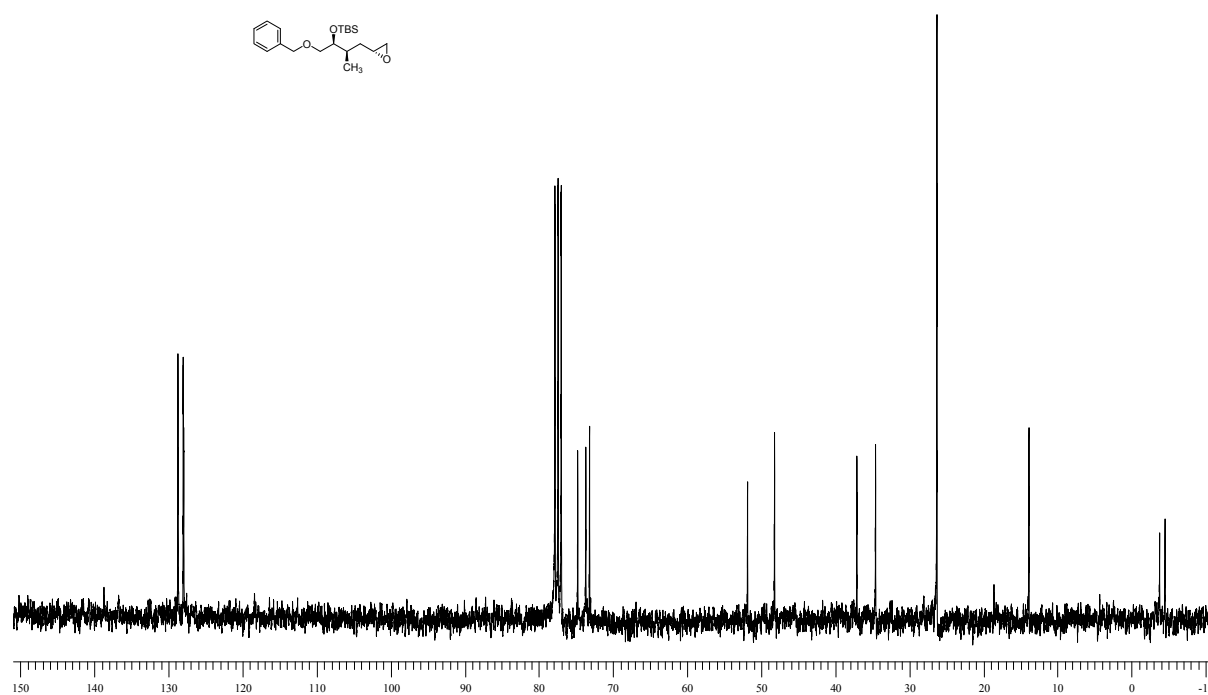

### $^1\text{H}$ NMR spectra (300 MHz)

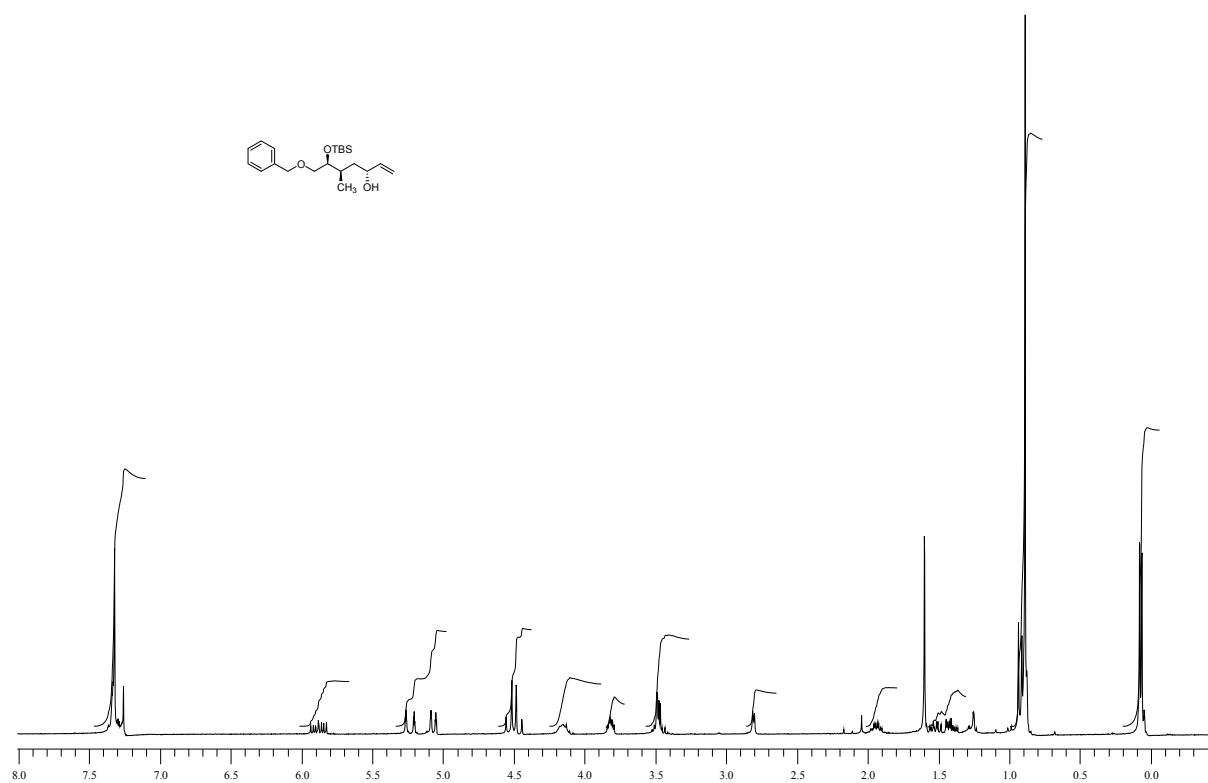

### $^{13}\text{C}$ NMR of compound (75 MHz)

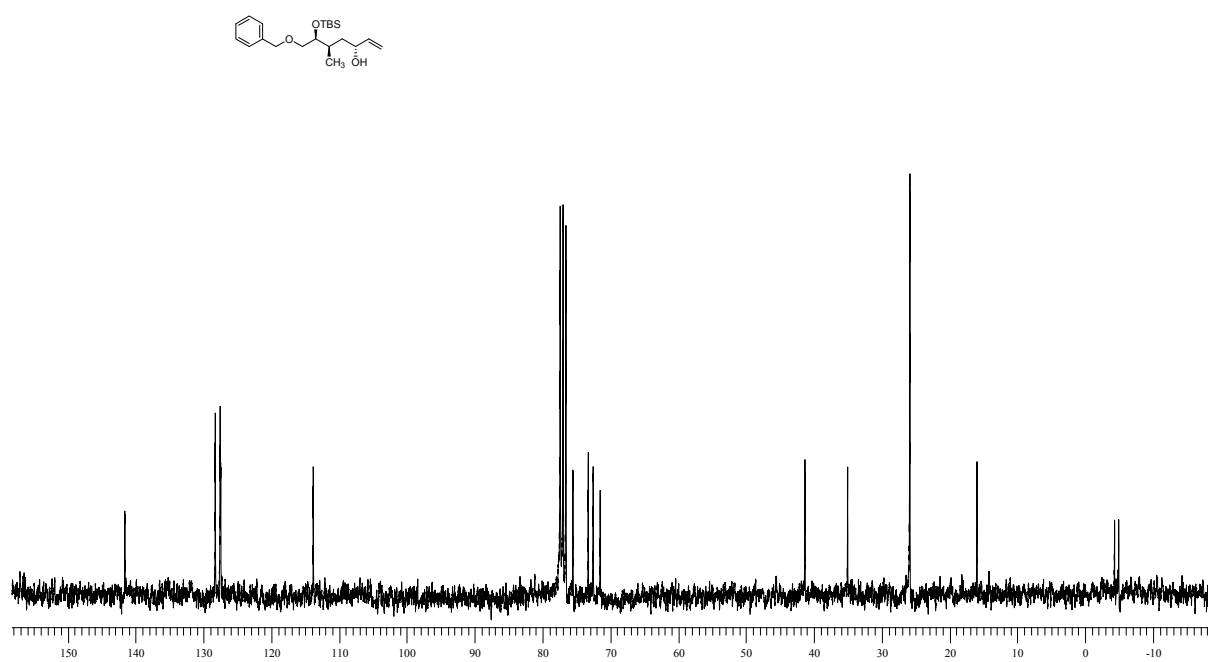

### <sup>1</sup>H NMR spectra of, 6 (300 MHz)

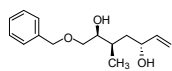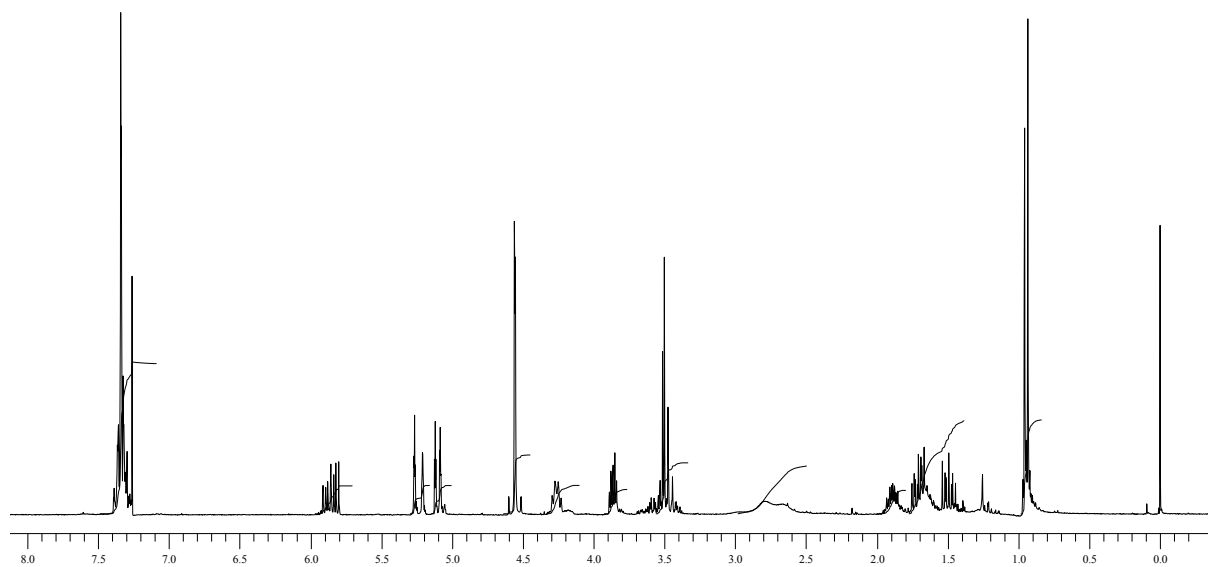

### <sup>13</sup>C NMR of compound, 6 (75 MHz)

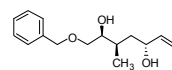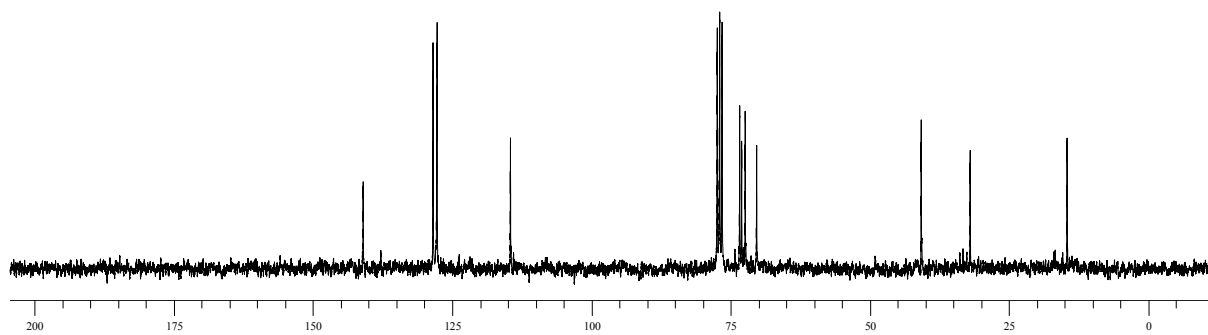

### <sup>1</sup>H NMR spectra of, 7 (300 MHz)

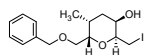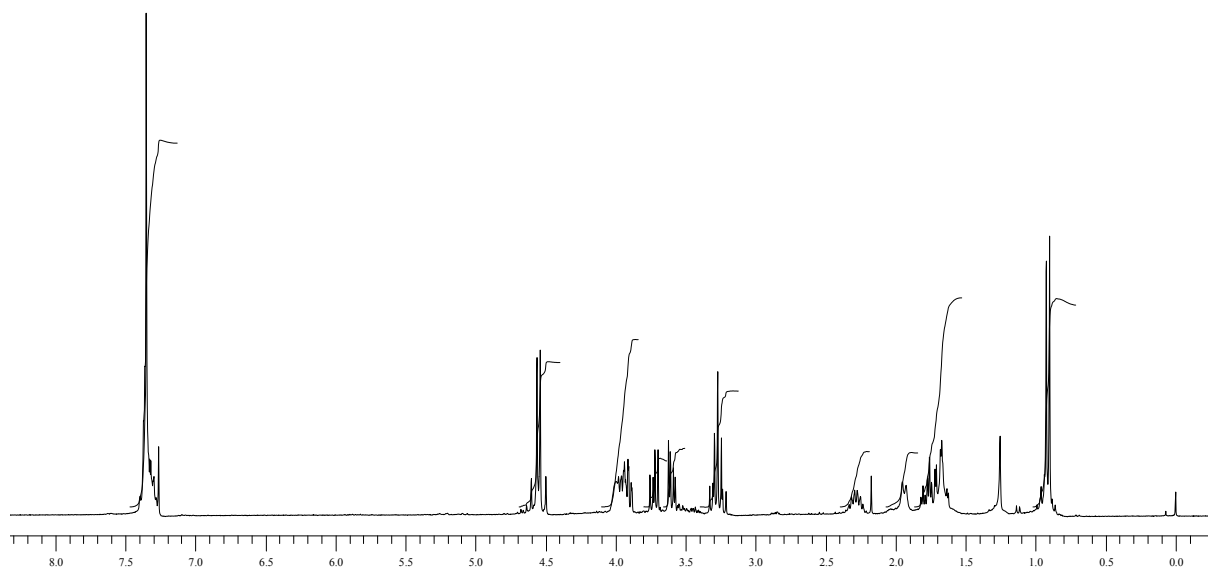

**<sup>13</sup>C NMR of compound, 7 (75 MHz)**

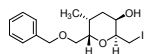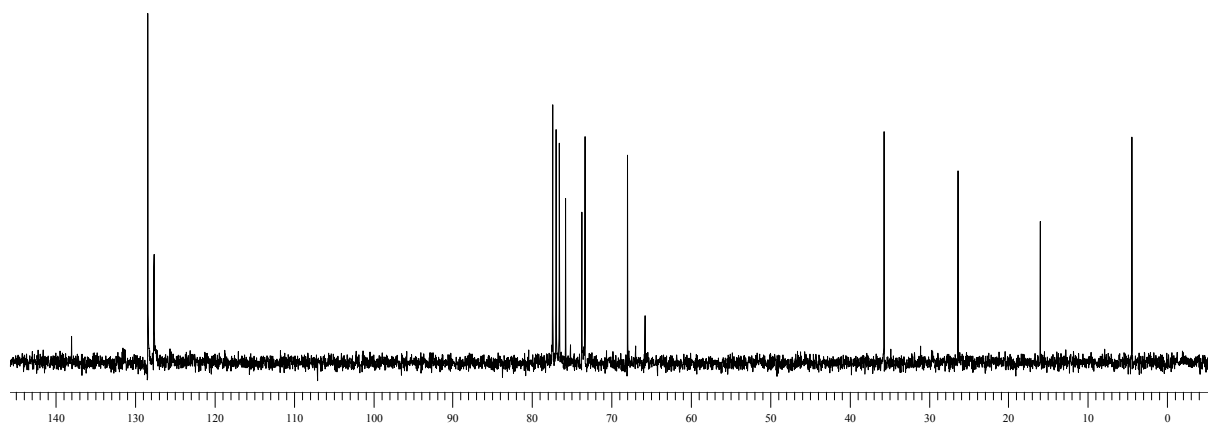



### <sup>1</sup>H NMR spectra (300 MHz)

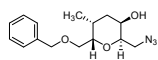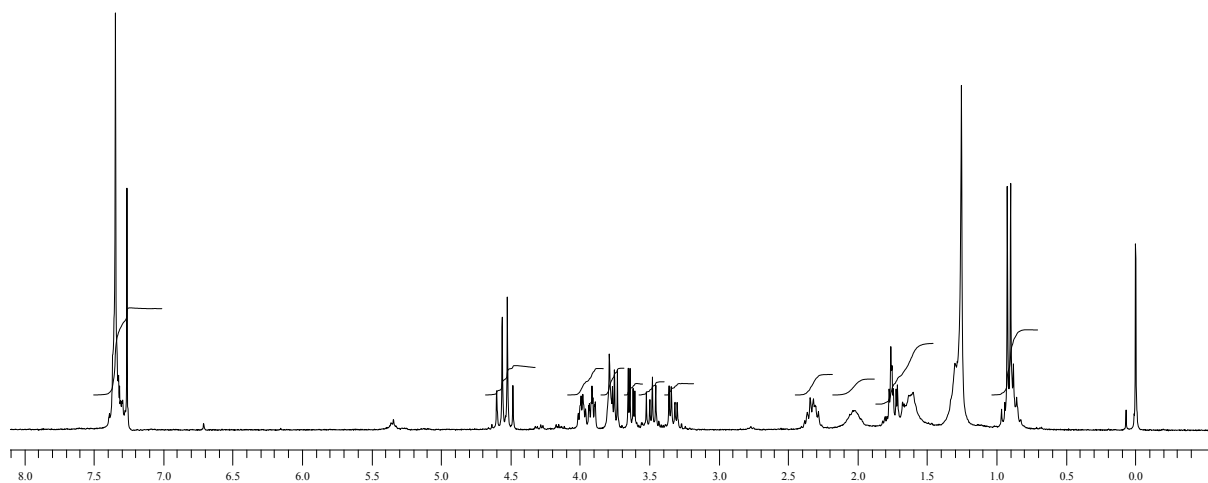

### <sup>13</sup>C NMR of compound (75 MHz)

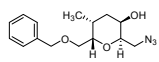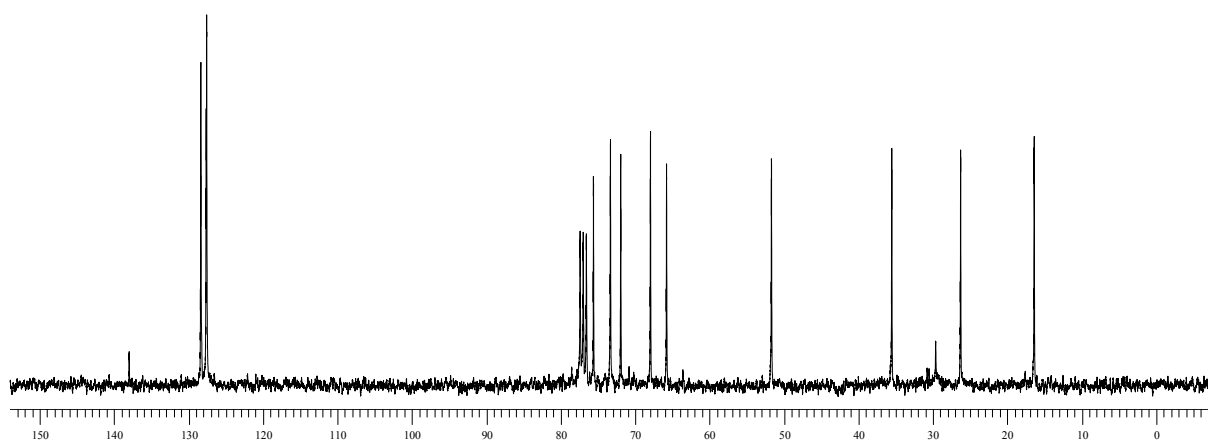

### $^1\text{H}$ NMR spectra of, 8 (300 MHz)

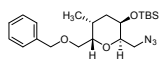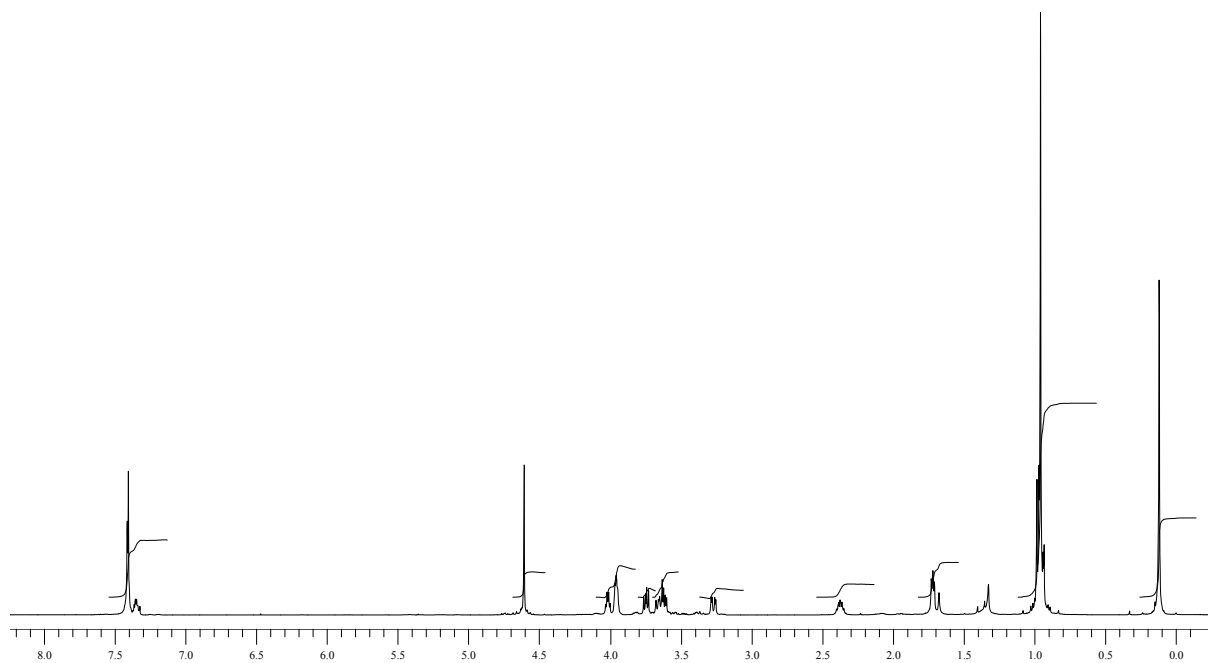

### $^{13}\text{C}$ NMR of compound, 8 (75 MHz)

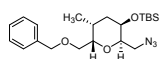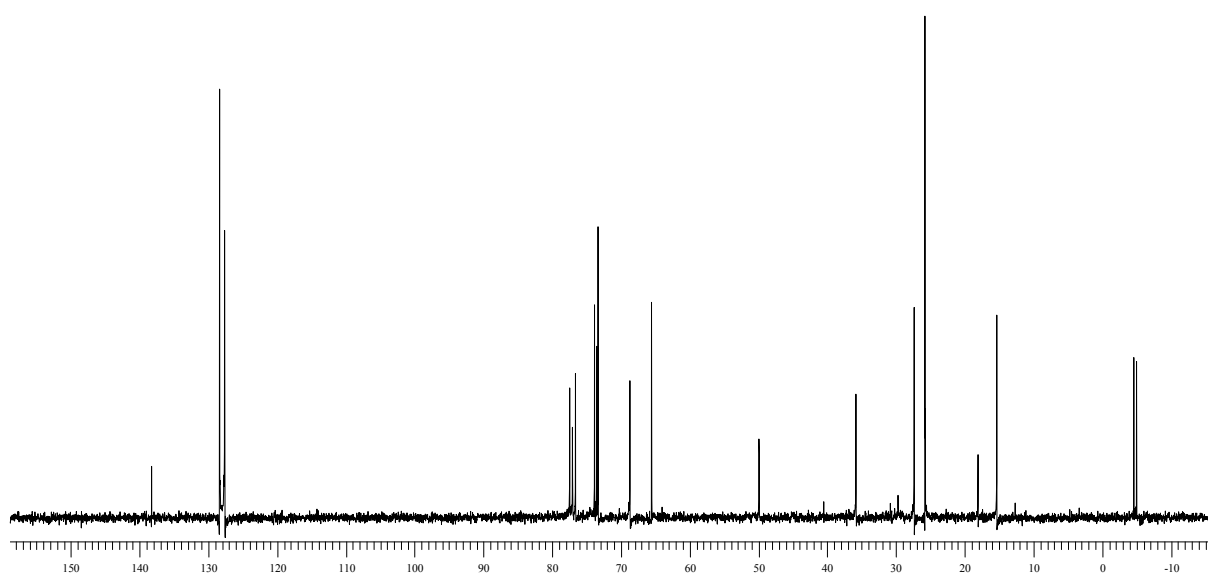

**<sup>1</sup>H NMR spectra of, 9 (300 MHz)**

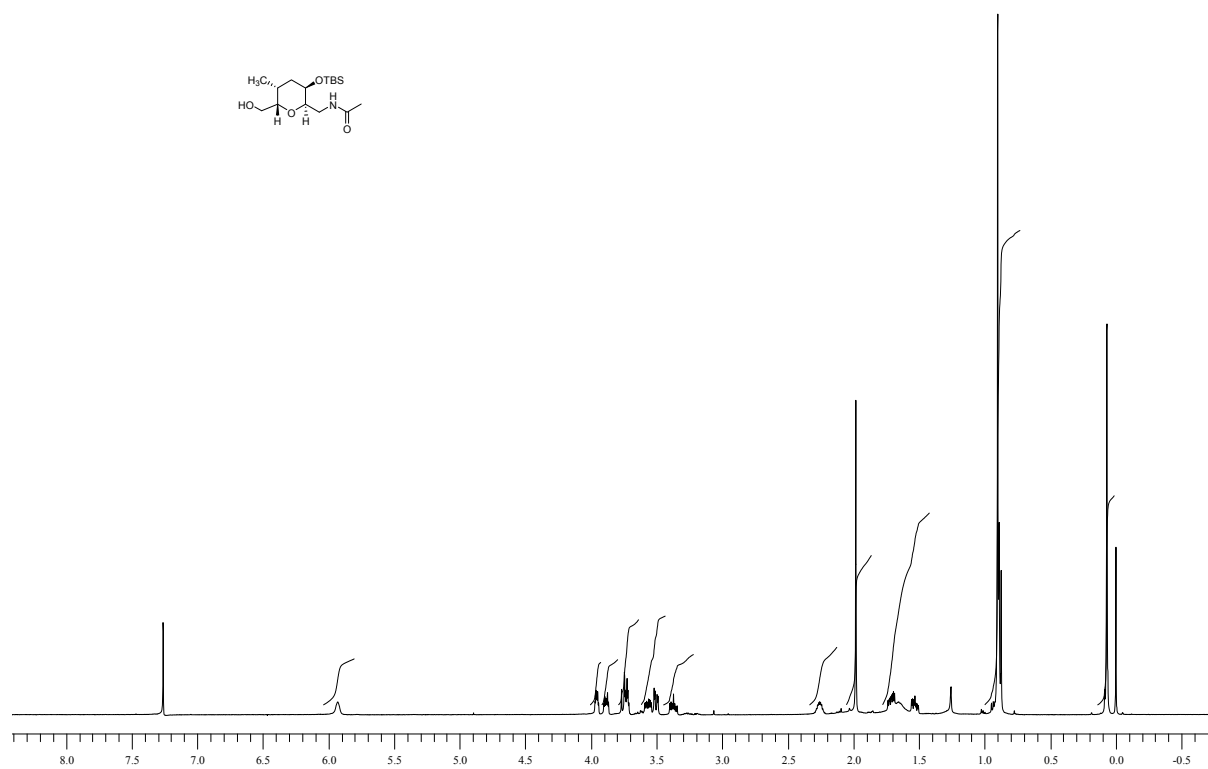

**<sup>13</sup>C NMR of compound, 9 (75 MHz)**

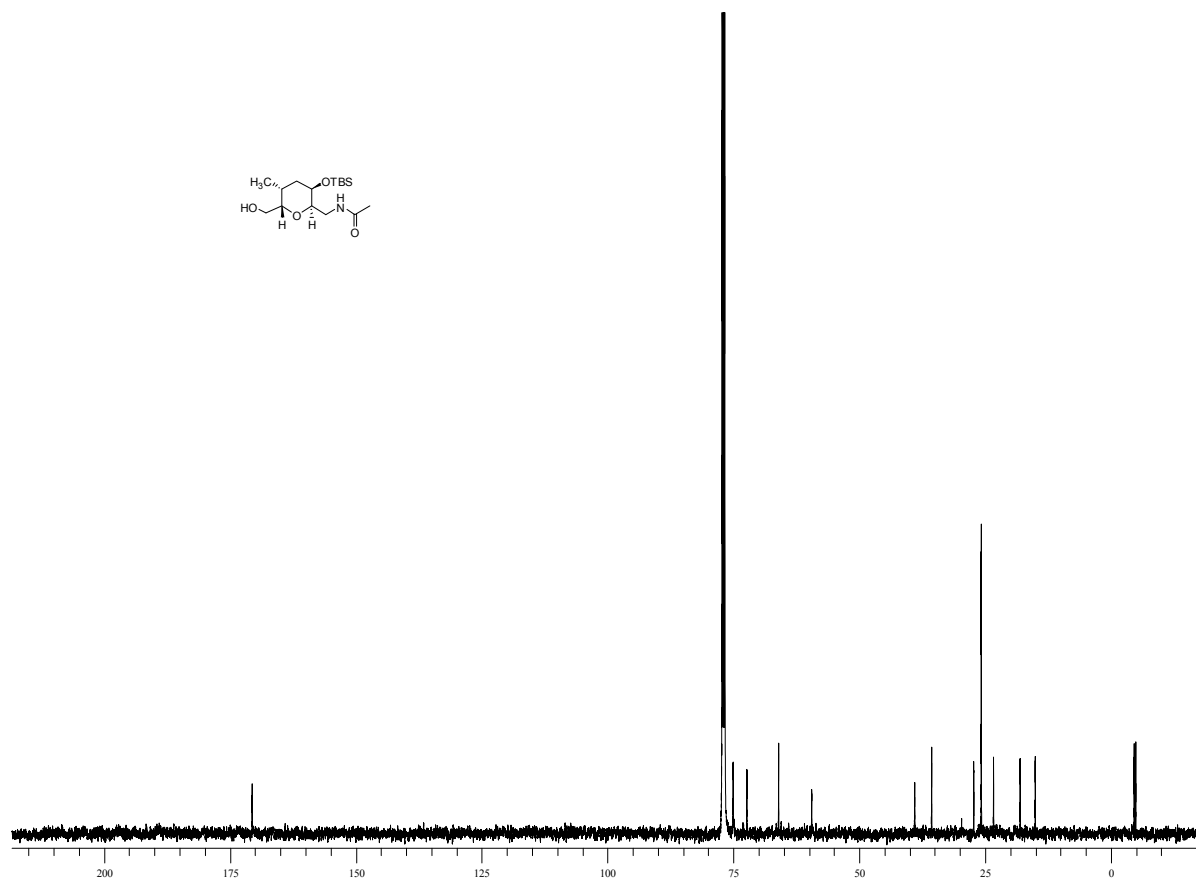

**<sup>1</sup>H NMR spectra of, 5a (300 MHz)**

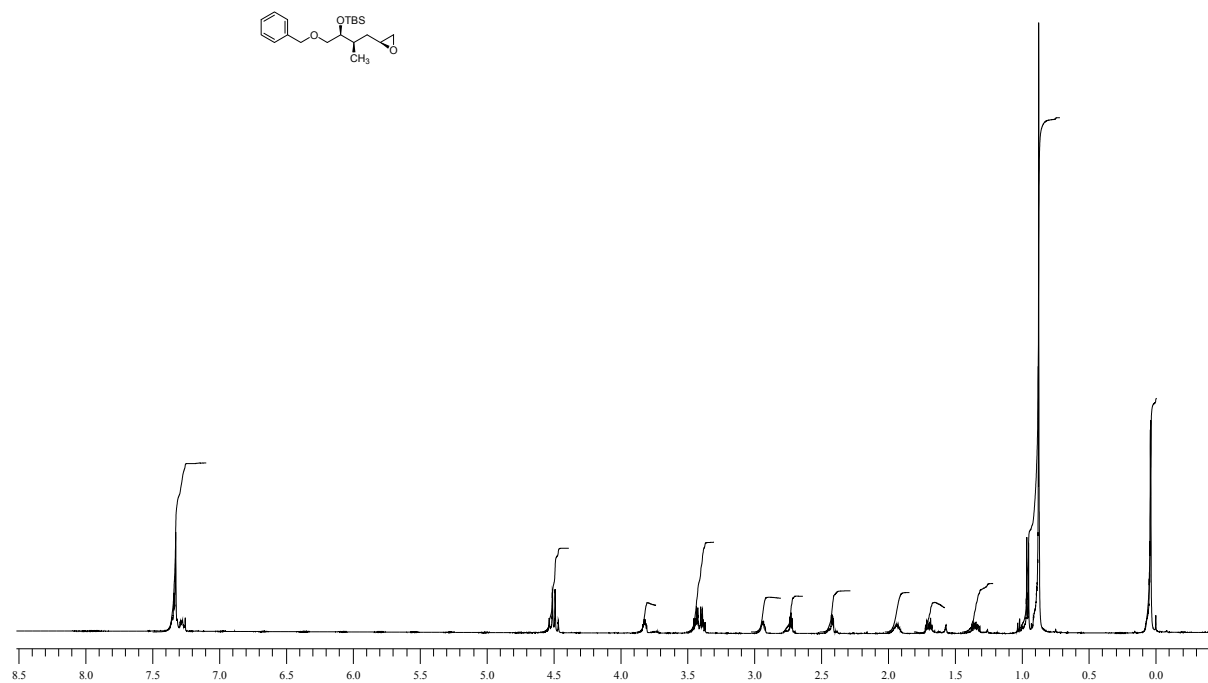

**<sup>13</sup>C NMR of compound, 5a (75 MHz)**

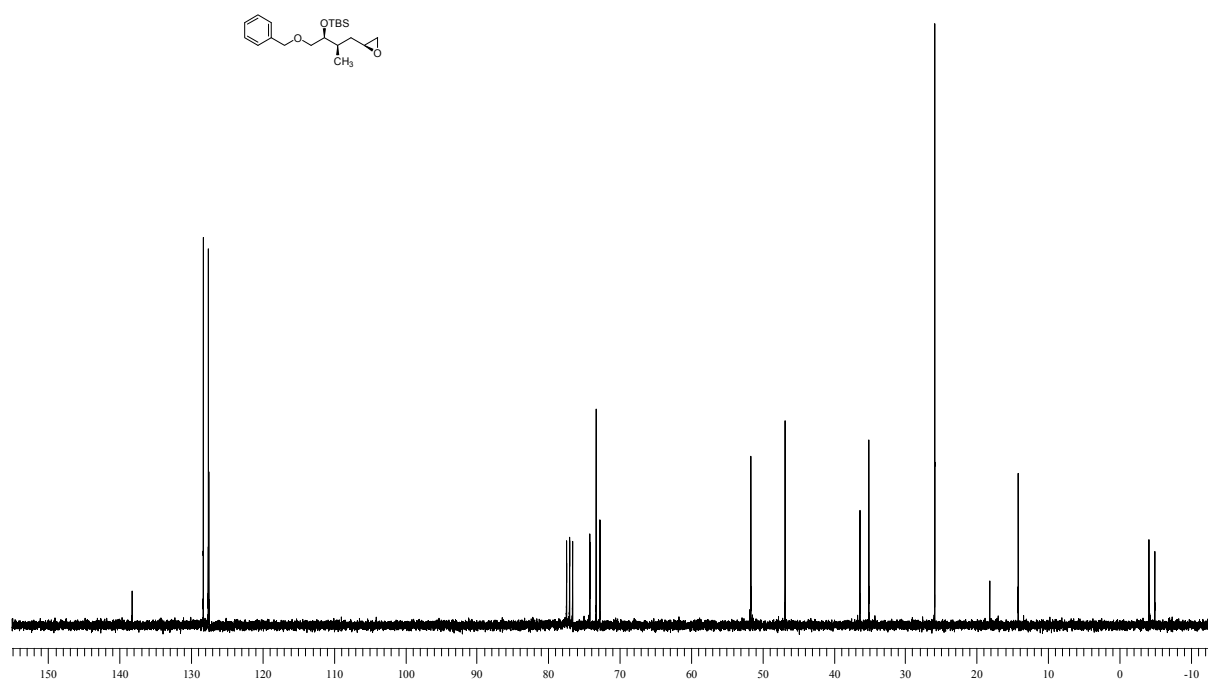

### $^1\text{H}$ NMR spectra (300 MHz)

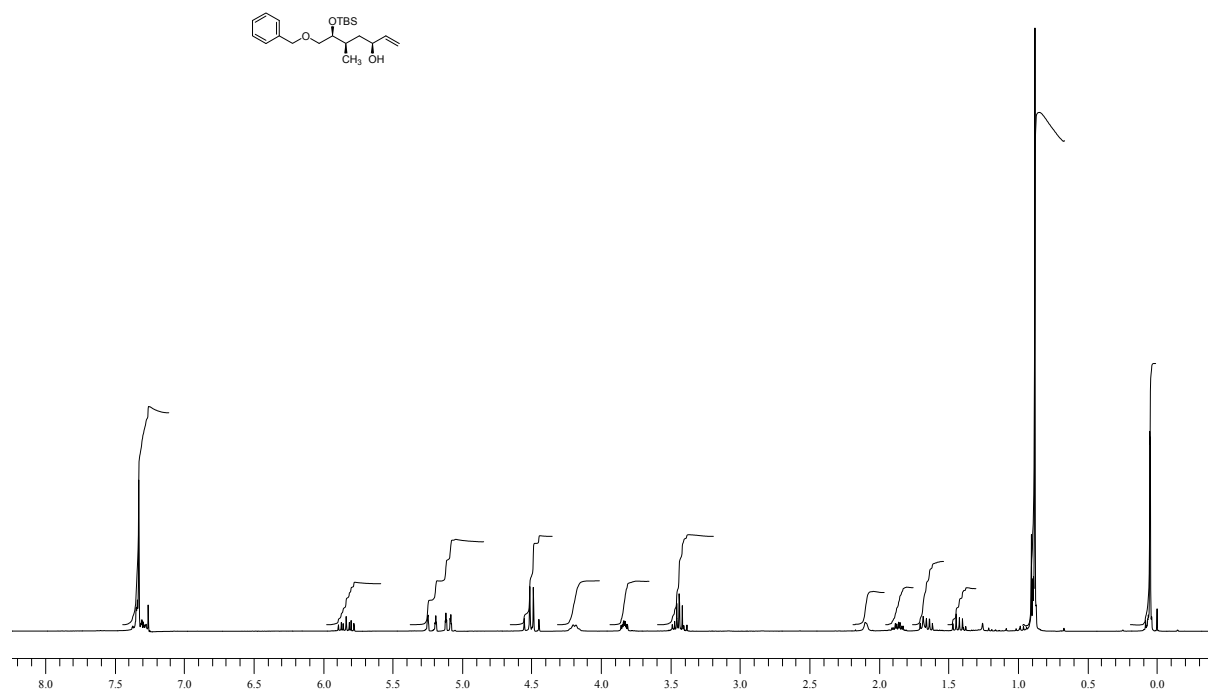

### $^{13}\text{C}$ NMR of compound (75 MHz)

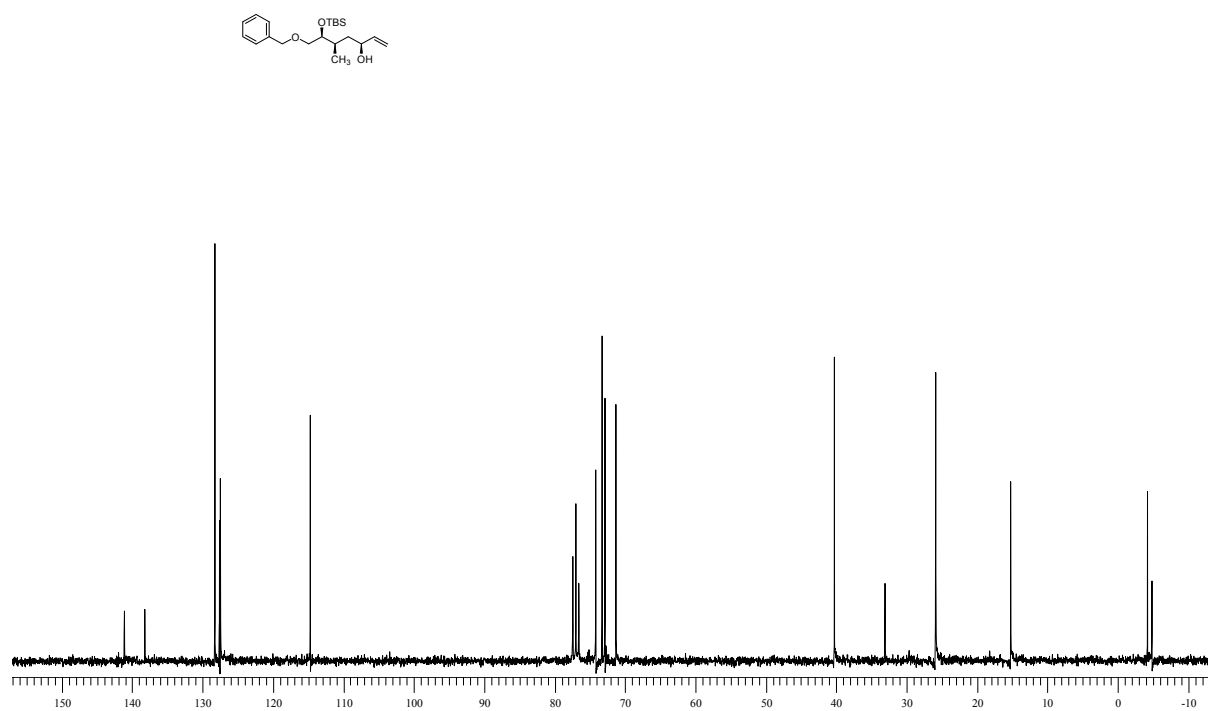

**<sup>1</sup>H NMR spectra of, 6a (300 MHz)**

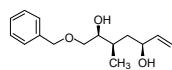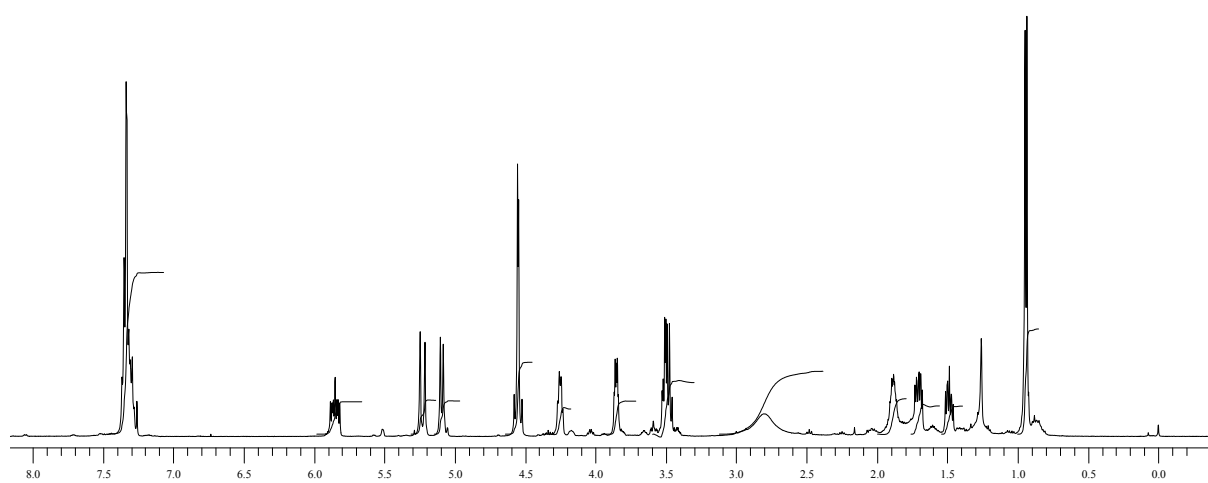

**<sup>13</sup>C NMR of compound, 6a (75 MHz)**

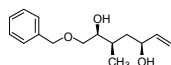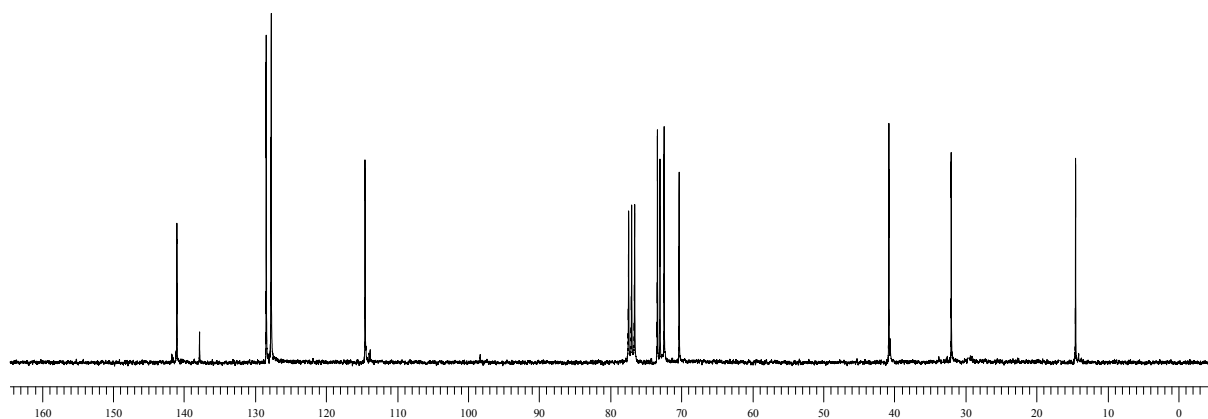

### $^1\text{H}$ NMR spectra of, 10 (300 MHz)

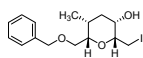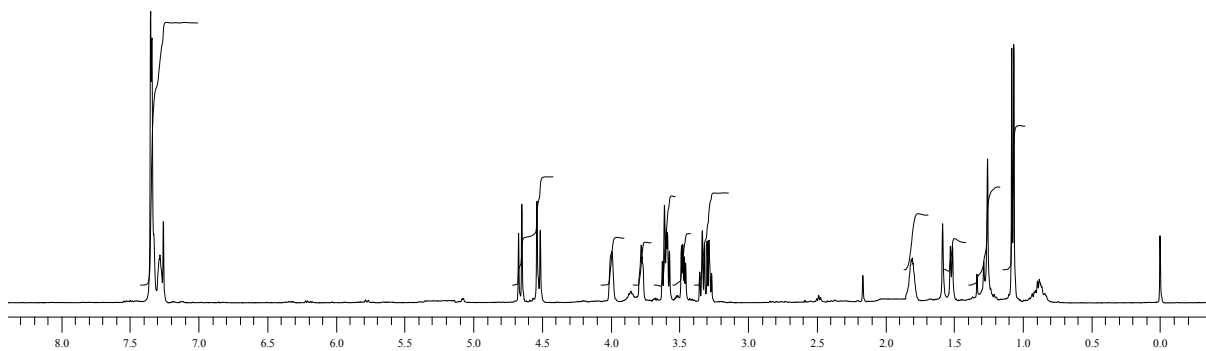

### $^{13}\text{C}$ NMR of compound, 10 (75 MHz)

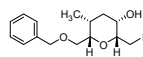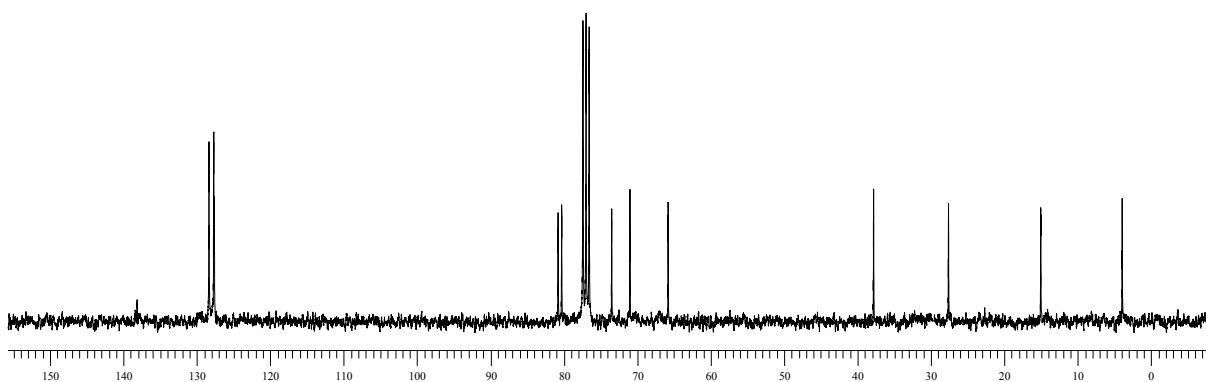

### $^1\text{H}$ NMR spectra (300 MHz)

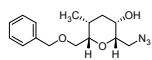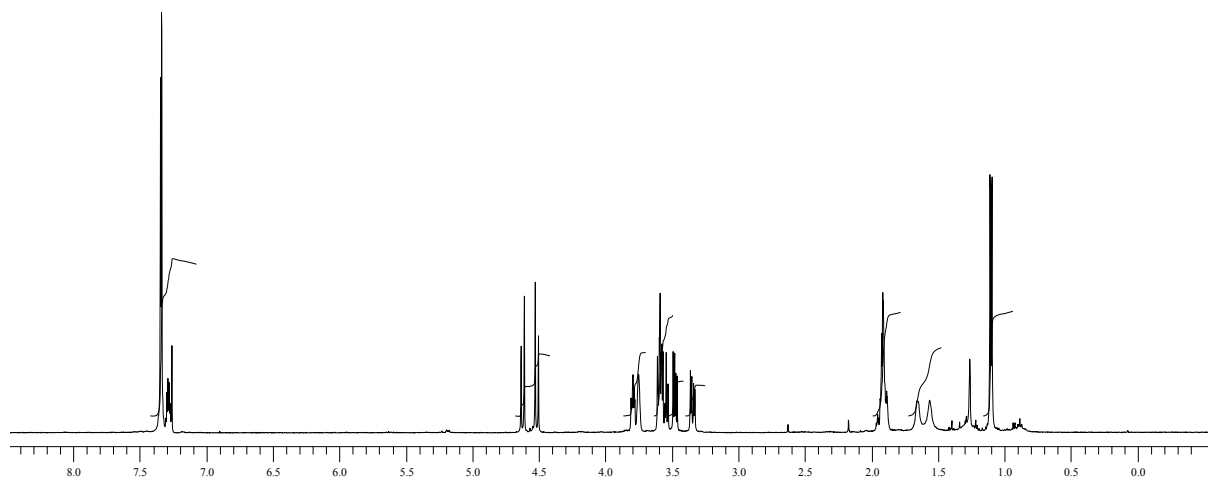

### $^{13}\text{C}$ NMR (75 MHz)

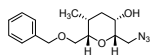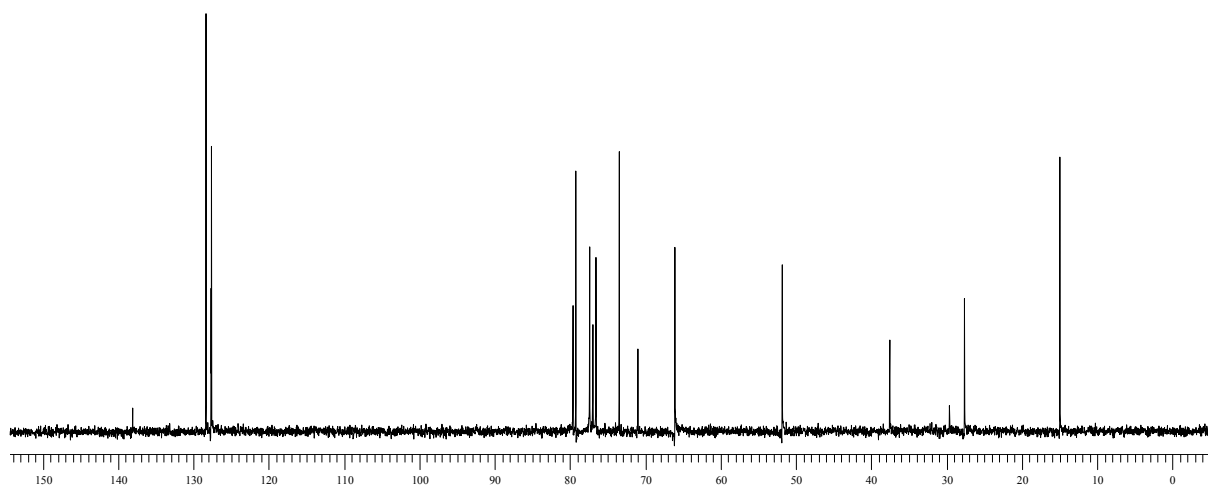



### $^1\text{H}$ NMR spectra (300 MHz)

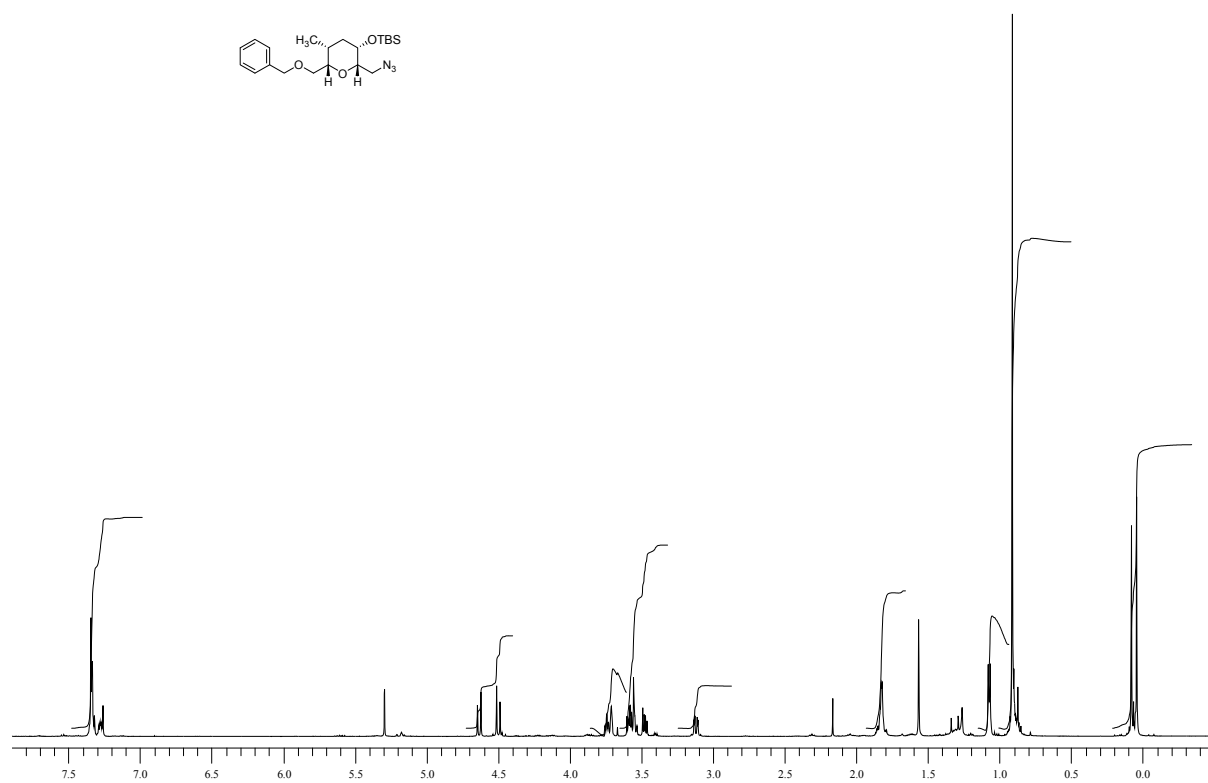

### $^{13}\text{C}$ NMR (75 MHz)

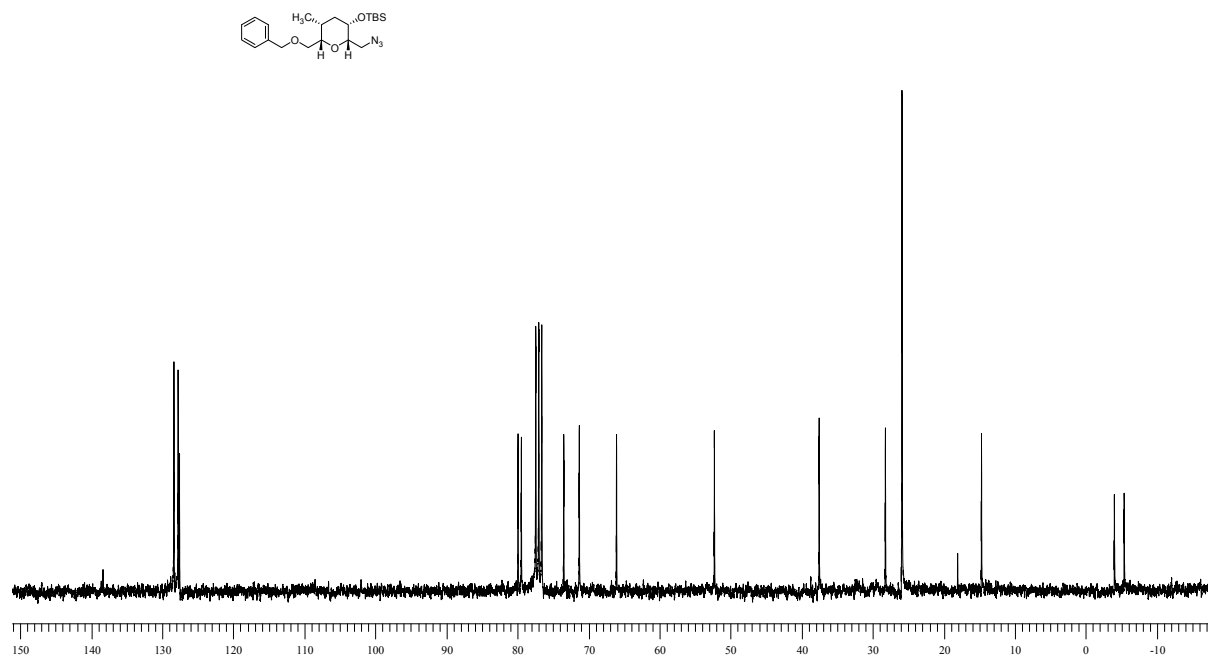

**$^1\text{H}$  NMR spectra of, 11 (300 MHz)**

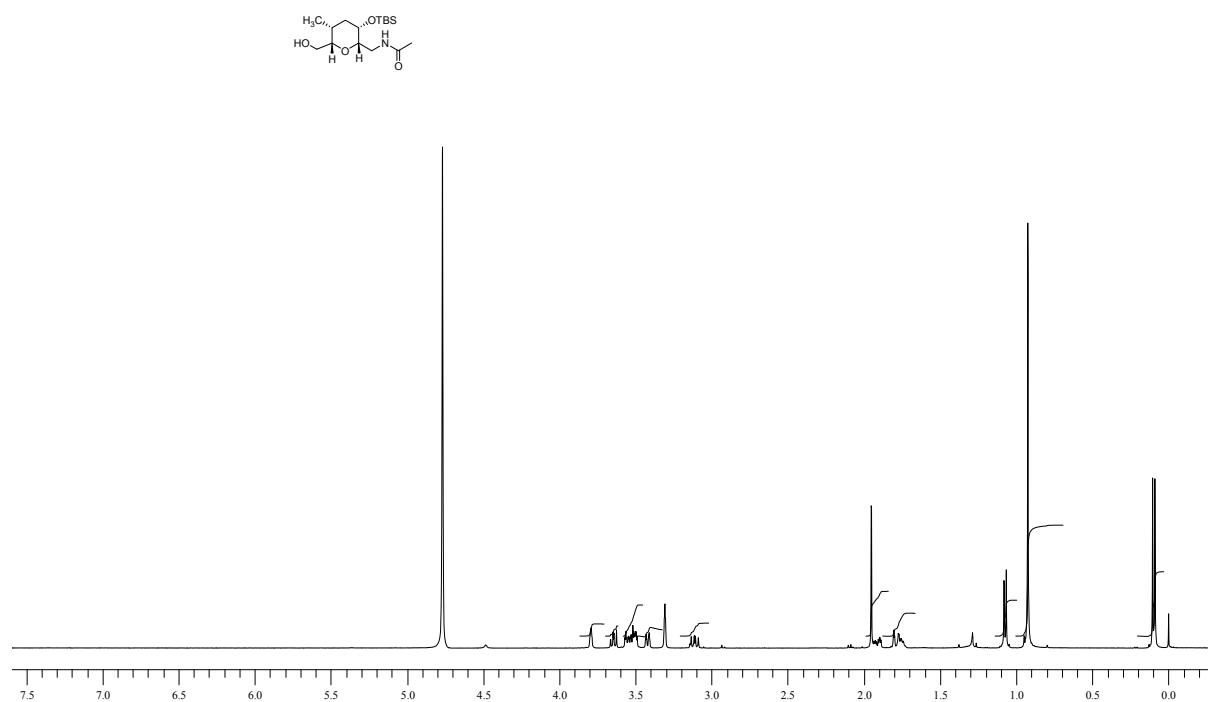

**$^{13}\text{C}$  NMR of compound, 11 (75 MHz)**

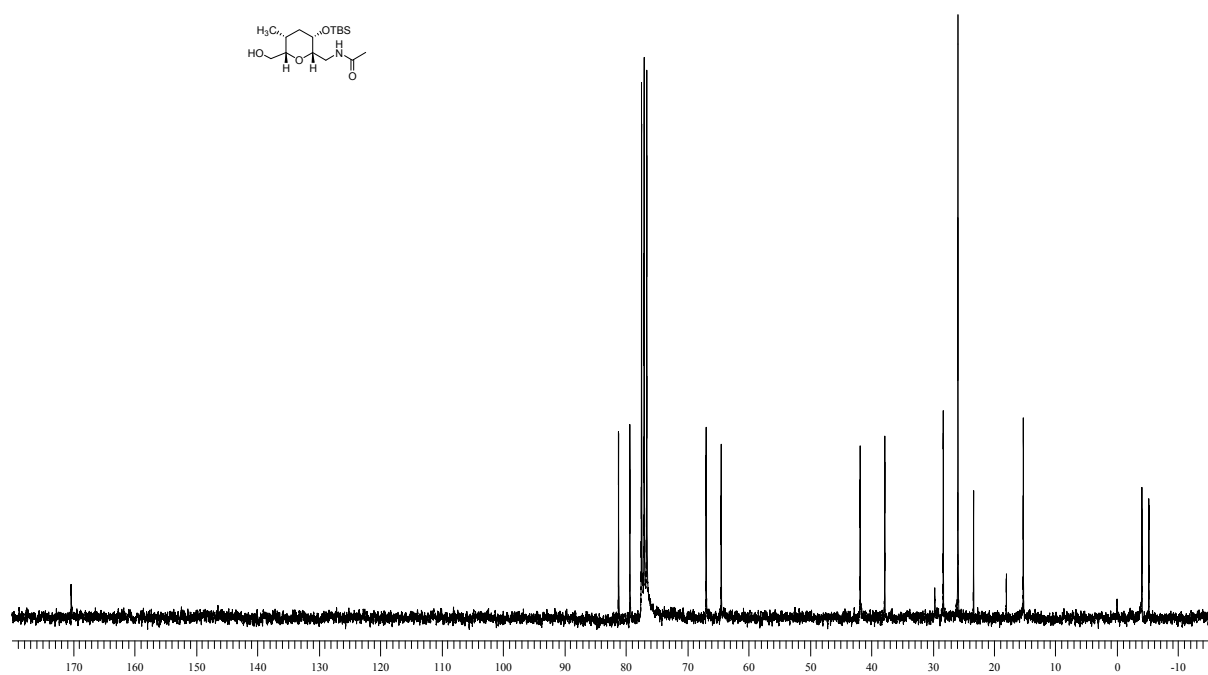

### <sup>1</sup>H NMR spectra (300 MHz)

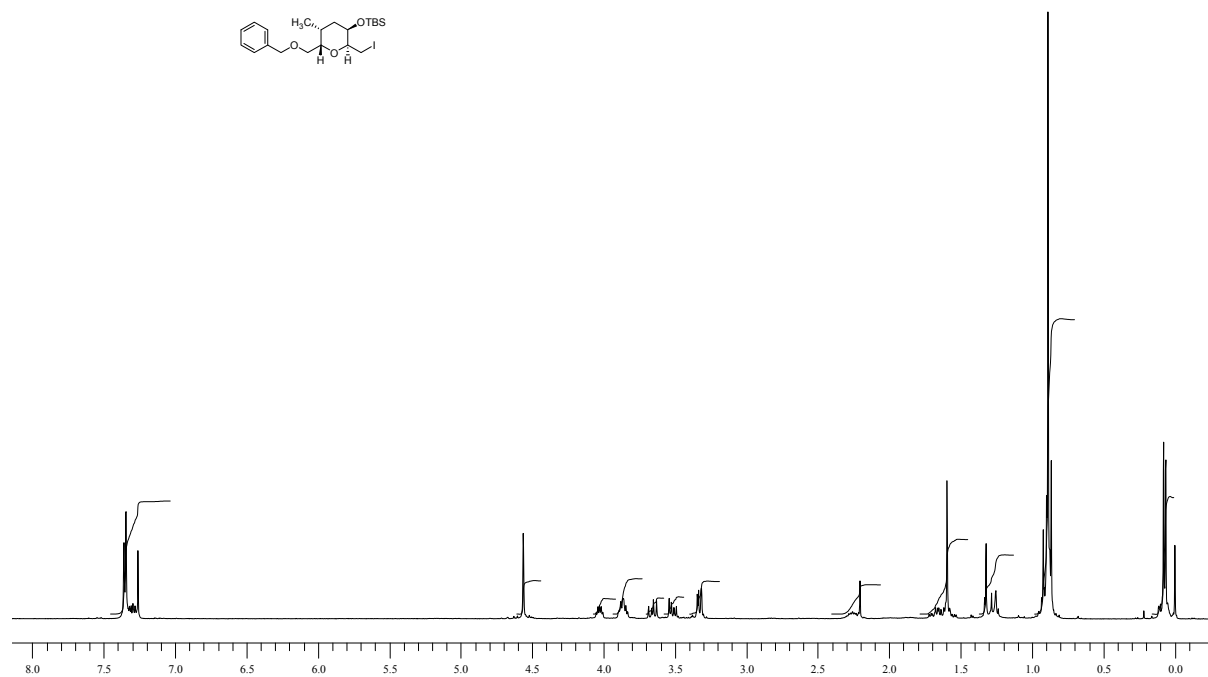

### <sup>13</sup>C NMR (75 MHz)

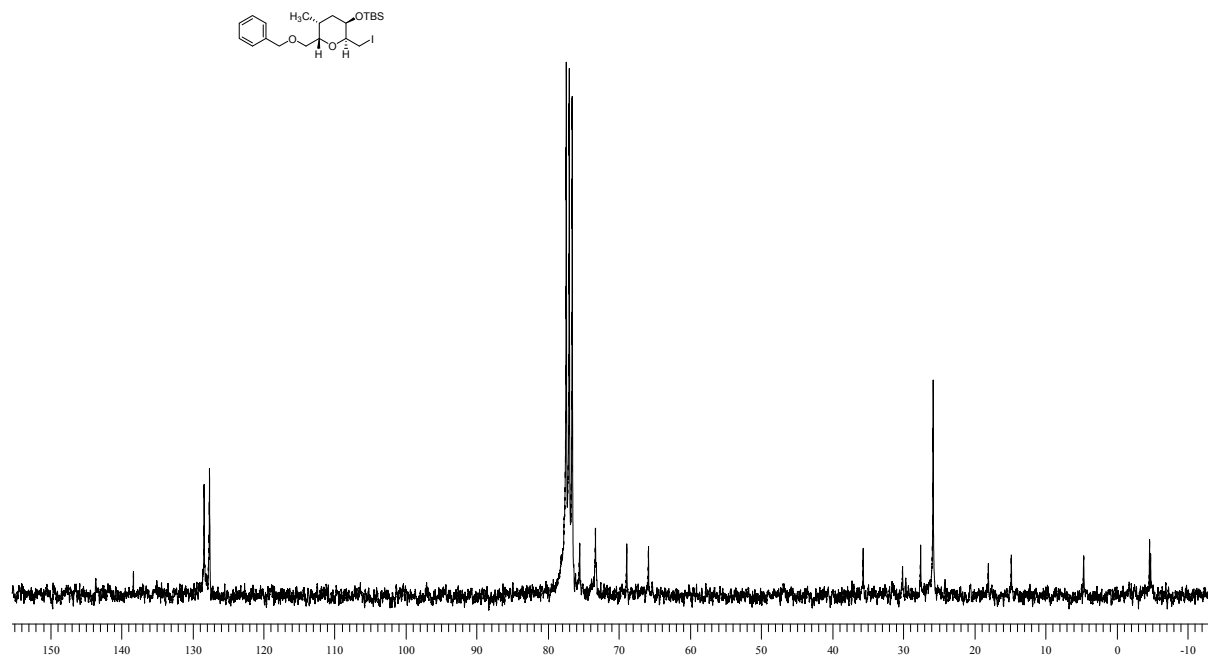

### $^1\text{H}$ NMR spectra of, 12 (300 MHz)

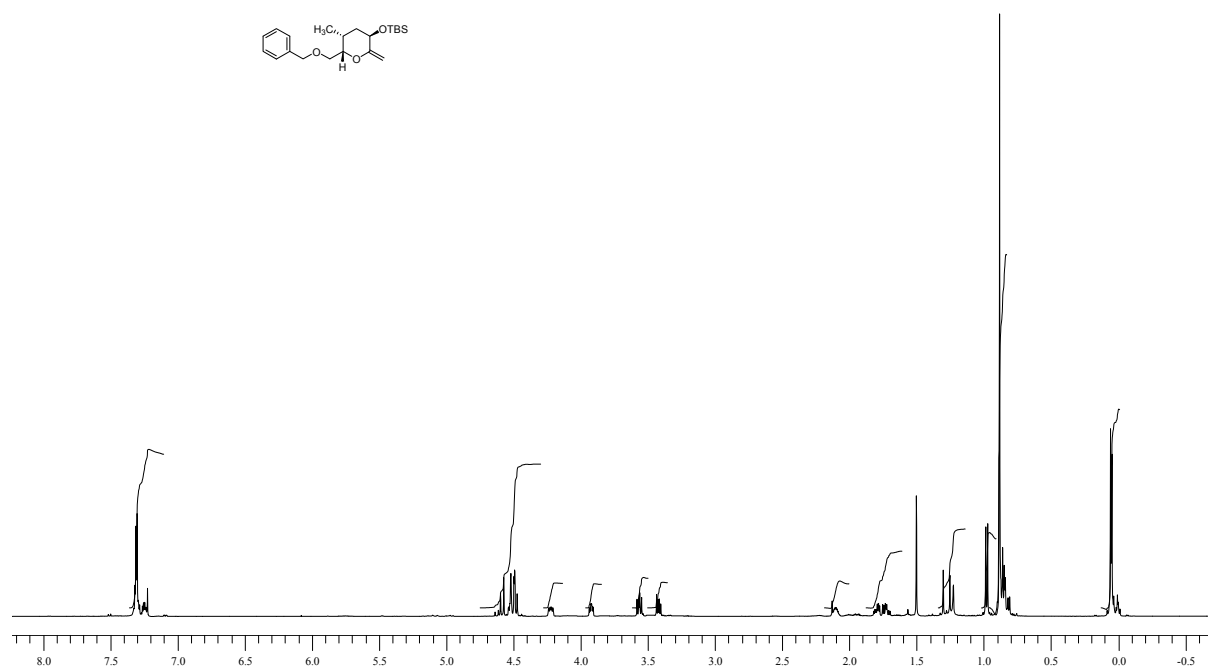

### $^{13}\text{C}$ NMR of compound, 12 (75 MHz)

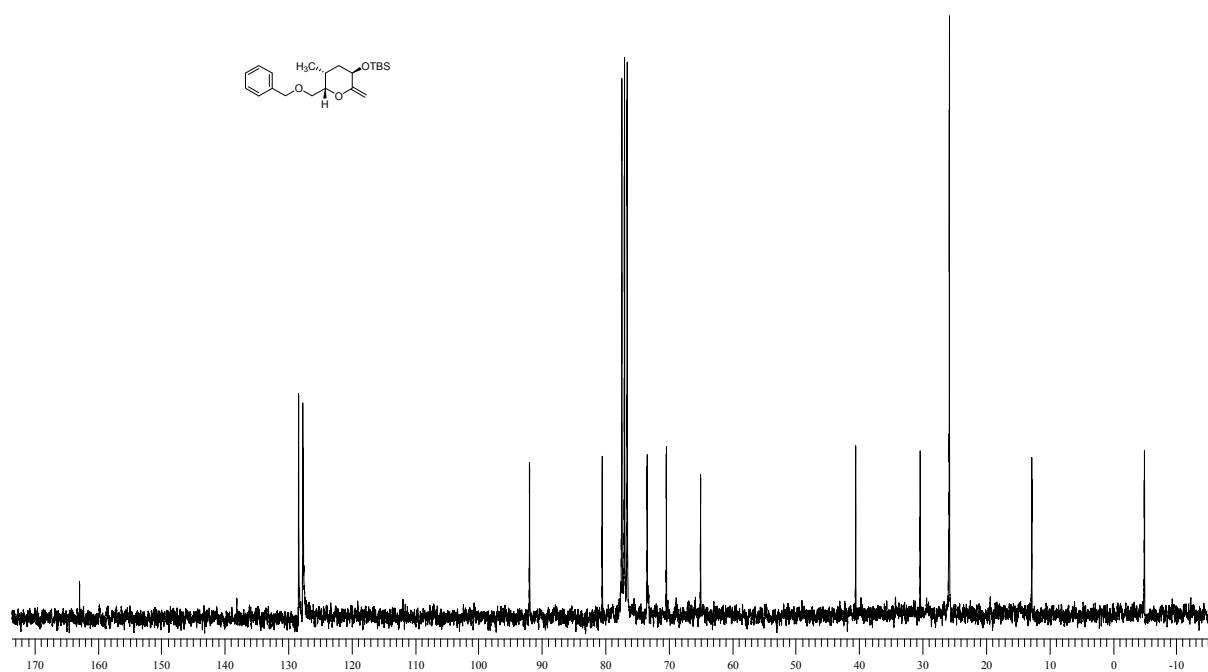

**<sup>1</sup>H NMR spectra of, 13 (300 MHz)**

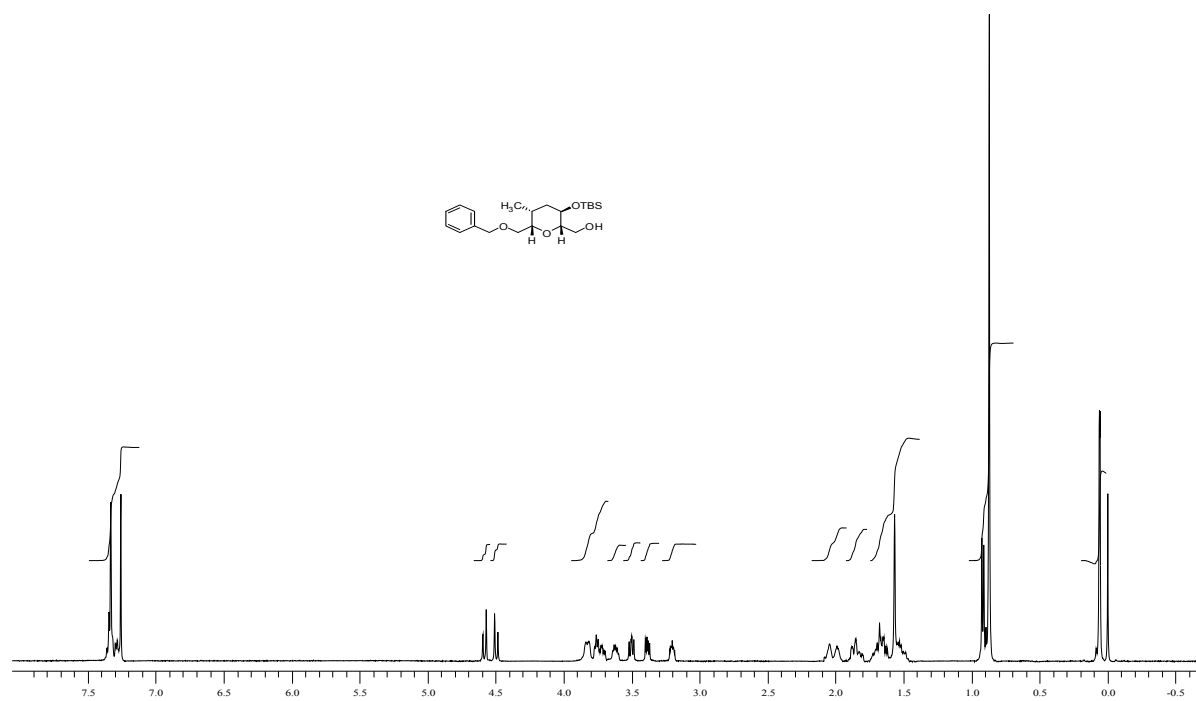

**<sup>13</sup>C NMR of compound, 13 (75 MHz)**

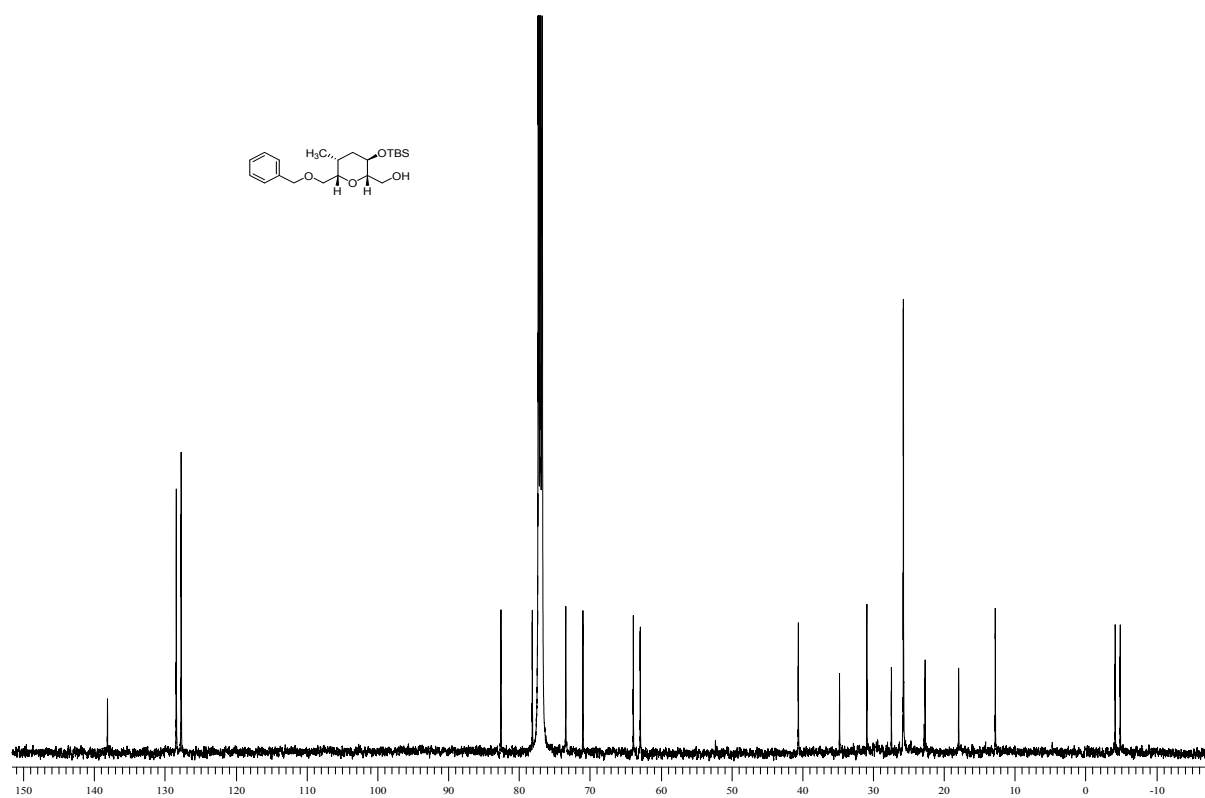

### $^1\text{H}$ NMR spectra of, 14 (300 MHz)

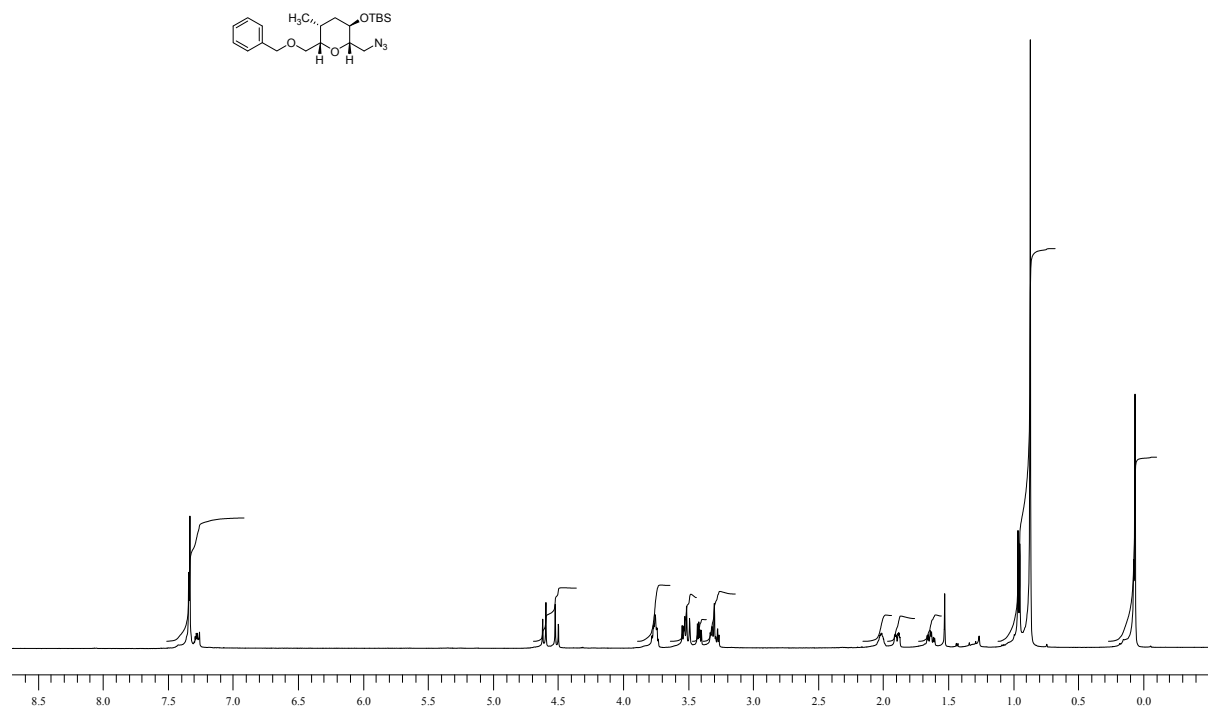

### $^{13}\text{C}$ NMR of compound, 14 (75 MHz)

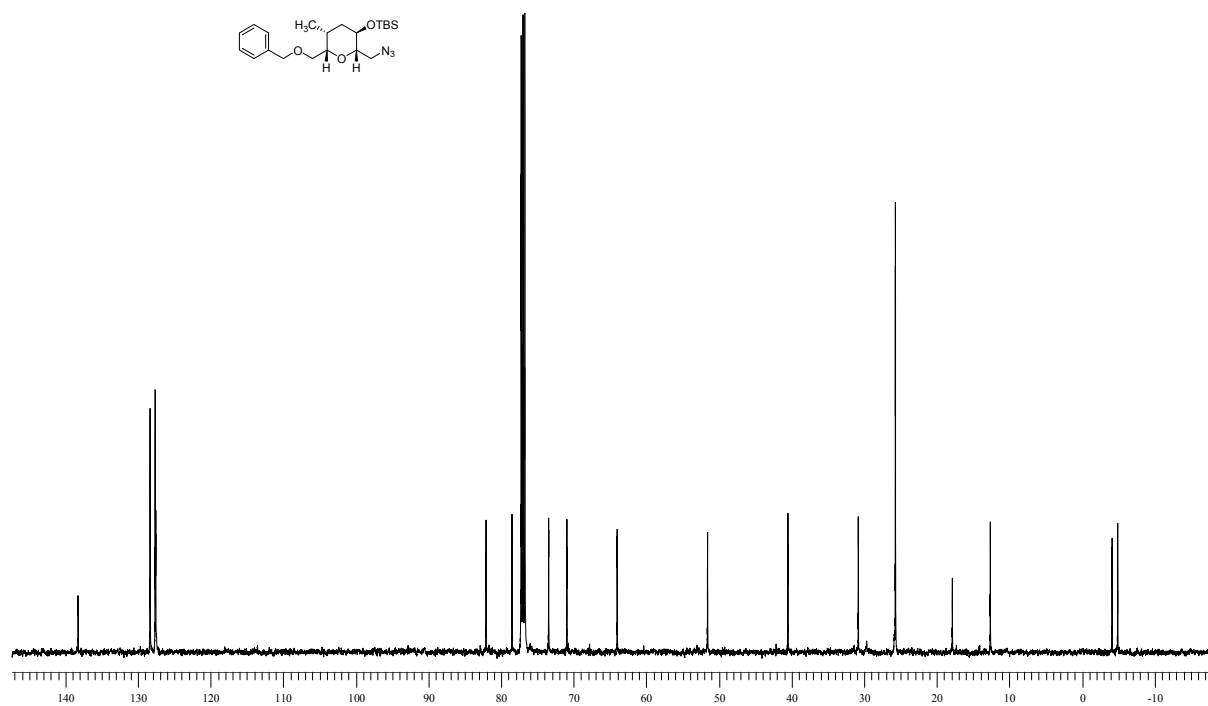

**<sup>1</sup>H NMR spectra of, 15 (300 MHz)**

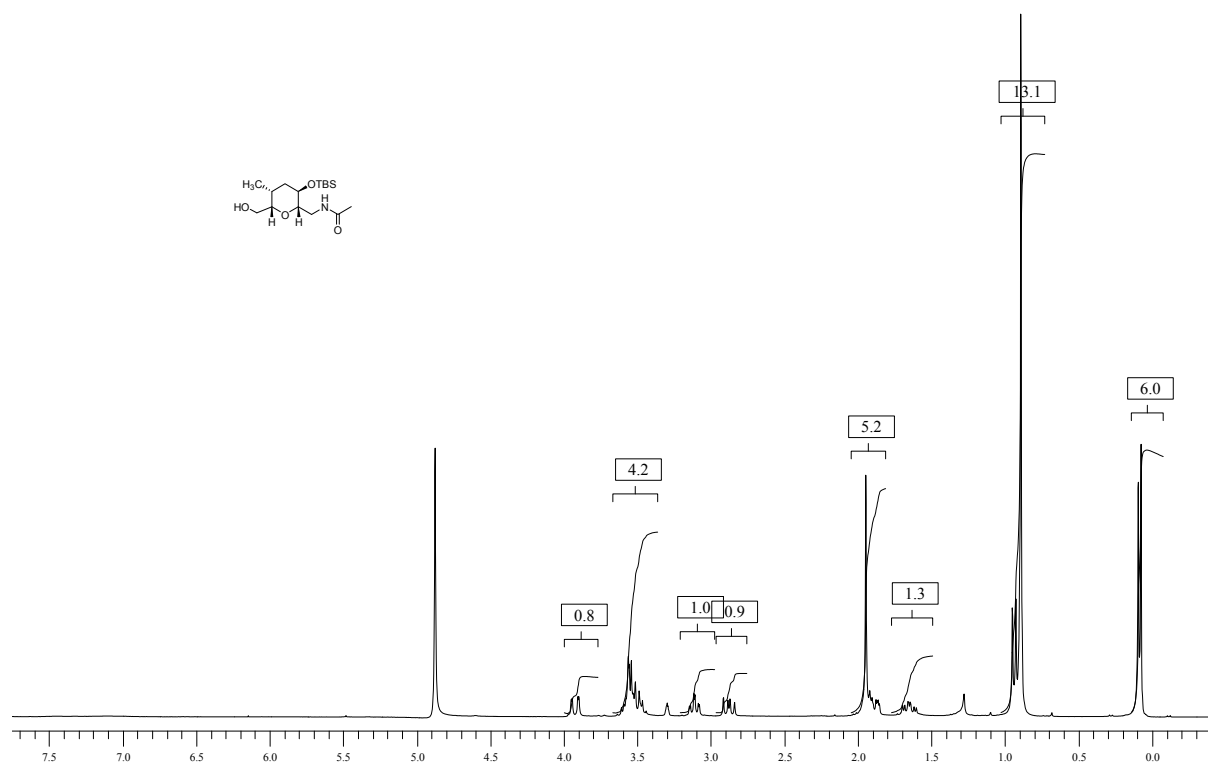

**<sup>13</sup>C NMR of compound, 15 (75 MHz)**

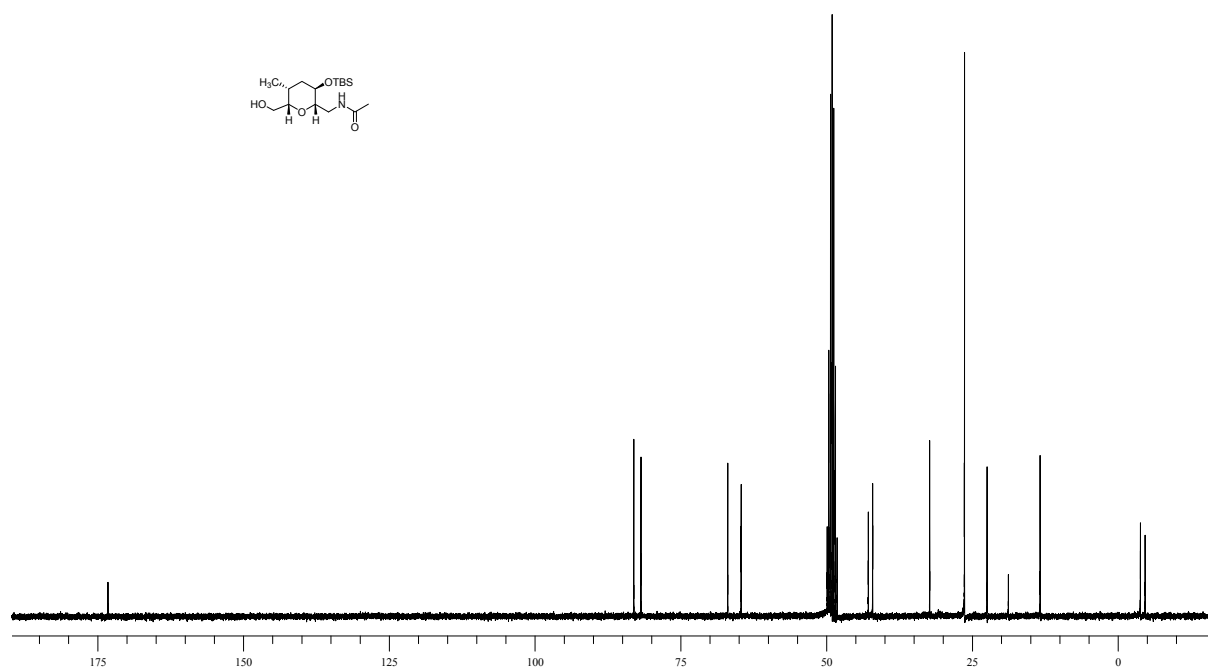

## HPLC data:

### HPLC of 3b, racemic:

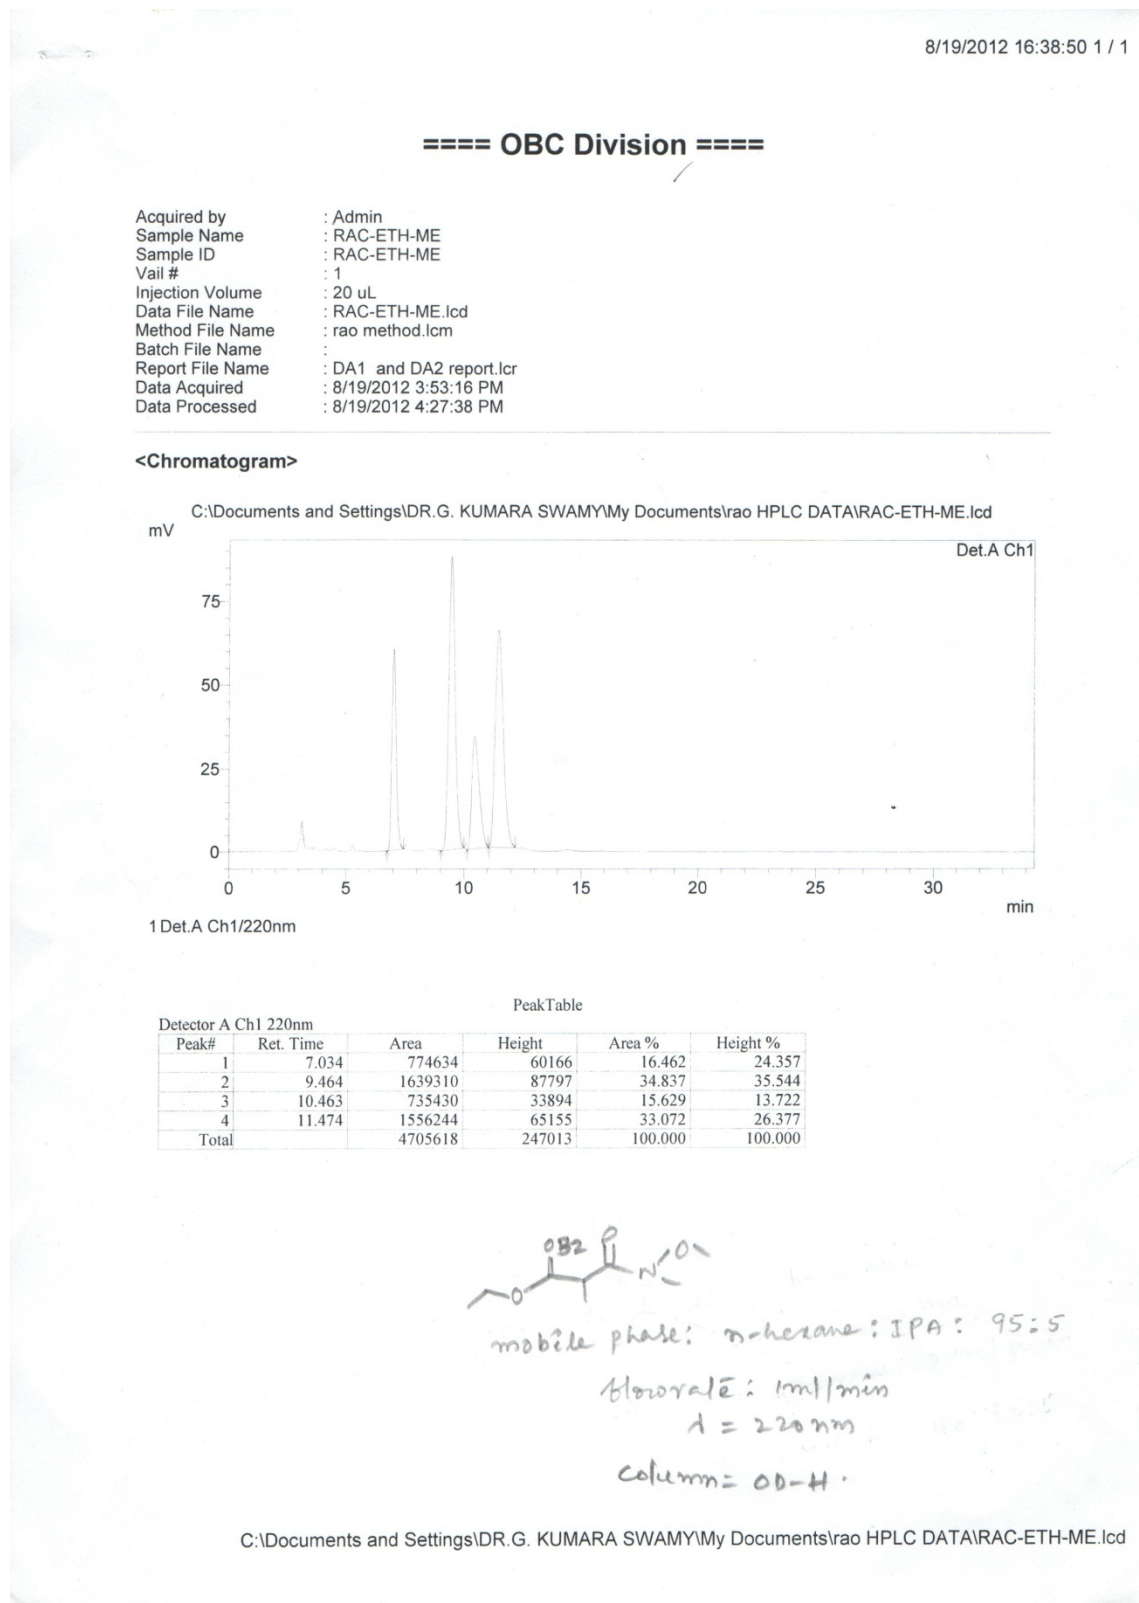



## HPLC of 3b, chiral:

8/19/2012 18:51:50 1 / 1

### ==== OBC Division ====

Acquired by : Admin  
Sample Name : CHI-ETH-ME  
Sample ID : CHI-ETH-ME  
Vial # : 1  
Injection Volume : 20 uL  
Data File Name : CHI-ETH-ME.lcd  
Method File Name : rao method.lcm  
Batch File Name :  
Report File Name : DA1 and DA2 report.lcr  
Data Acquired : 8/19/2012 6:25:51 PM  
Data Processed : 8/19/2012 6:47:02 PM

#### <Chromatogram>

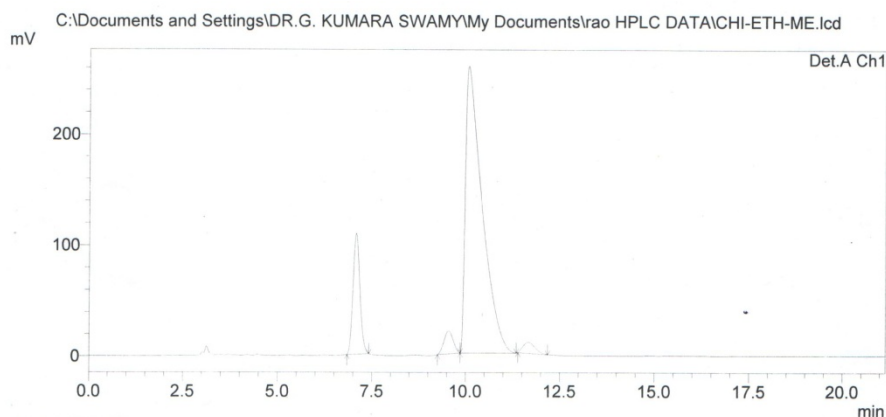

PeakTable

| Peak# | Ret. Time | Area    | Height | Area %  | Height % |
|-------|-----------|---------|--------|---------|----------|
| 1     | 7.075     | 1388340 | 108777 | 13.932  | 27.351   |
| 2     | 9.546     | 349919  | 20602  | 3.512   | 5.180    |
| 3     | 10.063    | 8012768 | 258605 | 80.410  | 65.024   |
| 4     | 11.668    | 213847  | 9721   | 2.146   | 2.444    |
| Total |           | 9964874 | 397705 | 100.000 | 100.000  |

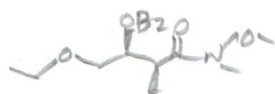

mobile phase: n-hexane: IPA: 95:5

flow rate: 1ml/min

$\lambda = 220\text{nm}$

column = OD-H

C:\Documents and Settings\DR.G. KUMARA SWAMY\My Documents\rao HPLC DATA\CHI-ETH-ME.lcd

### HPLC of 3c, racemic:

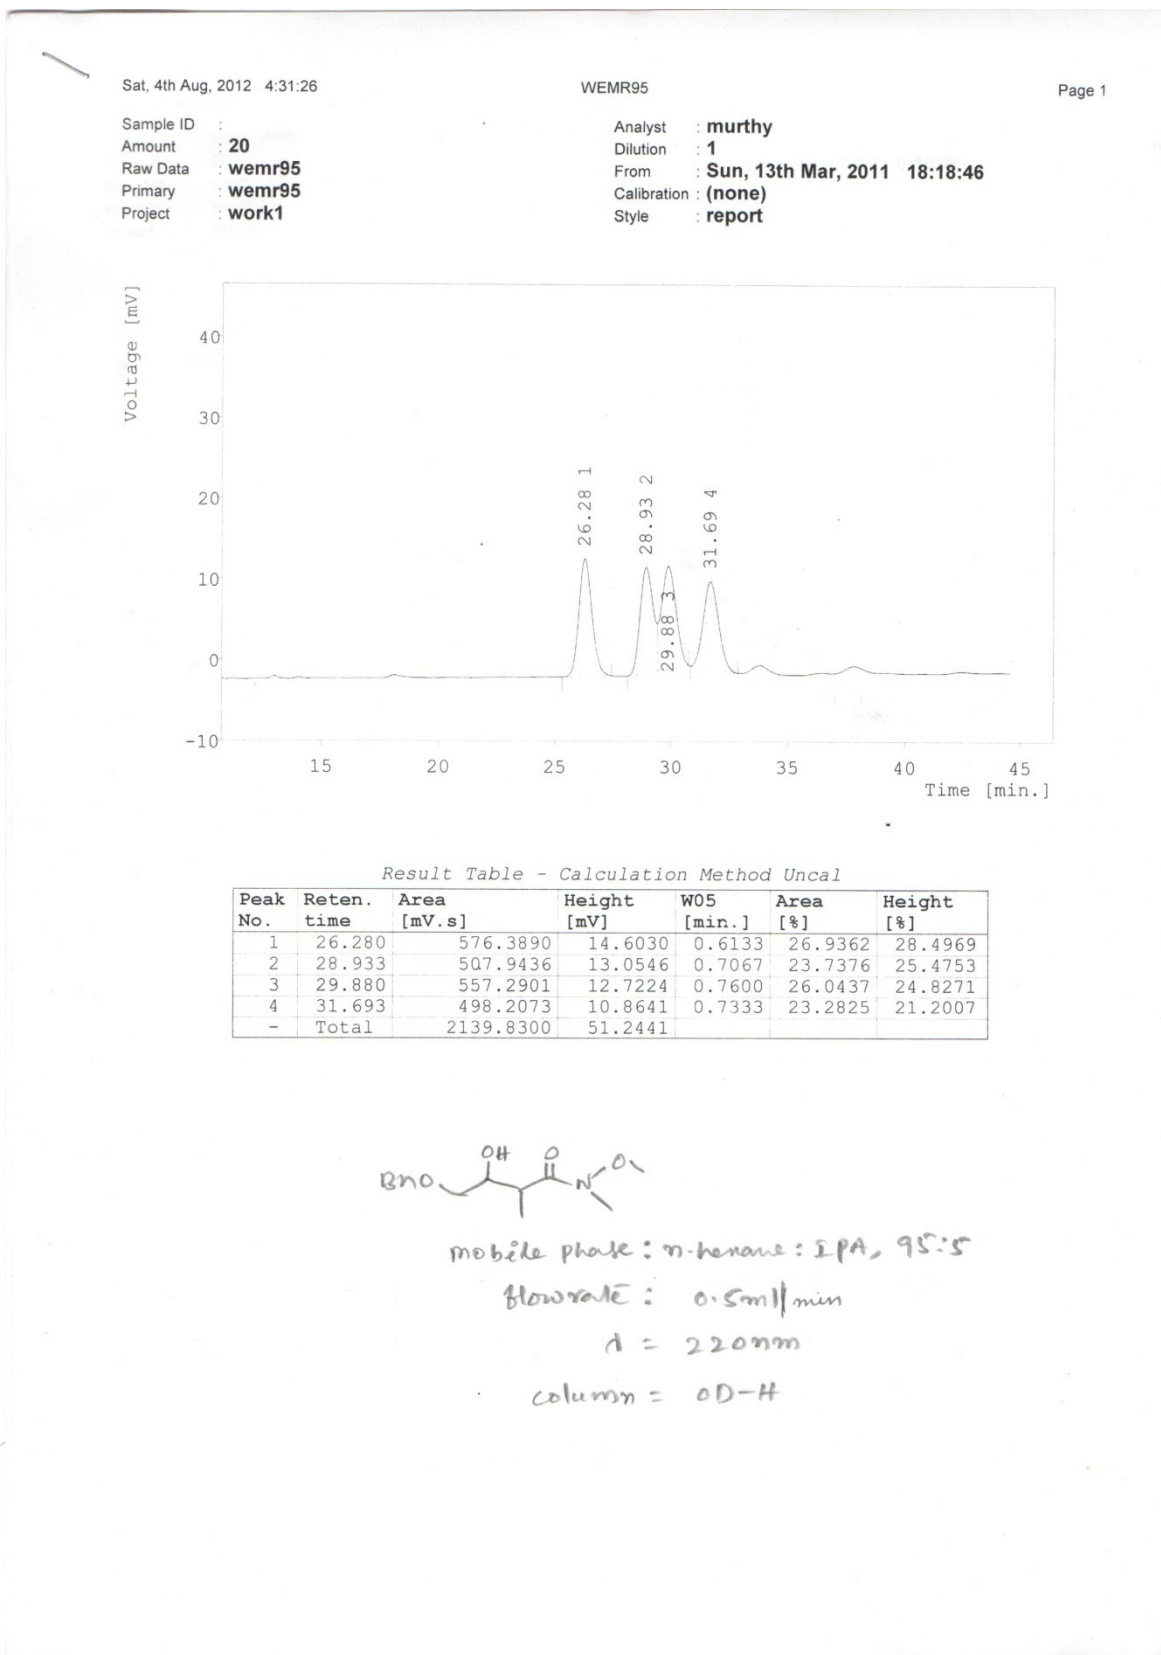

### HPLC of 3c, chiral:

Sun, 14th Oct. 2012 12:44:48

WEMC95

Page 1

Sample ID : **wemch95**  
Amount : **20**  
Raw Data : **wemc95**  
Primary : **wemc95**  
Project : **work1**

Analyst : **murthy**  
Dilution : **1**  
From : **Mon, 14th Mar, 2011 0:10:24**  
Calibration : **(none)**  
Style : **report**

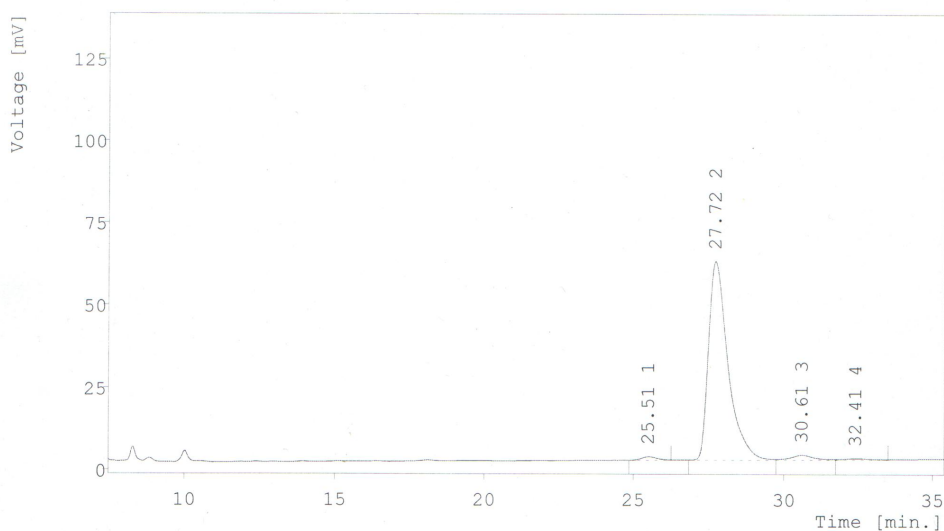

Result Table - Calculation Method Uncal

| Peak No. | Reten. time | Area [mV.s] | Height [mV] | W05 [min.] | Area [%] | Height [%] |
|----------|-------------|-------------|-------------|------------|----------|------------|
| 1        | 25.507      | 36.1390     | 1.0606      | 0.5600     | 1.2711   | 1.6769     |
| 2        | 27.720      | 2717.3407   | 60.4085     | 0.6667     | 95.5727  | 95.5093    |
| 3        | 30.613      | 73.2524     | 1.4512      | 0.7333     | 2.5764   | 2.2945     |
| 4        | 32.413      | 16.4875     | 0.3285      | 0.8000     | 0.5798   | 0.5193     |
| -        | Total       | 2843.2196   | 63.2488     |            |          |            |

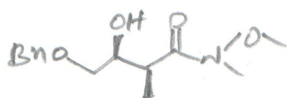

mobile phase : n-hexane : IPA, 95:5

flowrate : 0.5 ml/min

$\lambda$  = 220 nm

column = OD-H

### HPLC of 3d, racemic:

Sun, 14th Oct, 2012 12:14:14

RAETAS

Page 1

Sample ID : **worstet**  
Sample : **worstet**  
Amount : **20**  
Raw Data : **raetas**  
Primary : **raetas**  
Project : **work1**

Analyst : **murthy**  
Dilution : **1**  
From : **Fri, 3rd Aug, 2012 15:16:34**  
Calibration : **(none)**  
Style : **report**

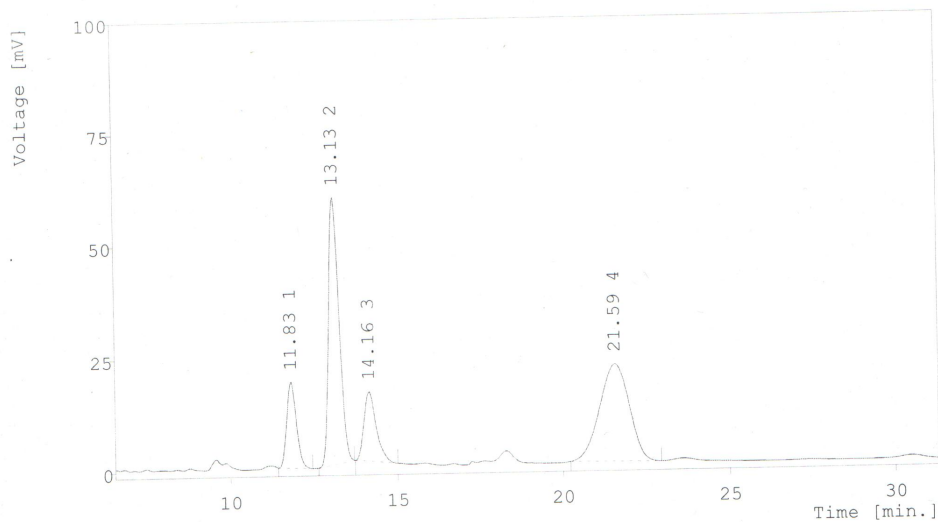

Result Table - Calculation Method Uncal

| Peak No. | Reten. time | Area [mV.s] | Height [mV] | W05 [min.] | Area [%] | Height [%] |
|----------|-------------|-------------|-------------|------------|----------|------------|
| 1        | 11.827      | 389.1180    | 19.0589     | 0.3200     | 11.3823  | 16.5318    |
| 2        | 13.133      | 1287.7686   | 59.2194     | 0.3467     | 37.6692  | 51.3672    |
| 3        | 14.160      | 401.0742    | 15.3832     | 0.4000     | 11.7320  | 13.3434    |
| 4        | 21.587      | 1340.6615   | 21.6250     | 1.0000     | 39.2165  | 18.7576    |
| -        | Total       | 3418.6223   | 115.2866    |            |          |            |

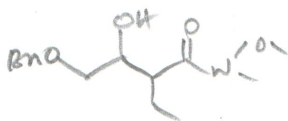

mobile phase: n-hexane : IPA, 95 : 5

flow rate: 1 ml/min

d = 220 mm

column = AS-H

### HPLC of 3d, chiral:

Sun, 14th Oct, 2012 12:21:19

CHETAS

Page 1

Sample ID : **raetas**  
Sample : **raetas**  
Amount : **20**  
Raw Data : **chetas**  
Primary : **chetas**  
Project : **work1**

Analyst : **murthy**  
Dilution : **1**  
From : **Fri, 3rd Aug, 2012 15:56:31**  
Calibration : **(none)**  
Style : **report**

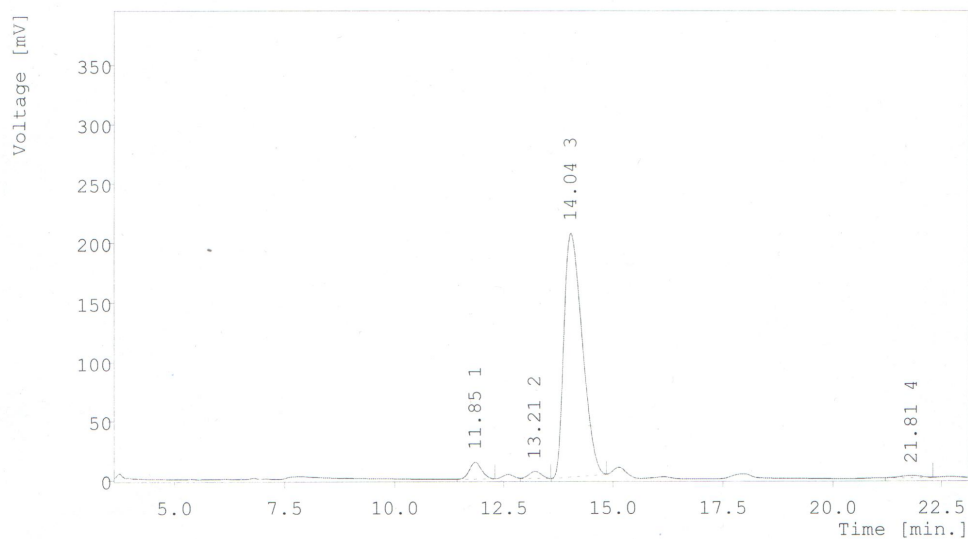

Result Table - Calculation Method Uncal

| Peak No. | Reten. time | Area [mV.s] | Height [mV] | W05 [min.] | Area [%] | Height [%] |
|----------|-------------|-------------|-------------|------------|----------|------------|
| 1        | 11.853      | 279.5454    | 14.1352     | 0.3200     | 4.3385   | 6.2189     |
| 2        | 13.213      | 113.5960    | 5.9111      | 0.3333     | 1.7630   | 2.6006     |
| 3        | 14.040      | 5998.9375   | 205.5901    | 0.4800     | 93.1022  | 90.4502    |
| 4        | 21.813      | 51.3076     | 1.6601      | 0.5067     | 0.7963   | 0.7303     |
| -        | Total       | 6443.3864   | 227.2965    |            |          |            |

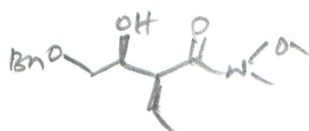

mobile phase: n-hexane: IPA, 95:5

flowrate: 1ml/min

d = 220nm

column = AS-H

### HPLC of 3e, racemic:

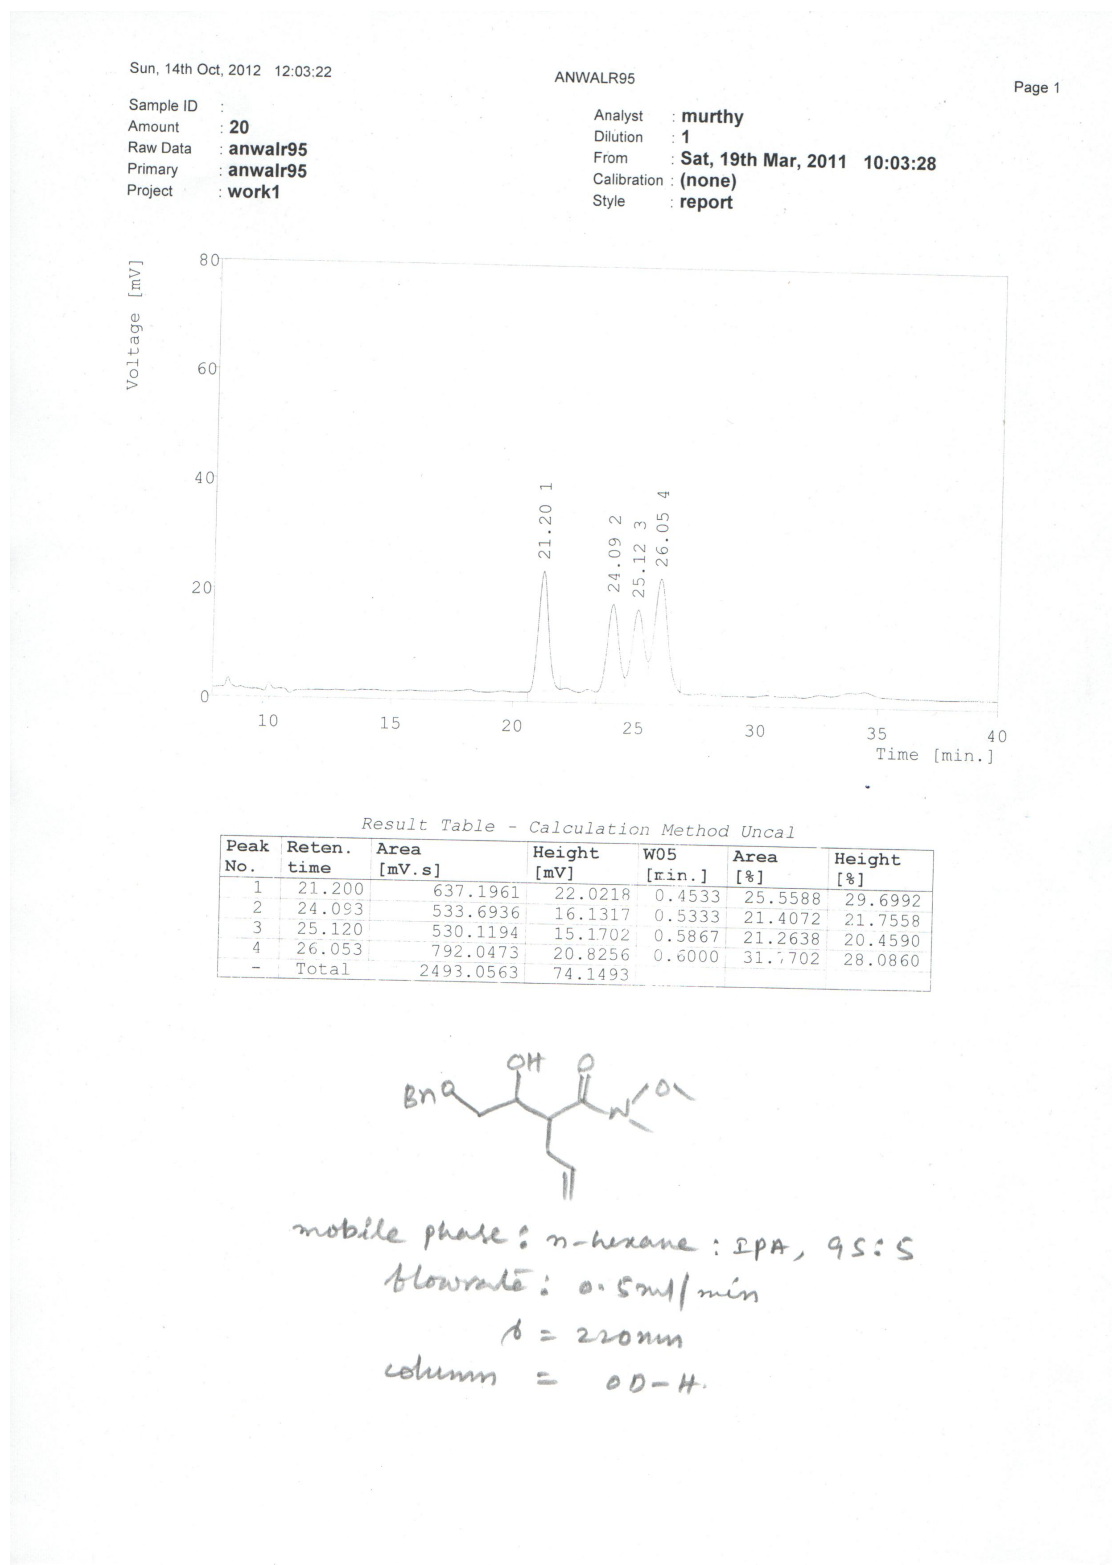

## HPLC of 3e, chiral:

Sun, 14th Oct, 2012 12:06:56

ANWALC95

Page 1

Sample ID : **anwalr95**  
Amount : **20**  
Raw Data : **anwalc95**  
Primary : **anwalc95**  
Project : **work1**

Analyst : **murthy**  
Dilution : **1**  
From : **Sat, 19th Mar, 2011 11:43:50**  
Calibration : **(none)**  
Style : **report**

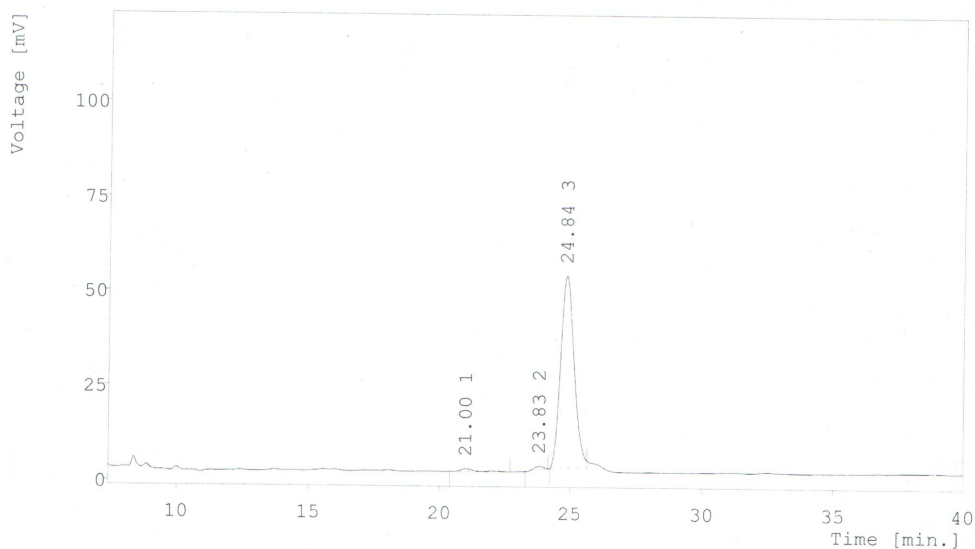

Result Table - Calculation Method Uncal

| Peak No. | Reten. time | Area [mV.s] | Height [mV] | W05 [min.] | Area [%] | Height [%] |
|----------|-------------|-------------|-------------|------------|----------|------------|
| 1        | 21.000      | 30.8516     | 0.7671      | 0.4933     | 1.6431   | 1.4576     |
| 2        | 23.827      | 24.5156     | 0.9825      | 0.4267     | 1.3056   | 1.8670     |
| 3        | 24.840      | 1822.3102   | 50.8755     | 0.5733     | 97.0513  | 96.6754    |
| -        | Total       | 1877.6774   | 52.6251     |            |          |            |

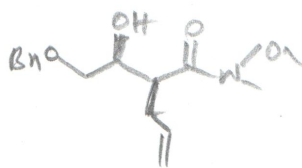

mobile phase : n-hexane : IPA, 95 : 5

flowrate : 0.5 ml/min,

d = 220 nm

column = OD-H.

### HPLC of 3f, racemic:

9/19/2012 11:21:15 1 / 1

#### ==== OBC Division ====

Acquired by : Admin  
Sample Name : RAC-BENZYL  
Sample ID : RAC-BENZYL  
Vial # : 1  
Injection Volume : 20 uL  
Data File Name : RAC-BENZYL.lcd  
Method File Name : purge.lcm  
Batch File Name :  
Report File Name : DA1 and DA2 report.lcr  
Data Acquired : 9/2/2012 4:09:54 PM  
Data Processed : 9/2/2012 4:47:01 PM

#### <Chromatogram>

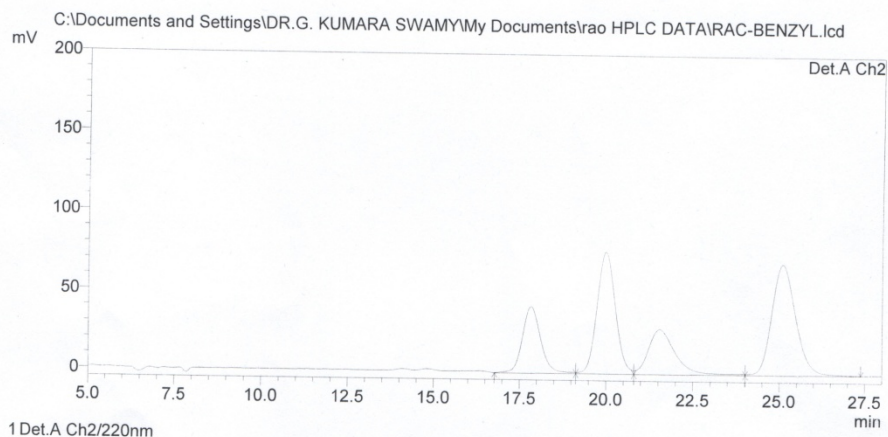

PeakTable

| Peak# | Ret. Time | Area    | Height | Area %  | Height % |
|-------|-----------|---------|--------|---------|----------|
| 1     | 17.824    | 1540337 | 41823  | 16.679  | 19.327   |
| 2     | 19.981    | 2817039 | 76673  | 30.504  | 35.431   |
| 3     | 21.537    | 1510370 | 28286  | 16.355  | 13.071   |
| 4     | 25.083    | 3367372 | 69618  | 36.463  | 32.171   |
| Total |           | 9235118 | 216400 | 100.000 | 100.000  |

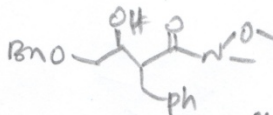

mobile phase : hexane : PPA, 95 : 5  
flow rate : 0.8 ml/min  
d = 220nm  
column : AS-H.

C:\Documents and Settings\DR.G. KUMARA SWAMY\My Documents\rao HPLC DATA\RAC-BENZYL.lcd



### HPLC of 3f, chiral:

9/19/2012 11:37:36 1 / 1

#### ==== OBC Division ====

Acquired by : Admin  
Sample Name : CHI-BENZYL1  
Sample ID : CHI-BENZYL1  
Vial # : 1  
Injection Volume : 20 uL  
Data File Name : CHI-BENZYL1.lcd  
Method File Name : purge.lcm  
Batch File Name :  
Report File Name : DA1 and DA2 report.lcr  
Data Acquired : 9/2/2012 8:05:36 PM  
Data Processed : 9/2/2012 8:37:02 PM

#### <Chromatogram>

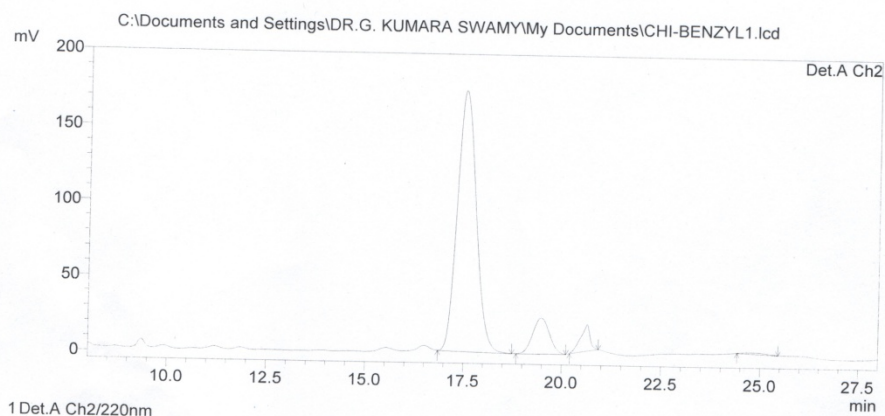

PeakTable

| Peak# | Ret. Time | Area    | Height | Area %  | Height % |
|-------|-----------|---------|--------|---------|----------|
| 1     | 17.501    | 5772578 | 173124 | 84.965  | 80.422   |
| 2     | 19.477    | 700291  | 23952  | 10.307  | 11.126   |
| 3     | 20.643    | 285952  | 17302  | 4.209   | 8.037    |
| 4     | 24.726    | 35235   | 892    | 0.519   | 0.414    |
| Total |           | 6794056 | 215270 | 100.000 | 100.000  |

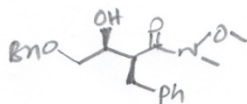

mobile phase: hexane: IPA, 95:5

flowrate: 0.8 ml/min

$\lambda = 220\text{nm}$

column: AS-H

C:\Documents and Settings\DR.G. KUMARA SWAMY\My Documents\CHI-BENZYL1.lcd

HPLC of 3g, racemic:

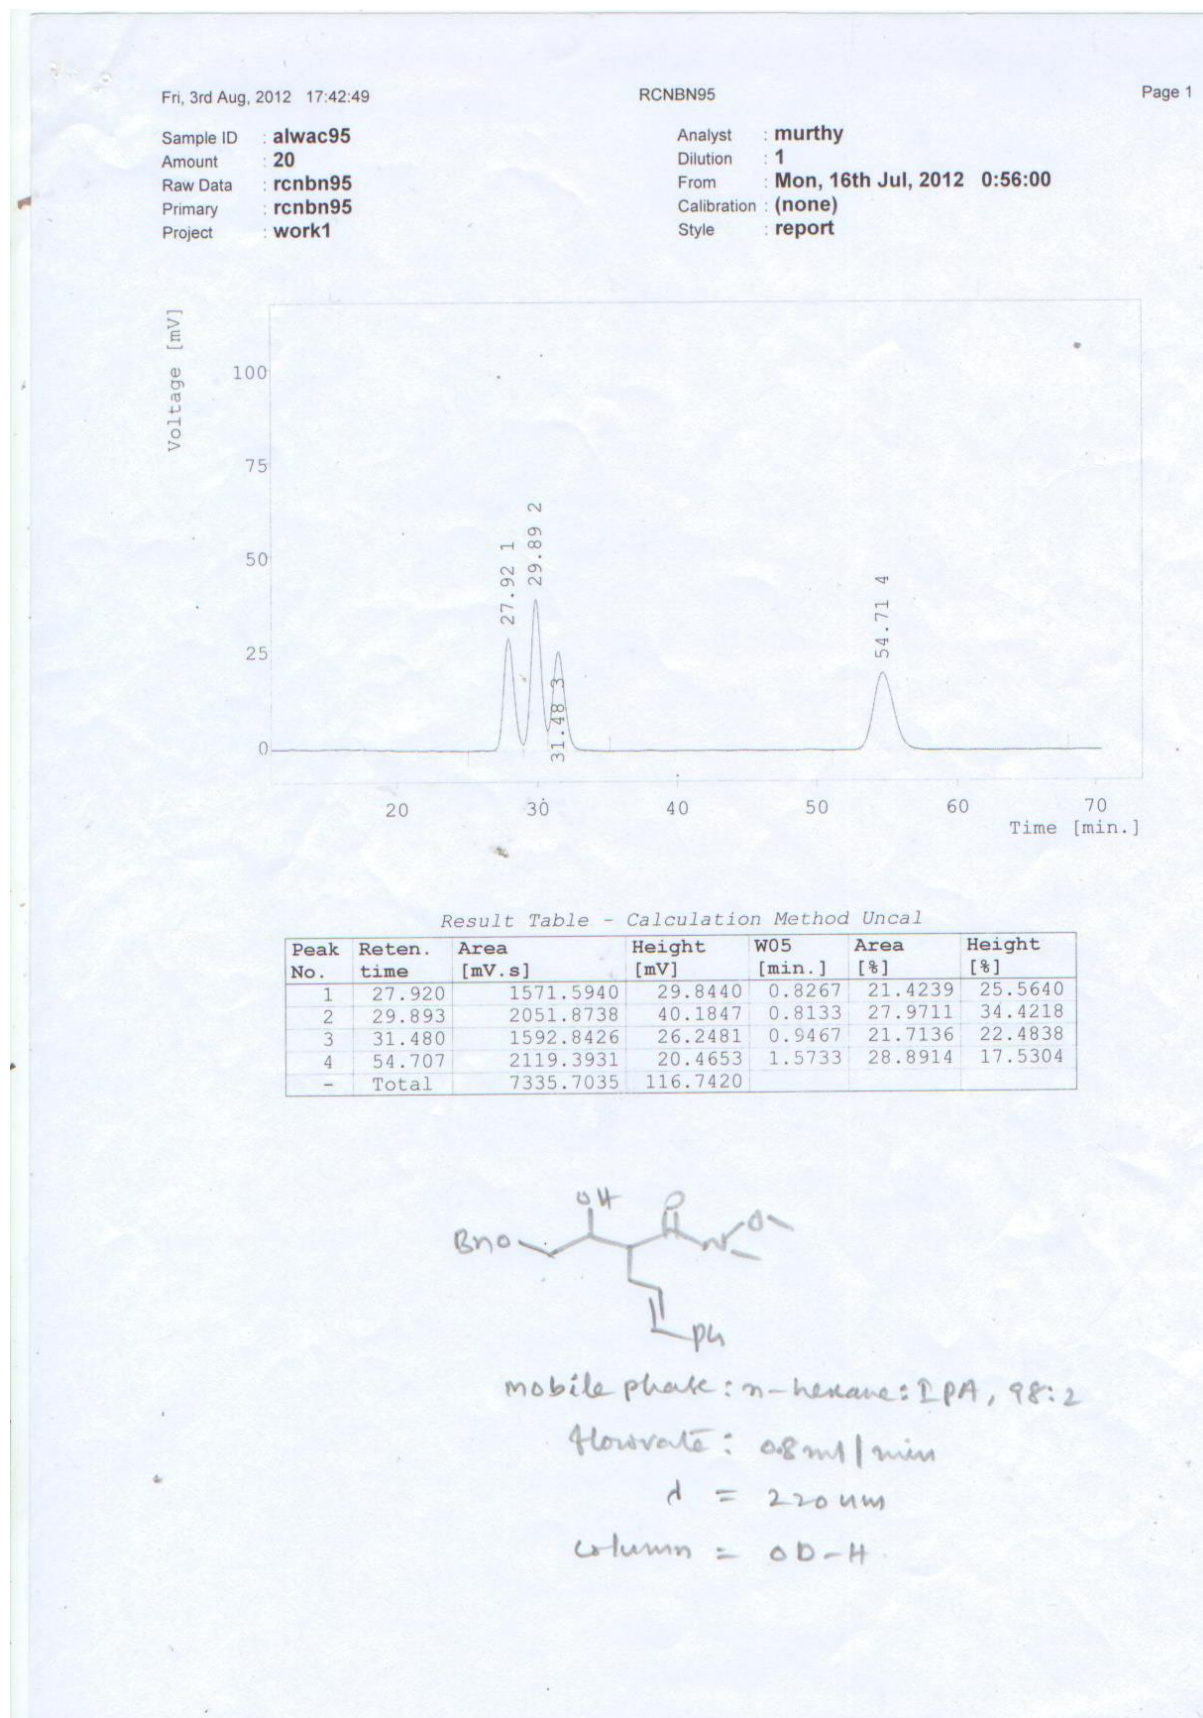

### HPLC of 3g, chiral:

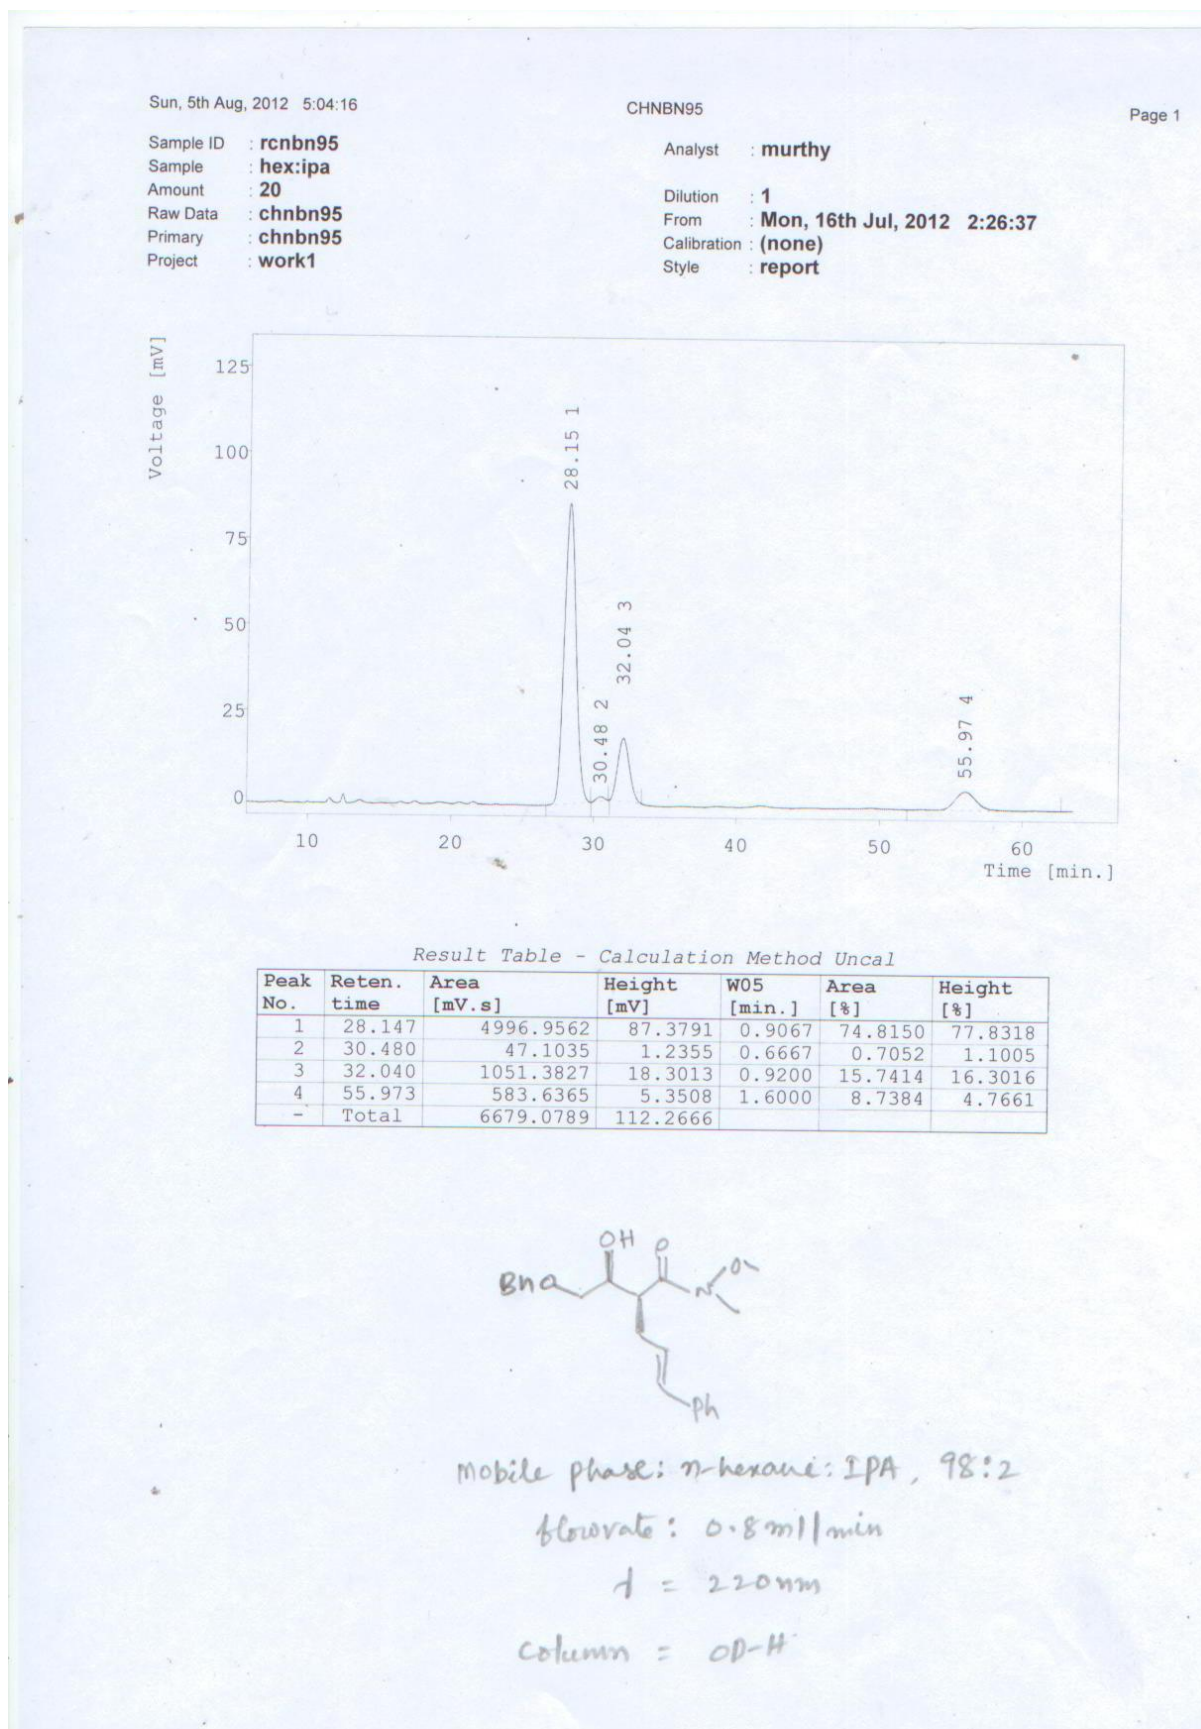

### HPLC of 3h, racemic:

9/19/2012 11:01:38 1 / 1

#### ==== OBC Division ====

Acquired by : Admin  
Sample Name : RAC-CH2-ME1  
Sample ID : RAC-CH2-ME1  
Vial # : 1  
Injection Volume : 20 uL  
Data File Name : RAC-CH2-ME1.lcd  
Method File Name : purge.lcm  
Batch File Name :  
Report File Name : DA1 and DA2 report.lcr  
Data Acquired : 9/1/2012 12:41:52 PM  
Data Processed : 9/1/2012 1:22:24 PM

#### <Chromatogram>

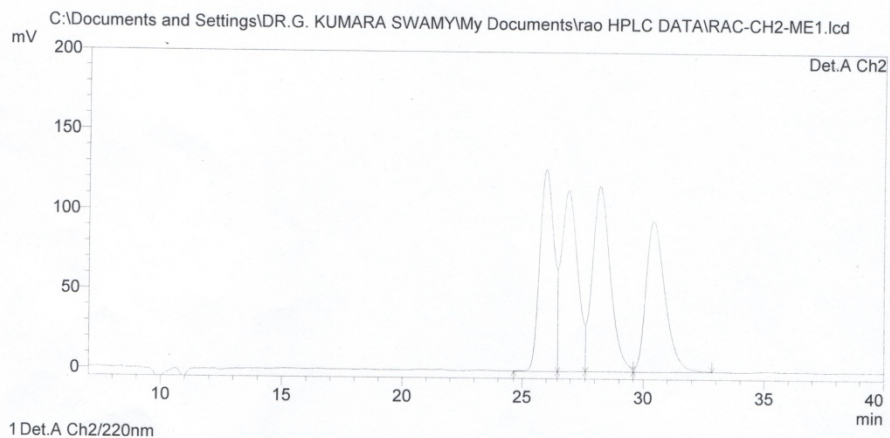

PeakTable

| Peak# | Ret. Time | Area     | Height | Area %  | Height % |
|-------|-----------|----------|--------|---------|----------|
| 1     | 25.964    | 5160317  | 126795 | 23.750  | 28.051   |
| 2     | 26.894    | 5368838  | 113755 | 24.710  | 25.166   |
| 3     | 28.199    | 6001736  | 116452 | 27.623  | 25.763   |
| 4     | 30.411    | 5196476  | 95017  | 23.917  | 21.021   |
| Total |           | 21727366 | 452019 | 100.000 | 100.000  |

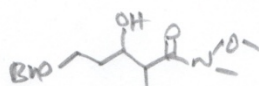

mobile phase: hexane: 2PA, 95:5

flowrate: 0.5 ml/min,

$\lambda = 220\text{nm}$ ,

column: OD-H.

C:\Documents and Settings\DR.G. KUMARA SWAMY\My Documents\rao HPLC DATA\RAC-CH2-ME1.lcd

## HPLC of 3h, chiral:

9/19/2012 11:05:30 1 / 1

### ==== OBC Division ====

Acquired by : Admin  
Sample Name : CHI-CH2-ME1  
Sample ID : CHI-CH2-ME1  
Vial # : 1  
Injection Volume : 20 uL  
Data File Name : CHI-CH2-ME1.lcd  
Method File Name : purge.lcm  
Batch File Name :  
Report File Name : DA1 and DA2 report.lcr  
Data Acquired : 9/1/2012 3:30:21 PM  
Data Processed : 9/1/2012 4:09:43 PM

#### <Chromatogram>

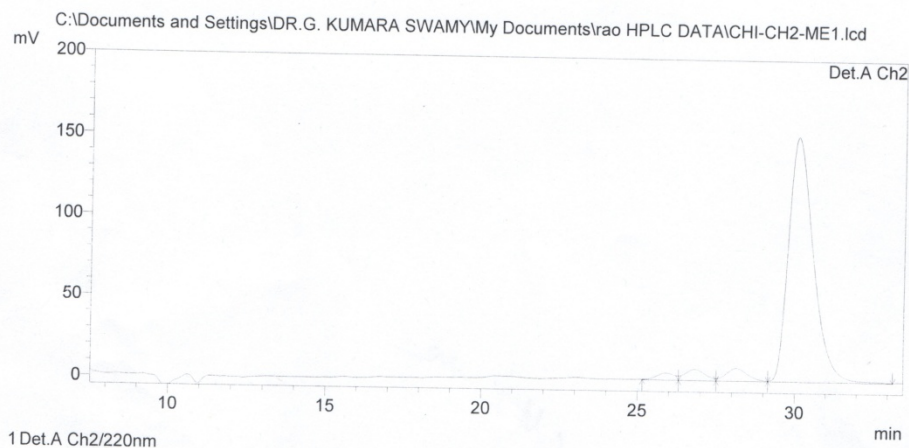

PeakTable

| Peak# | Ret. Time | Area    | Height | Area %  | Height % |
|-------|-----------|---------|--------|---------|----------|
| 1     | 25.892    | 156981  | 4061   | 1.713   | 2.396    |
| 2     | 26.811    | 291753  | 6664   | 3.184   | 3.932    |
| 3     | 28.136    | 360260  | 7705   | 3.932   | 4.547    |
| 4     | 30.051    | 8354057 | 151037 | 91.171  | 89.125   |
| Total |           | 9163051 | 169467 | 100.000 | 100.000  |

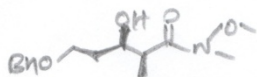

mobile phase: hexane: 2PA, 95:5

flowrate: 0.5 ml/min

d = 220 um

column: OD-H.

C:\Documents and Settings\DR.G. KUMARA SWAMY\My Documents\rao HPLC DATA\CHI-CH2-ME1.lcd

### HPLC of 3i, racemic:

9/19/2012 11:17:29 1 / 1

#### ==== OBC Division ====

Acquired by : Admin  
Sample Name : Rac-CH2-ET2  
Sample ID : Rac-CH2-ET2  
Vial # : 1  
Injection Volume : 20 uL  
Data File Name : Rac-CH2-ET2.lcd  
Method File Name : purge.lcm  
Batch File Name :  
Report File Name : DA1 and DA2 report.lcr  
Data Acquired : 8/31/2012 12:24:09 PM  
Data Processed : 8/31/2012 1:00:42 PM

#### <Chromatogram>

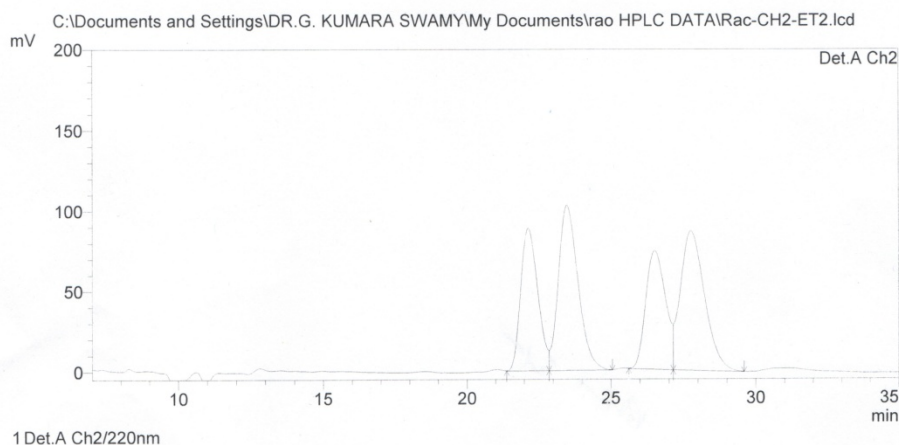

PeakTable

| Peak# | Ret. Time | Area     | Height | Area %  | Height % |
|-------|-----------|----------|--------|---------|----------|
| 1     | 22.142    | 3662374  | 88827  | 21.402  | 25.160   |
| 2     | 23.487    | 4898317  | 103027 | 28.625  | 29.182   |
| 3     | 26.518    | 3500909  | 73993  | 20.459  | 20.959   |
| 4     | 27.764    | 5050326  | 87197  | 29.513  | 24.699   |
| Total |           | 17111927 | 353045 | 100.000 | 100.000  |

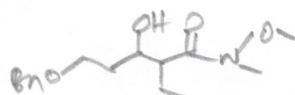

mobile phase: hexane : IPA, 95 : 5

flow rate : 0.5 ml/min

$\lambda = 220\text{nm}$

column : OD-H.

C:\Documents and Settings\DR.G. KUMARA SWAMY\My Documents\rao HPLC DATA\Rac-CH2-ET2.lcd

## HPLC of 3i, chiral:

9/19/2012 11:13:22 1 / 1

### ==== OBC Division ====

Acquired by : Admin  
Sample Name : CHI-CH2-ET  
Sample ID : CHI-CH2-ET  
Vial # : 1  
Injection Volume : 20 uL  
Data File Name : CHI-CH2-ET.lcd  
Method File Name : purge.lcm  
Batch File Name :  
Report File Name : DA1 and DA2 report.lcr  
Data Acquired : 9/1/2012 11:32:13 AM  
Data Processed : 9/1/2012 12:06:36 PM

#### <Chromatogram>

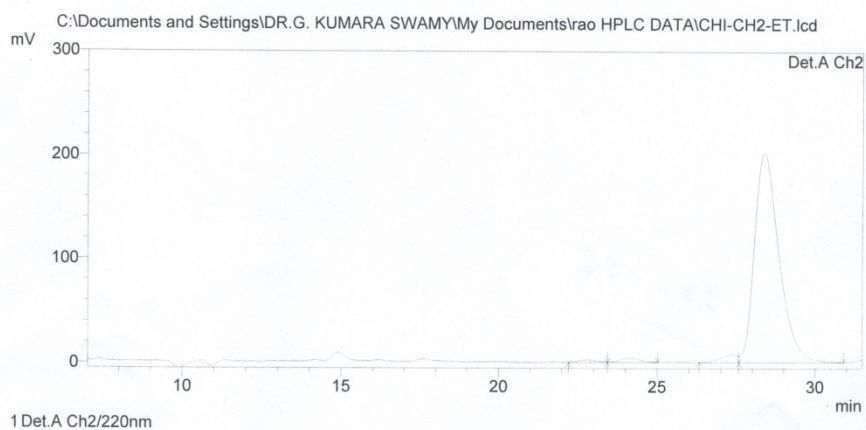

PeakTable

| Peak# | Ret. Time | Area     | Height | Area %  | Height % |
|-------|-----------|----------|--------|---------|----------|
| 1     | 22.794    | 88386    | 2409   | 0.771   | 1.120    |
| 2     | 24.126    | 161577   | 3924   | 1.409   | 1.824    |
| 3     | 27.306    | 256452   | 7250   | 2.236   | 3.371    |
| 4     | 28.358    | 10962545 | 201525 | 95.584  | 93.686   |
| Total |           | 11468959 | 215108 | 100.000 | 100.000  |

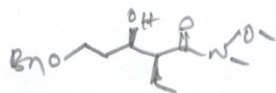

mobile phase: hexane : IPA, 95:5

flow rate: 0.5 ml/min,

$\lambda = 220\text{nm}$

column: OD-H.

C:\Documents and Settings\DR.G. KUMARA SWAMY\My Documents\rao HPLC DATA\CHI-CH2-ET.lcd

### HPLC of 3j, racemic:

Sun, 14th Oct, 2012 12:25:32

BNCHR95

Page 1

Sample ID : **ipahex**  
Amount : **20**  
Raw Data : **bnchr95**  
Primary : **bnchr95**  
Project : **work1**

Analyst : **murthy**  
Dilution : **1**  
From : **Sun, 15th Jul, 2012 19:27:36**  
Calibration : **(none)**  
Style : **report**

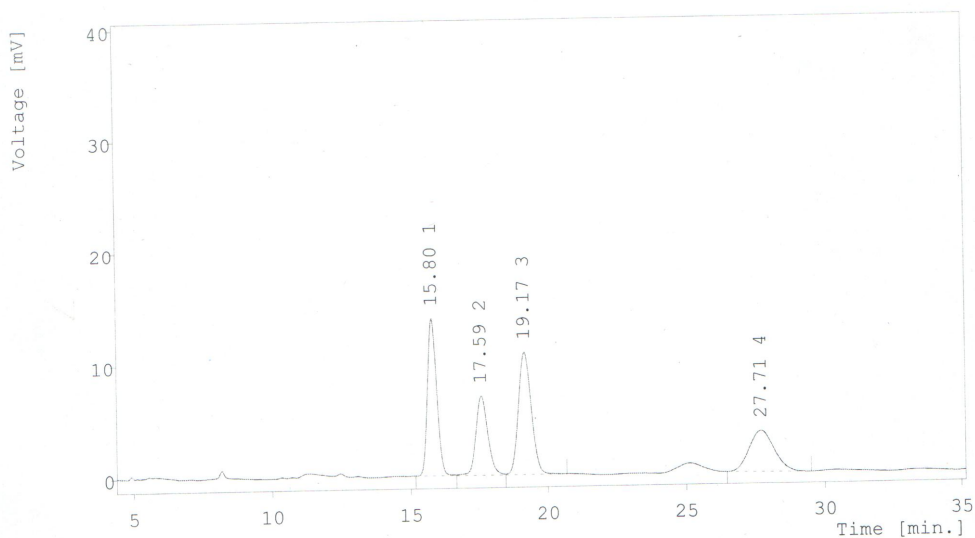

Result Table - Calculation Method Uncal

| Peak No. | Reten. time | Area [mV.s] | Height [mV] | W05 [min.] | Area [%] | Height [%] |
|----------|-------------|-------------|-------------|------------|----------|------------|
| 1        | 15.800      | 327.2803    | 13.9913     | 0.3733     | 29.0581  | 39.3186    |
| 2        | 17.587      | 212.2138    | 7.0448      | 0.4667     | 18.8417  | 19.7974    |
| 3        | 19.173      | 355.3189    | 10.8924     | 0.5200     | 31.5475  | 30.6101    |
| 4        | 27.707      | 231.4849    | 3.6559      | 1.0000     | 20.5527  | 10.2739    |
| -        | Total       | 1126.2978   | 35.5843     |            |          |            |

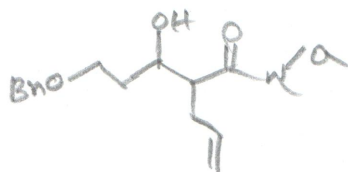

mobile phase: n-hexane : IPA, 95:5

flowrate: 0.8 ml/min

d = 220 nm

column = AS-H.



### HPLC of 3j, chiral:

Sun, 14th Oct, 2012 12:29:48

BNCHC95

Page 1

Sample ID : **bnchr95**  
Amount : **20**  
Raw Data : **bnchc95**  
Primary : **bnchc95**  
Project : **work1**

Analyst : **murthy**  
Dilution : **1**  
From : **Sun, 15th Jul, 2012 20:12:35**  
Calibration : **(none)**  
Style : **report**

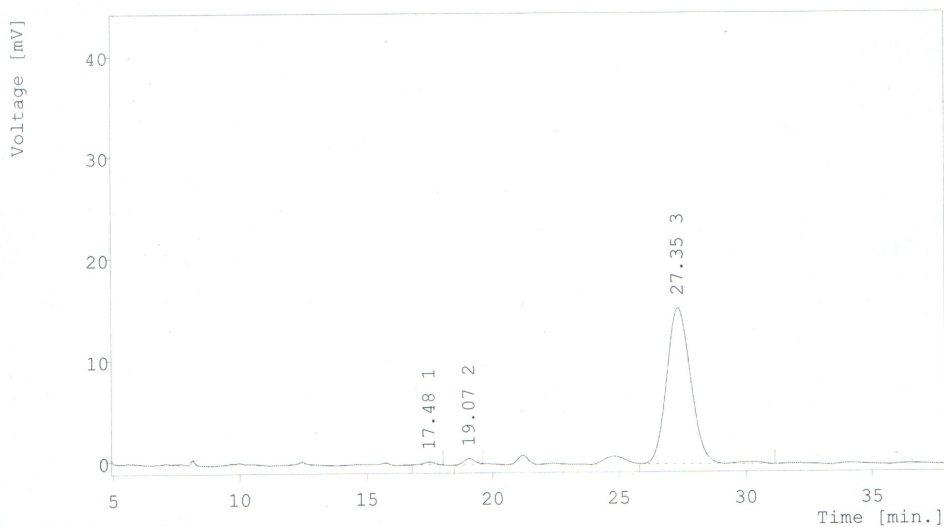

Result Table - Calculation Method Uncal

| Peak No. | Reten. time | Area [mV.s] | Height [mV] | W05 [min.] | Area [%] | Height [%] |
|----------|-------------|-------------|-------------|------------|----------|------------|
| 1        | 17.480      | 8.6391      | 0.2817      | 0.4667     | 0.8240   | 1.7274     |
| 2        | 19.067      | 16.6156     | 0.5725      | 0.4800     | 1.5847   | 3.5102     |
| 3        | 27.347      | 1023.2314   | 15.4541     | 1.0267     | 97.5913  | 94.7624    |
| -        | Total       | 1048.4861   | 16.3083     |            |          |            |

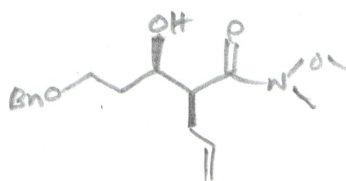

mobile phase : n-hexane : IPA, 95:5

flowrate : 0.8 ml/min

$\lambda = 220 \text{ nm}$

column = AS-H.

### HPLC of 3k, racemic:

9/19/2012 10:52:59 1 / 1

#### ==== OBC Division ====

Acquired by : Admin  
Sample Name : RAC-CH2-CIN  
Sample ID : RAC-CH2-CIN  
Vial # : 1  
Injection Volume : 20 uL  
Data File Name : RAC-CH2-CIN.lcd  
Method File Name : purge.lcm  
Batch File Name :  
Report File Name : DA1 and DA2 report.lcr  
Data Acquired : 9/3/2012 1:17:37 PM  
Data Processed : 9/3/2012 1:43:18 PM

#### <Chromatogram>

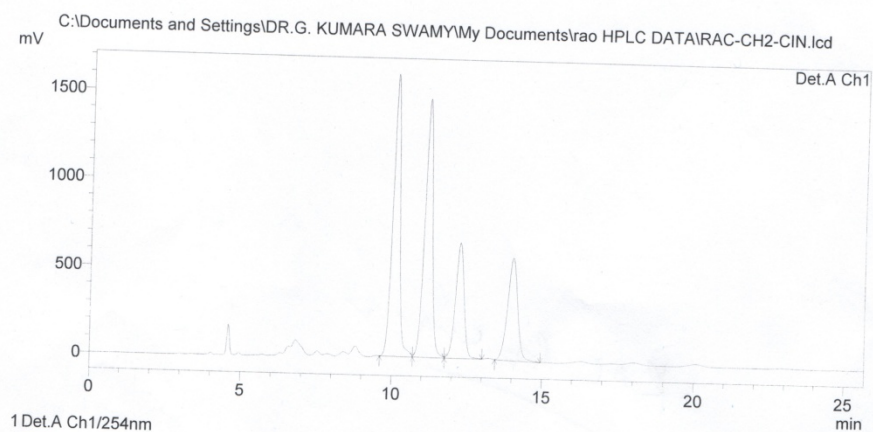

Detector A Ch1 254nm

| Peak# | Ret. Time | Area     | Height  | Area %  | Height % |
|-------|-----------|----------|---------|---------|----------|
| 1     | 10.067    | 26823820 | 1604302 | 33.575  | 37.220   |
| 2     | 11.151    | 26685601 | 1466957 | 33.402  | 34.034   |
| 3     | 12.242    | 12861167 | 655675  | 16.098  | 15.212   |
| 4     | 14.009    | 13521862 | 583340  | 16.925  | 13.534   |
| Total |           | 79892451 | 4310274 | 100.000 | 100.000  |

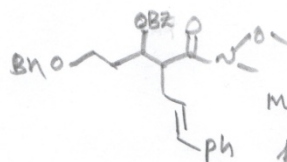

mobile phase: hexane:IPA, 90:10,

flow rate: 1ml/min

d = 2.5µm

column: IA

C:\Documents and Settings\DR.G. KUMARA SWAMY\My Documents\rao HPLC DATA\RAC-CH2-CIN.lcd

### HPLC of 3k, chiral:

9/19/2012 10:56:31 1 / 1

#### ==== OBC Division ====

Acquired by : Admin  
Sample Name : CHI-CH2-CIN1  
Sample ID : CHI-CH2-CIN1  
Vial # : 1  
Injection Volume : 20 uL  
Data File Name : CHI-CH2-CIN1.lcd  
Method File Name : purge.lcm  
Batch File Name :  
Report File Name : DA1 and DA2 report.lcr  
Data Acquired : 9/3/2012 3:40:18 PM  
Data Processed : 9/3/2012 4:05:26 PM

#### <Chromatogram>

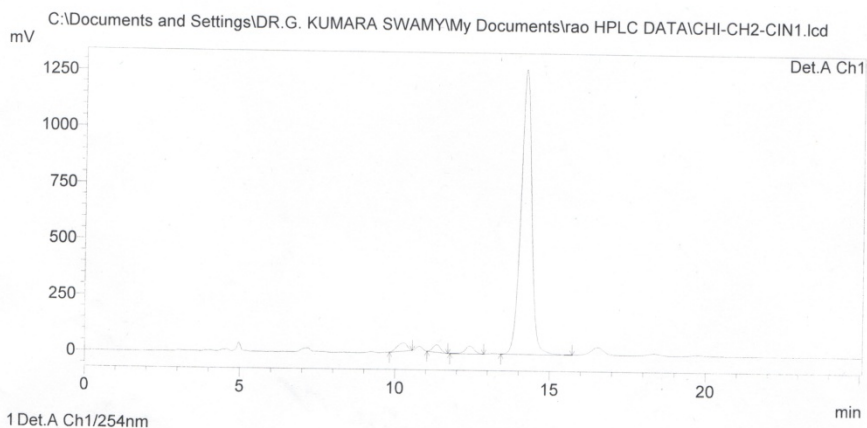

Detector A Ch1 254nm

PeakTable

| Peak# | Ret. Time | Area     | Height  | Area %  | Height % |
|-------|-----------|----------|---------|---------|----------|
| 1     | 10.277    | 797522   | 35575   | 2.458   | 2.594    |
| 2     | 11.354    | 558804   | 33046   | 1.722   | 2.409    |
| 3     | 12.435    | 675435   | 34066   | 2.082   | 2.484    |
| 4     | 14.201    | 30414559 | 1268856 | 93.738  | 92.513   |
| Total |           | 32446321 | 1371543 | 100.000 | 100.000  |

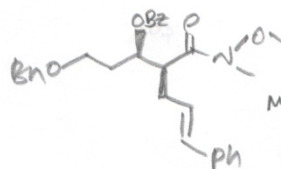

mobile phase: hexane: IPA, 90:10.

flow rate: 1ml/min,

$\lambda = 254 \text{ nm}$

column: IA.

C:\Documents and Settings\DR.G. KUMARA SWAMY\My Documents\rao HPLC DATA\CHI-CH2-CIN1.lcd

### HPLC of 3l, racemic:

8/24/2012 16:24:59 1 / 1

#### ==== OBC Division ====

Acquired by : Admin  
Sample Name : RAC-allyl98  
Sample ID : RAC-allyl98  
Vial # : 1  
Injection Volume : 20 uL  
Data File Name : RAC-allyl98.lcd  
Method File Name : rao method.lcm  
Batch File Name :  
Report File Name : DA1 and DA2 report.lcr  
Data Acquired : 8/24/2012 3:05:38 PM  
Data Processed : 8/24/2012 3:35:57 PM

#### <Chromatogram>

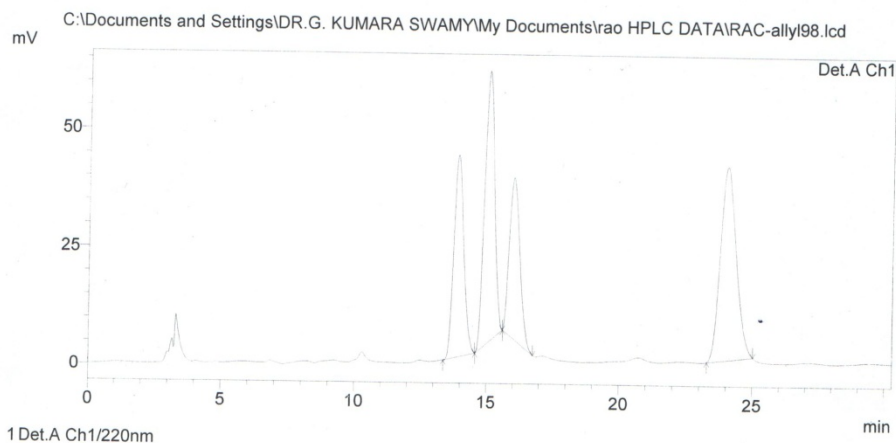

PeakTable

| Peak# | Ret. Time | Area    | Height | Area %  | Height % |
|-------|-----------|---------|--------|---------|----------|
| 1     | 13.889    | 1116765 | 42903  | 21.130  | 24.404   |
| 2     | 15.034    | 1508039 | 57685  | 28.533  | 32.812   |
| 3     | 15.999    | 951714  | 34104  | 18.007  | 19.399   |
| 4     | 24.018    | 1708648 | 41112  | 32.329  | 23.385   |
| Total |           | 5285166 | 175803 | 100.000 | 100.000  |

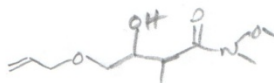

mobile phase : n-hexane : IPA = 98:2

flowrate : 1ml/min

d = 220nm

column = OD-H

C:\Documents and Settings\DR.G. KUMARA SWAMY\My Documents\rao HPLC DATA\RAC-allyl98.lcd

### HPLC of 3l, chiral:

8/24/2012 16:23:03 1 / 1

#### ==== OBC Division ====

Acquired by : Admin  
Sample Name : CHI-allyl98  
Sample ID : CHI-allyl98  
Vial # : 1  
Injection Volume : 20 uL  
Data File Name : CHI-allyl98.lcd  
Method File Name : rao method.lcm  
Batch File Name :  
Report File Name : DA1 and DA2 report.lcr  
Data Acquired : 8/24/2012 3:45:00 PM  
Data Processed : 8/24/2012 4:13:40 PM

#### <Chromatogram>

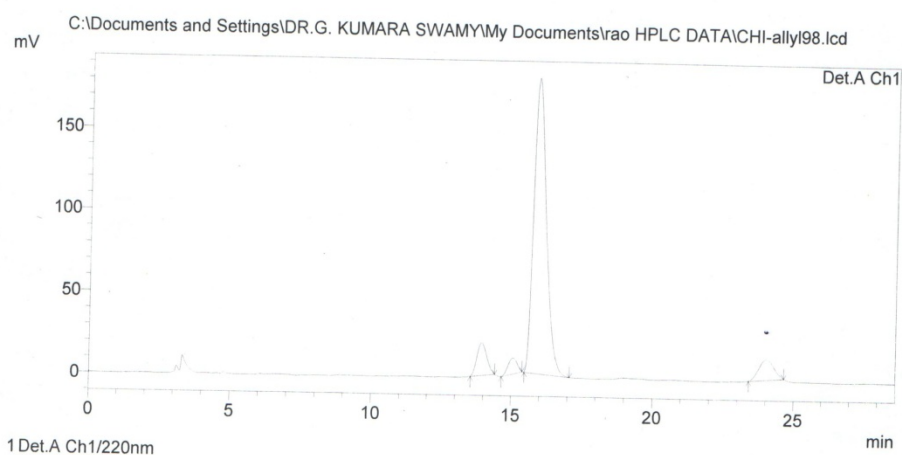

PeakTable

| Peak# | Ret. Time | Area    | Height | Area %  | Height % |
|-------|-----------|---------|--------|---------|----------|
| 1     | 13.938    | 480251  | 19721  | 7.105   | 8.877    |
| 2     | 15.063    | 214221  | 9662   | 3.169   | 4.349    |
| 3     | 15.867    | 5596688 | 180163 | 82.804  | 81.097   |
| 4     | 24.023    | 467797  | 12611  | 6.921   | 5.677    |
| Total |           | 6758957 | 222156 | 100.000 | 100.000  |

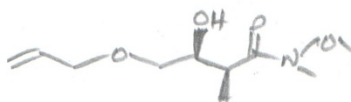

mobile phase: n-hexane:IPA = 98:2

flow rate: 1ml/min

d = 220nm

column = OD-H

C:\Documents and Settings\DR.G. KUMARA SWAMY\My Documents\rao HPLC DATA\CHI-allyl98.lcd

### HPLC of 3m, racemic:

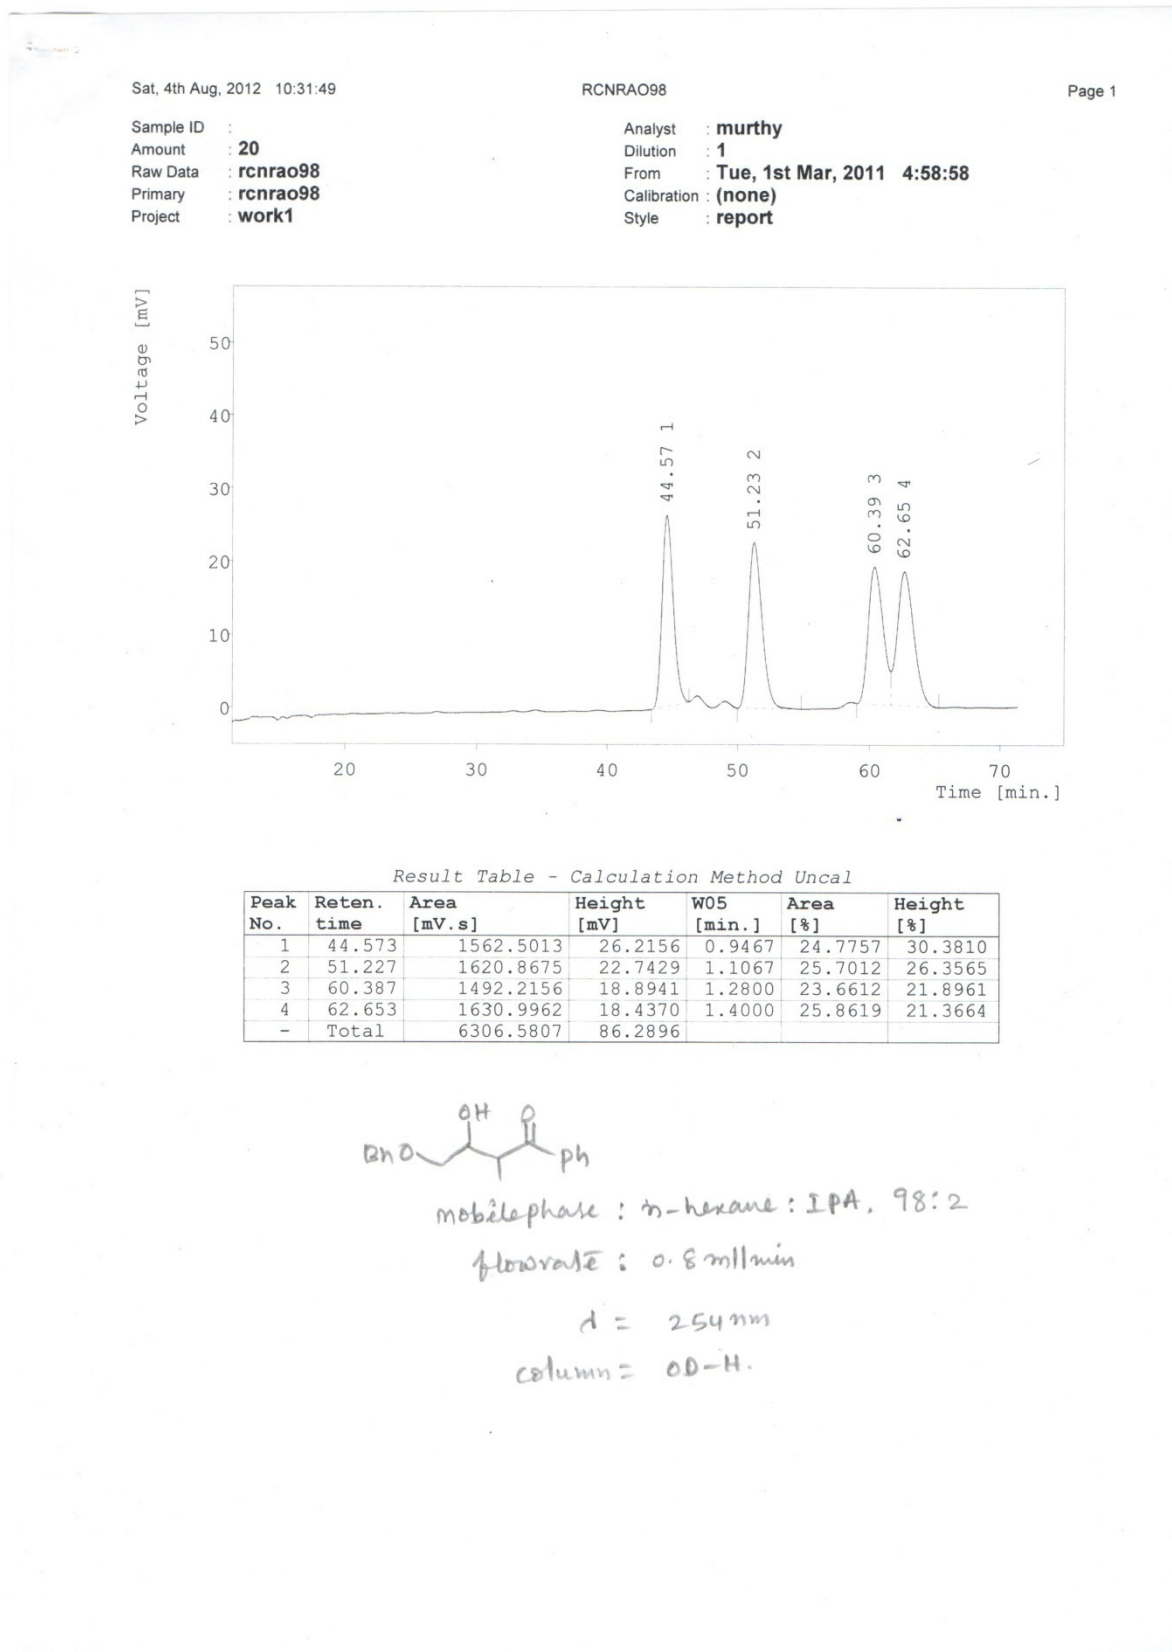

### HPLC of 3m, chiral:

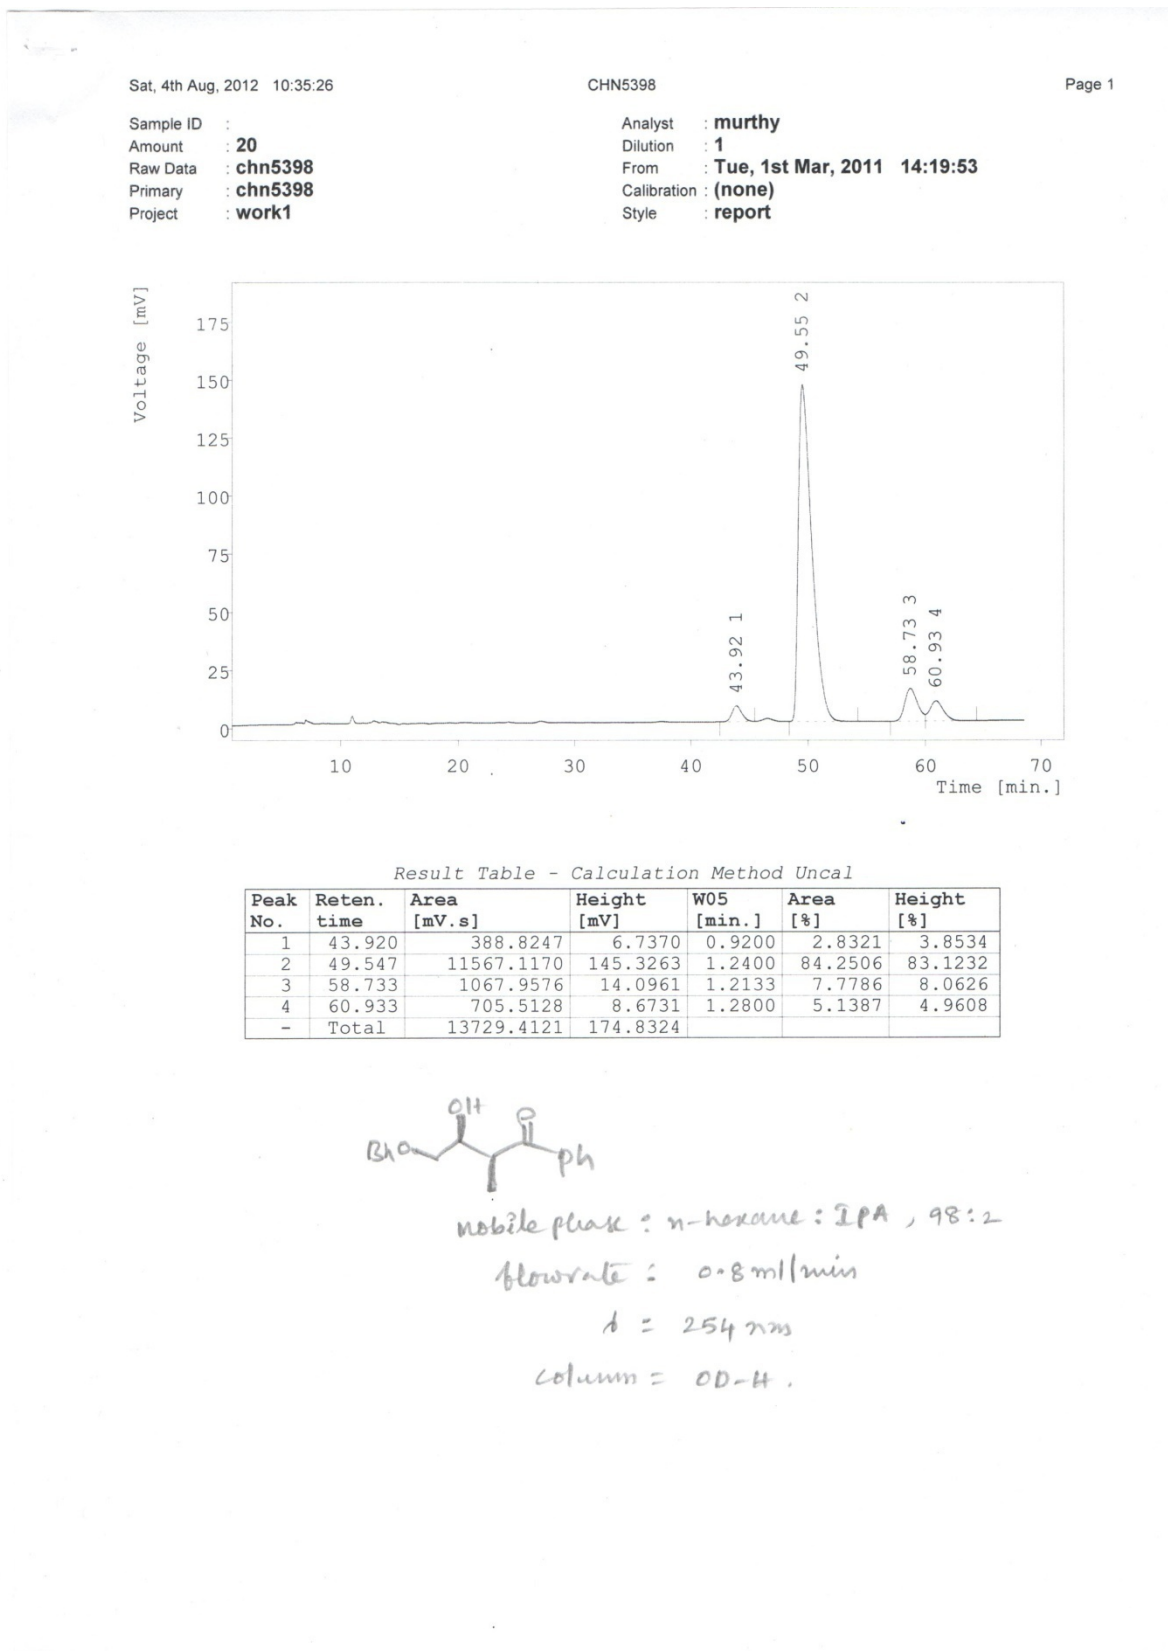

### HPLC of 3n, racemic:

Fri, 3rd Aug, 2012 4:15:11

RAIS99

Page 1

Sample ID :  
Amount : **20**  
Raw Data : **rais99**  
Primary : **rais99**  
Project : **work1**

Analyst : **murthy**  
Dilution : **1**  
From : **Fri, 3rd Aug, 2012 3:31:59**  
Calibration : **(none)**  
Style : **report**

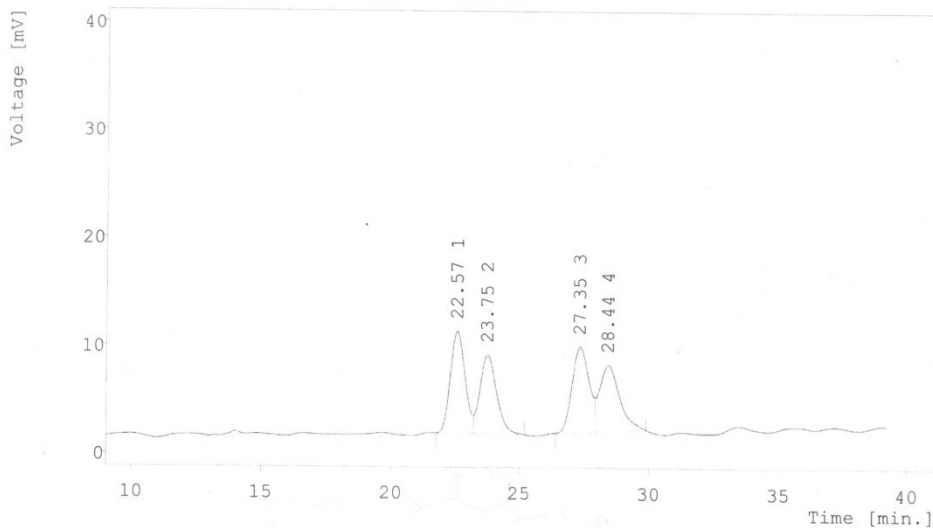

Result Table - Calculation Method Uncal

| Peak No. | Reten. time | Area [mV.s] | Height [mV] | W05 [min.] | Area [%] | Height [%] |
|----------|-------------|-------------|-------------|------------|----------|------------|
| 1        | 22.573      | 377.9821    | 9.4758      | 0.6533     | 26.7370  | 30.6323    |
| 2        | 23.747      | 335.6388    | 7.3429      | 0.7067     | 23.7418  | 23.7374    |
| 3        | 27.347      | 361.8751    | 7.9275      | 0.7867     | 25.5977  | 25.6270    |
| 4        | 28.440      | 338.2074    | 6.1879      | 0.9733     | 23.9235  | 20.0033    |
| -        | Total       | 1413.7033   | 30.9341     |            |          |            |

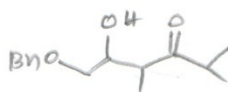

mobile phase : n-hexane : IPA, 99:1

flow rate : 1ml/min

UV = 220 nm

column = OD-H.



### HPLC of 3n, chiral:

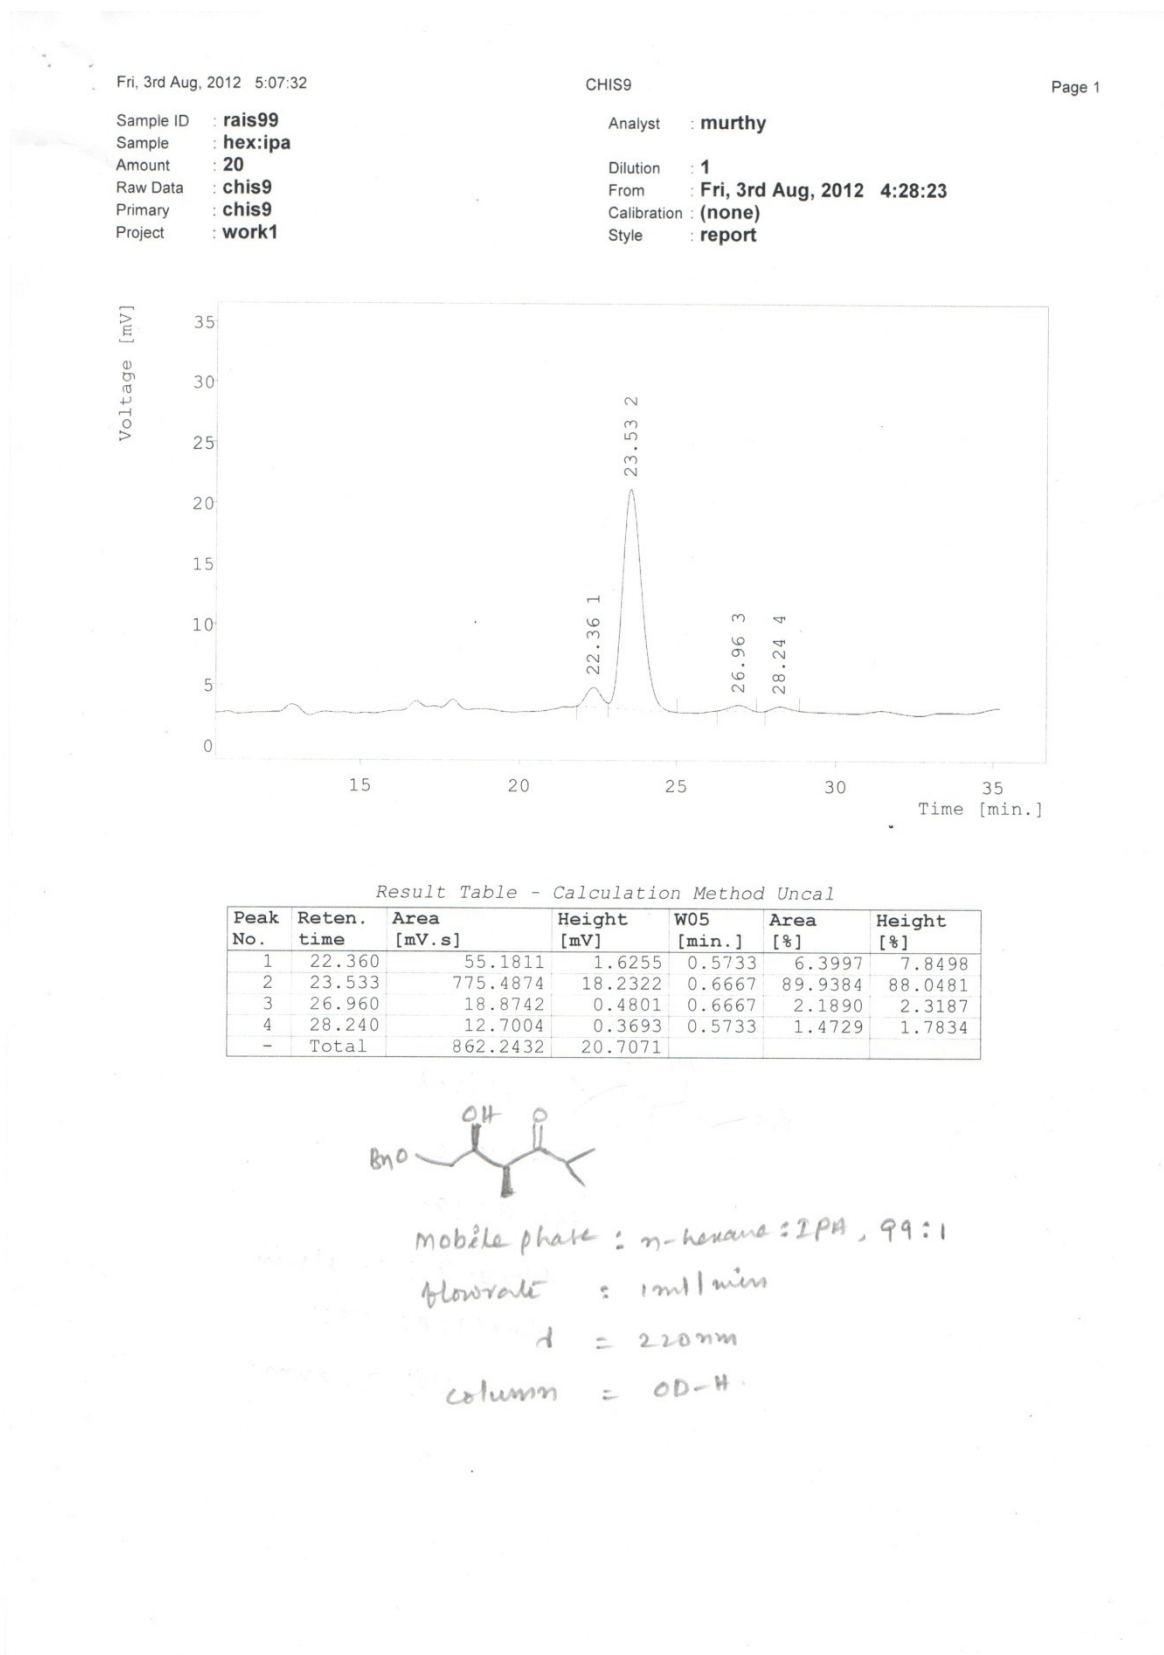

## NMR (NOE) - study

### Compound, 9:

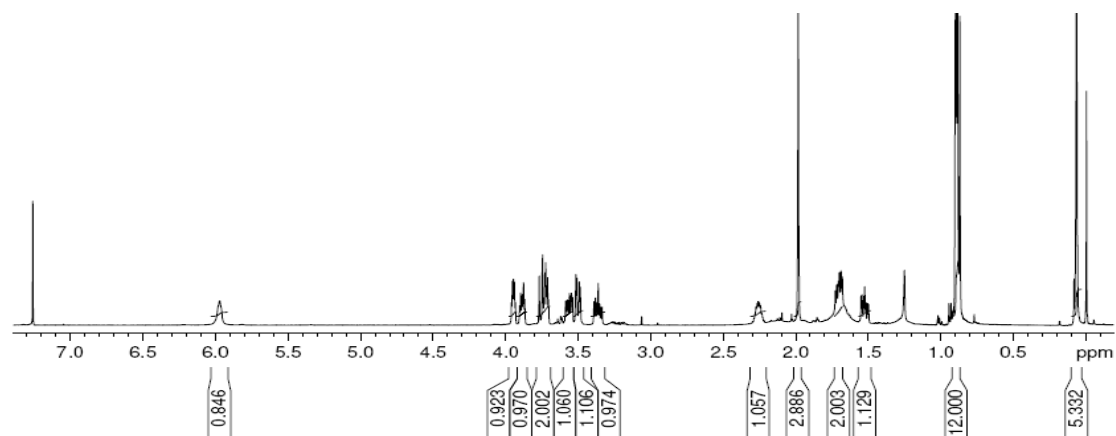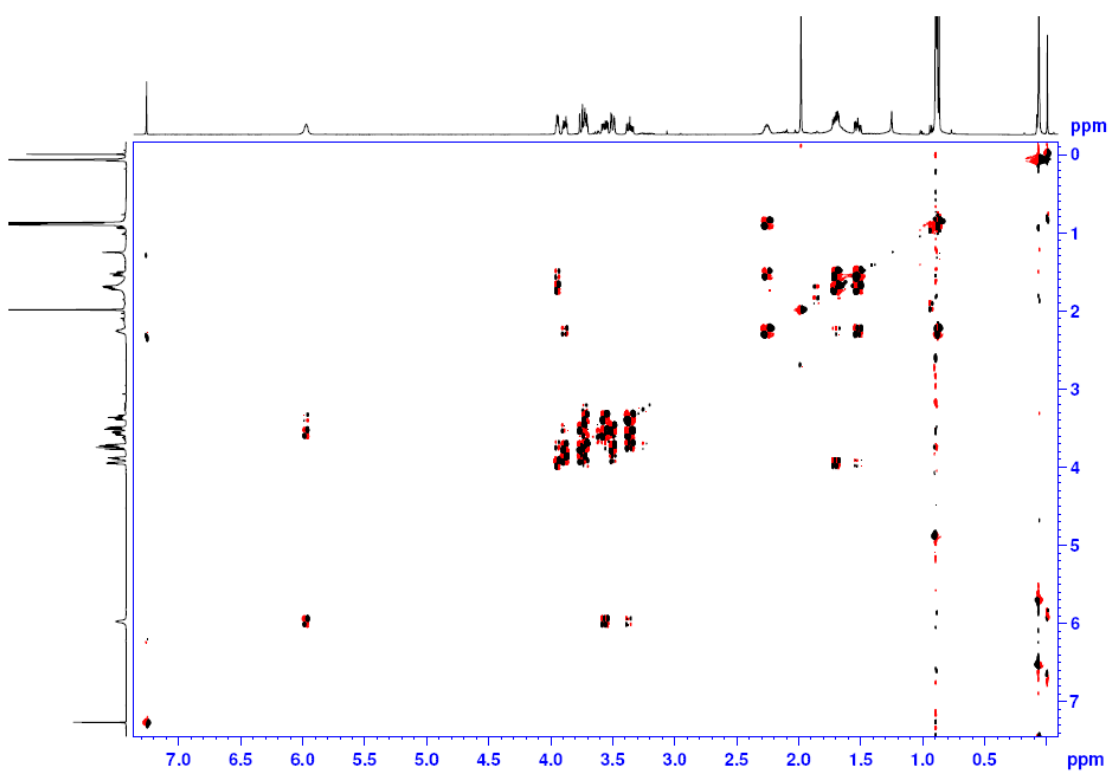

COSY Spectrum of Compound **9** ( $\text{CDCl}_3$ , 298 K, AVANCE 500 MHz)

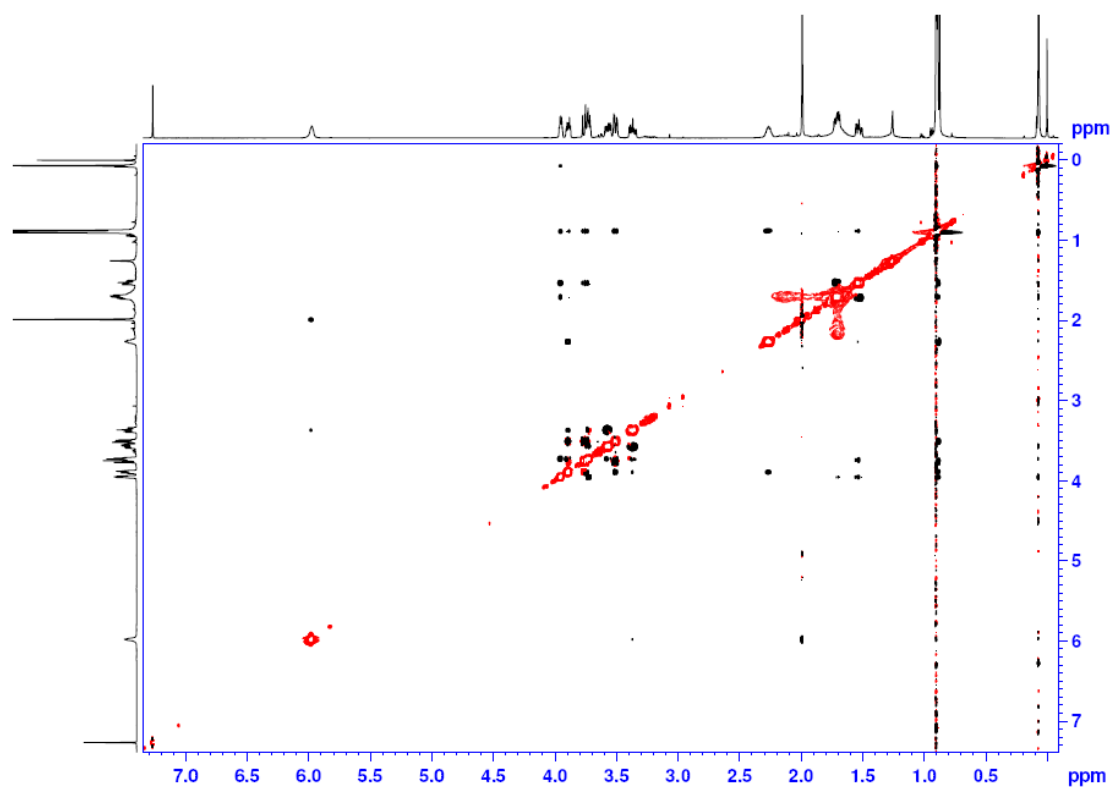

NOESY Spectrum of Compound **9** (CDCl<sub>3</sub>, 298 K, AVANCE 500 MHz)

**Compound, 11:**

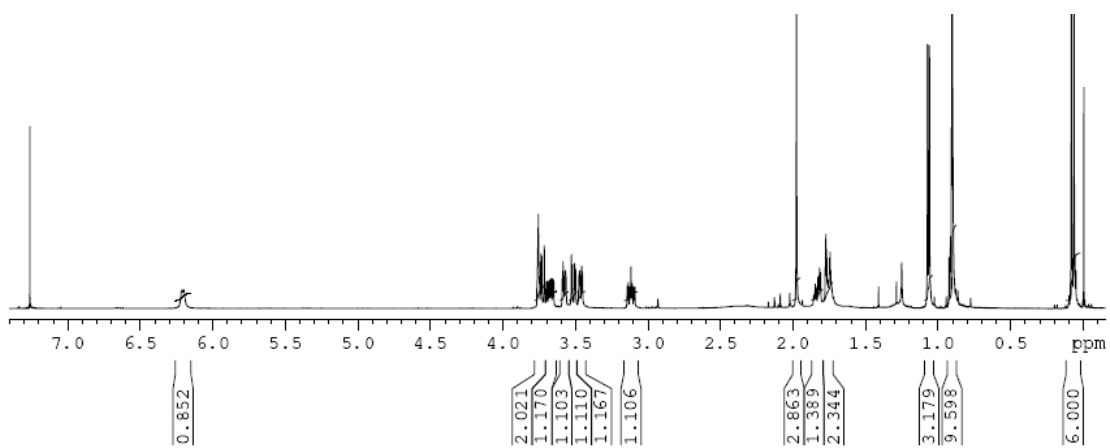

<sup>1</sup>H NMR Spectrum of compound **11** (CDCl<sub>3</sub>, 298 K, AVANCE 500 MHz)

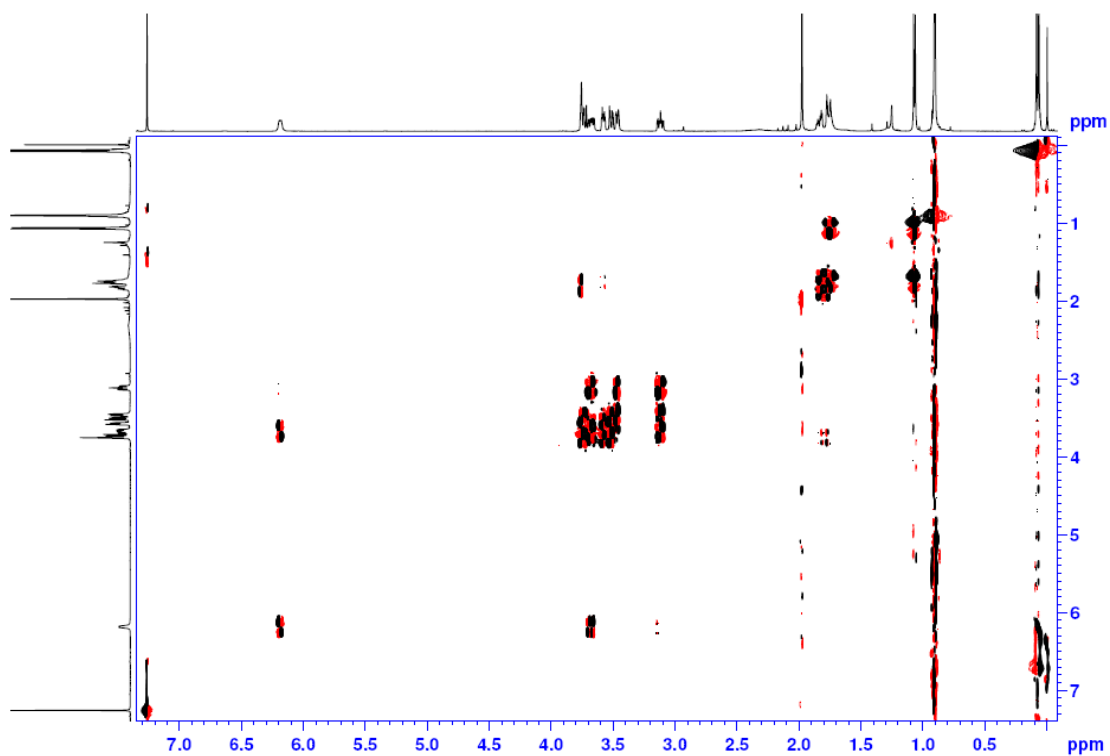

COSY Spectrum of Compound **11** (CDCl<sub>3</sub>, 298 K, AVANCE 500 MHz)

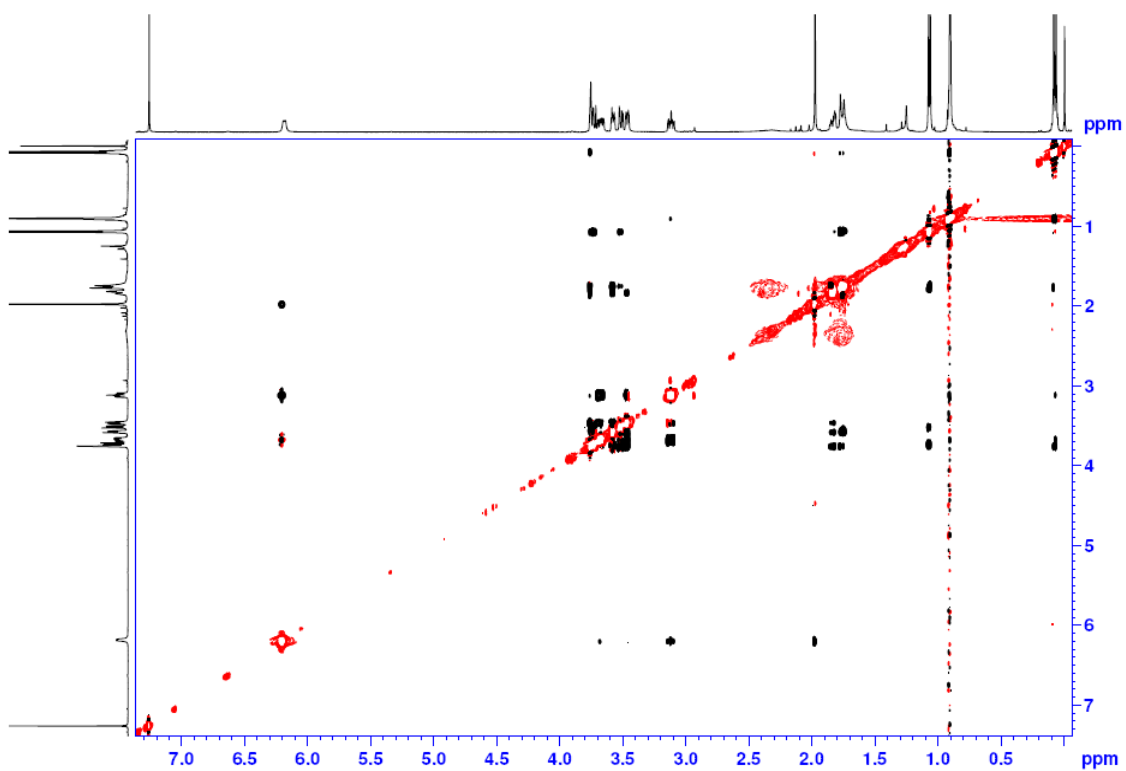

NOESY Spectrum of Compound **11** (CDCl<sub>3</sub>, 298 K, AVANCE 500 MHz)

**Compound 15:**

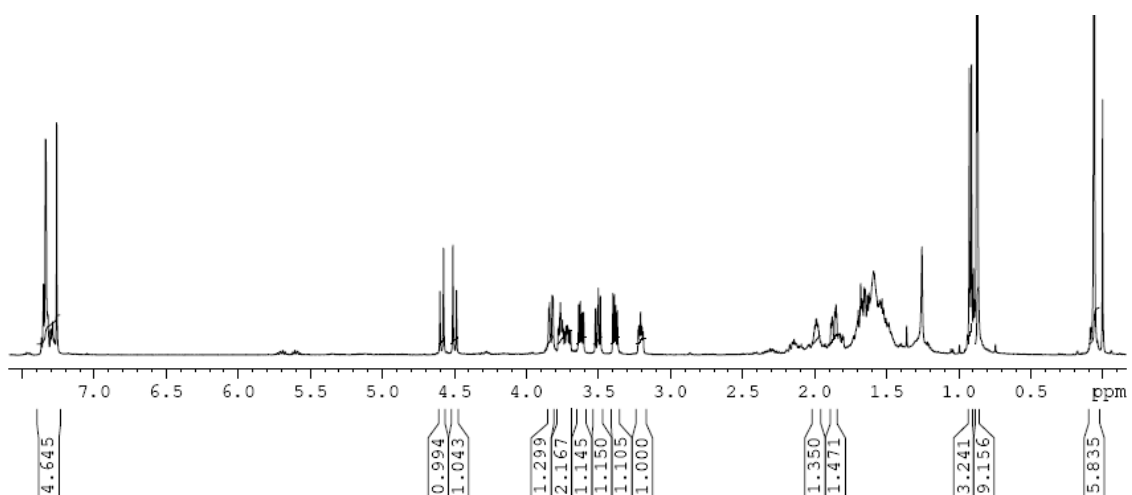

$^1\text{H}$  NMR Spectrum of Compound **15** ( $\text{CDCl}_3$ , 298 K, AVANCE 500 MHz)

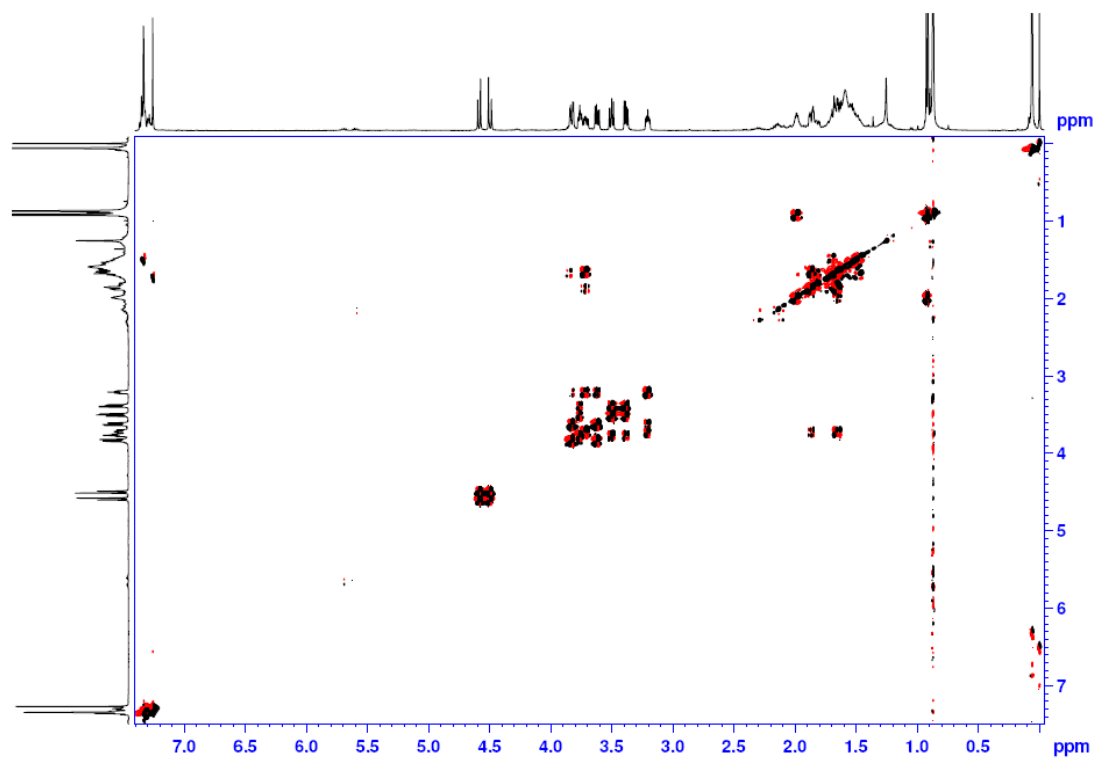

COSY Spectrum of Compound **15** ( $\text{CDCl}_3$ , 298 K, AVANCE 500 MHz)

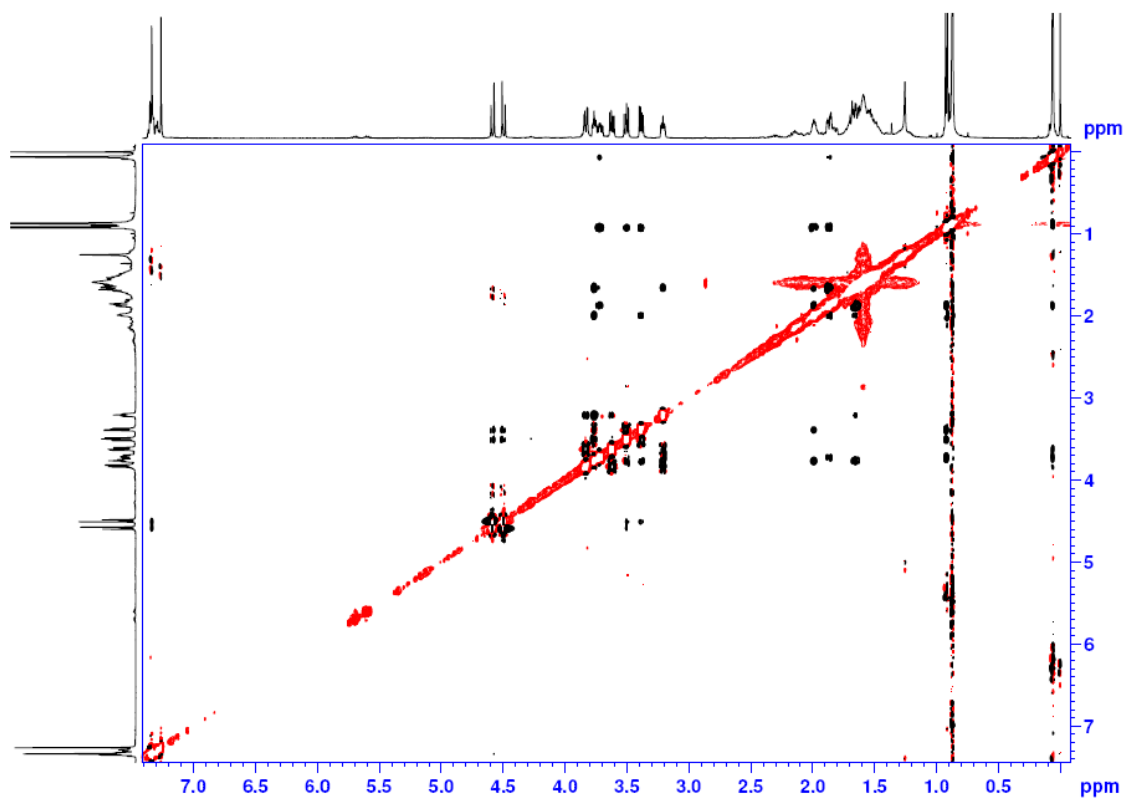

NOESY Spectrum of Compound **15** ( $\text{CDCl}_3$ , 298 K, AVANCE 500 MHz)
